# Supplementary material
Source: HighWire-hosted journal article supplement (https://jitc.bmj.com/content/8/2/e001095)
Supplement: inline-supplementary-material-2 [file inline-supplementary-material-2.xlsx]

## Sheet: Blood_D2_v_D1
	Baseline avg	Day 2 avg	log2 fold change	p value	FDR (q value)	Gene.Title	Gene.Symbol	Chromosomal.Location
205569_at	5.284	11.248	5.964	4.52922e-19	1.62437e-15	lysosomal-associated membrane protein 3	LAMP3	chr3q26.3-q27
214038_at	4.081	9.585	5.504	2.08276e-15	3.24768e-13	chemokine (C-C motif) ligand 8	CCL8	chr17q11.2
204533_at	5.498	10.991	5.493	2.76811e-16	9.64144e-14	chemokine (C-X-C motif) ligand 10	CXCL10	chr4q21
219211_at	6.246	10.601	4.355	4.80995e-17	2.90278e-14	ubiquitin specific peptidase 18	USP18	chr22q11.21
213797_at	8.783	12.812	4.029	4.22865e-13	1.57158e-11	radical S-adenosyl methionine domain containing 2	RSAD2	chr2p25.2
216598_s_at	4.094	8.103	4.009	3.13708e-15	4.16701e-13	chemokine (C-C motif) ligand 2	CCL2	chr17q11.2-q12
225291_at	6.513	10.304	3.791	3.94728e-18	7.07832e-15	polyribonucleotide nucleotidyltransferase 1	PNPT1	chr2p15
214059_at	6.957	10.7	3.743	3.76115e-12	8.32662e-11	interferon-induced protein 44	IFI44	chr1p31.1
210029_at	6.565	10.197	3.632	3.15109e-12	7.19819e-11	indoleamine 2,3-dioxygenase 1	IDO1	chr8p12-p11
224225_s_at	4.709	8.326	3.617	2.69583e-14	1.89577e-12	ets variant 7	ETV7	chr6p21
242625_at	8.897	12.445	3.548	1.1046e-11	1.9138e-10	radical S-adenosyl methionine domain containing 2	RSAD2	chr2p25.2
217502_at	8.564	12.045	3.481	2.06554e-15	3.24768e-13	interferon-induced protein with tetratricopeptide repeats 2	IFIT2	chr10q23.31
219863_at	9.226	12.701	3.475	1.55933e-14	1.28242e-12	HECT and RLD domain containing E3 ubiquitin protein ligase 5	HERC5	chr4q22.1
204439_at	8.488	11.943	3.455	3.53925e-11	4.84477e-10	interferon-induced protein 44-like	IFI44L	chr1p31.1
219519_s_at	6.294	9.727	3.433	7.80723e-13	2.44682e-11	sialic acid binding Ig-like lectin 1, sialoadhesin	SIGLEC1	chr20p13
222154_s_at	7.184	10.603	3.419	2.6281e-15	3.78584e-13	spermatogenesis associated, serine-rich 2-like	SPATS2L	chr2q33.1
227347_x_at	5.999	9.393	3.394	2.06619e-13	8.73558e-12	hes family bHLH transcription factor 4	HES4	chr1p36.33
218400_at	8.752	12.135	3.383	4.77712e-14	3.00575e-12	2'-5'-oligoadenylate synthetase 2 /// 2'-5'-oligoadenylate synthetase 3	OAS2 /// OAS3	chr12q24.2
205660_at	8.657	11.97	3.313	1.50455e-15	2.55444e-13	2'-5'-oligoadenylate synthetase-like	OASL	chr12q24.2
204972_at	8.237	11.453	3.216	1.57676e-14	1.28242e-12	2'-5'-oligoadenylate synthetase 2	OAS2	chr12q24.2
210001_s_at	5.441	8.65	3.209	1.01739e-14	1.02783e-12	suppressor of cytokine signaling 1	SOCS1	chr16p13.13
218943_s_at	7.775	10.977	3.202	4.85626e-17	2.90278e-14	DEAD (Asp-Glu-Ala-Asp) box polypeptide 58	DDX58	chr9p12
203153_at	9.825	13.012	3.187	1.41567e-12	3.70598e-11	interferon-induced protein with tetratricopeptide repeats 1	IFIT1	chr10q23.31
205483_s_at	10.193	13.371	3.178	2.56081e-14	1.81865e-12	ISG15 ubiquitin-like modifier	ISG15	chr1p36.33
202672_s_at	5.709	8.881	3.172	1.60312e-14	1.28242e-12	activating transcription factor 3	ATF3	chr1q32.3
214453_s_at	8.17	11.314	3.144	4.87427e-11	6.21002e-10	interferon-induced protein 44	IFI44	chr1p31.1
200986_at	7.52	10.64	3.12	8.13434e-14	4.55436e-12	serpin peptidase inhibitor, clade G (C1 inhibitor), member 1	SERPING1	chr11q12.1
226103_at	4.395	7.511	3.116	2.08255e-13	8.73558e-12	nexilin (F actin binding protein)	NEXN	chr1p31.1
206715_at	6.104	9.216	3.112	6.31015e-11	7.75032e-10	transcription factor EC	TFEC	chr7q31.2
205552_s_at	8.137	11.243	3.106	2.58574e-13	1.04198e-11	2'-5'-oligoadenylate synthetase 1	OAS1	chr12q24.2
226702_at	8.912	12.011	3.099	6.8925e-13	2.24723e-11	cytidine monophosphate (UMP-CMP) kinase 2, mitochondrial	CMPK2	chr2p25.2
211267_at	4.074	7.12	3.046	4.59976e-12	9.73258e-11	HESX homeobox 1	HESX1	chr3p14.3
230997_at	5.146	8.177	3.031	2.54878e-17	2.85164e-14	tetratricopeptide repeat domain 21A	TTC21A	chr3p22.2
1552309_a_at	6.349	9.374	3.025	2.91264e-17	2.85164e-14	nexilin (F actin binding protein)	NEXN	chr1p31.1
242020_s_at	6.667	9.67	3.003	2.50272e-15	3.73993e-13	Z-DNA binding protein 1	ZBP1	chr20q13.31
227458_at	7.602	10.581	2.979	2.51014e-12	6.0217e-11	CD274 molecule	CD274	chr9p24
232383_at	4.069	7.046	2.977	4.66788e-10	3.95769e-09	transcription factor EC	TFEC	chr7q31.2
235256_s_at	7	9.976	2.976	4.65032e-21	3.33561e-17	galactose mutarotase (aldose 1-epimerase)	GALM	chr2p22.1
222793_at	8.409	11.37	2.961	6.58835e-17	3.63518e-14	DEAD (Asp-Glu-Ala-Asp) box polypeptide 58	DDX58	chr9p12
219209_at	7.662	10.604	2.942	3.04649e-15	4.12303e-13	interferon induced, with helicase C domain 1	IFIH1	chr2q24
204747_at	9.791	12.711	2.92	1.92527e-13	8.44605e-12	interferon-induced protein with tetratricopeptide repeats 3	IFIT3	chr10q24
210797_s_at	8.658	11.561	2.903	7.8079e-16	1.9096e-13	2'-5'-oligoadenylate synthetase-like	OASL	chr12q24.2
235112_at	6.484	9.379	2.895	1.78023e-14	1.40323e-12	KIAA1958	KIAA1958	chr9q32
228607_at	6.705	9.598	2.893	1.34465e-16	5.67354e-14	2'-5'-oligoadenylate synthetase 2	OAS2	chr12q24.2
212845_at	5.752	8.632	2.88	7.96792e-15	8.42025e-13	sterile alpha motif domain containing 4A	SAMD4A	chr14q22.2
202086_at	10.093	12.962	2.869	1.02342e-13	5.43769e-12	MX dynamin-like GTPase 1	MX1	chr21q22.3
219684_at	7.279	10.137	2.858	1.80775e-14	1.40943e-12	receptor (chemosensory) transporter protein 4	RTP4	chr3q27.3
225344_at	8.548	11.356	2.808	7.84695e-16	1.9096e-13	nuclear receptor coactivator 7	NCOA7	chr6q22.32
219352_at	7.226	10.01	2.784	2.36445e-14	1.71312e-12	HECT and RLD domain containing E3 ubiquitin protein ligase family member 6	HERC6	chr4q22.1
223849_s_at	6.147	8.9	2.753	1.53134e-15	2.55444e-13	Mov10 RISC complex RNA helicase	MOV10	chr1p13.2
208581_x_at	9.651	12.386	2.735	1.35844e-15	2.37657e-13	metallothionein 1X	MT1X	chr16q13
219895_at	3.342	6.077	2.735	3.05582e-09	1.82506e-08	transmembrane protein 255A	TMEM255A	chrXq24
228439_at	6.601	9.326	2.725	8.31031e-13	2.54738e-11	basic leucine zipper transcription factor, ATF-like 2	BATF2	chr11q13.1
238439_at	7.197	9.897	2.7	2.42277e-11	3.52651e-10	ankyrin repeat domain 22	ANKRD22	chr10q23.31
216243_s_at	8.069	10.766	2.697	4.10343e-14	2.70031e-12	interleukin 1 receptor antagonist	IL1RN	chr2q14.2
202869_at	9.279	11.942	2.663	1.32879e-13	6.48382e-12	2'-5'-oligoadenylate synthetase 1	OAS1	chr12q24.2
206461_x_at	9.488	12.14	2.652	1.15958e-15	2.1327e-13	metallothionein 1H	MT1H	chr16q13
227609_at	9.327	11.967	2.64	1.25008e-11	2.08657e-10	epithelial stromal interaction 1 (breast)	EPSTI1	chr13q13.3
210657_s_at	4.516	7.133	2.617	9.0716e-14	4.9295e-12	septin 4	2019-09-04	chr17q22
1568955_at	5.989	8.593	2.604	1.48794e-13	7.1152e-12	SLIT-ROBO Rho GTPase activating protein 2 /// SLIT-ROBO Rho GTPase activating protein 2B /// SLIT-ROBO Rho GTPase activating protein 2C	SRGAP2 /// SRGAP2B /// SRGAP2C	chr1p11.2 /// chr1q21.1 /// chr1q32.1
1569337_at	4.443	7.044	2.601	1.66261e-13	7.59599e-12	solute carrier family 5 (sodium/sugar cotransporter), member 9	SLC5A9	chr1p33
204415_at	10.163	12.763	2.6	3.57802e-13	1.36514e-11	interferon, alpha-inducible protein 6	IFI6	chr1p35
211456_x_at	9.564	12.163	2.599	5.397e-16	1.613e-13	metallothionein 1H-like 1	MT1HL1	chr1q43
215495_s_at	5.242	7.835	2.593	5.20416e-16	1.613e-13	sterile alpha motif domain containing 4A	SAMD4A	chr14q22.2
225385_s_at	4.494	7.085	2.591	4.23672e-12	9.09862e-11	heterogeneous nuclear ribonucleoprotein L-like	HNRNPLL	chr2p22.1
228468_at	4.503	7.094	2.591	4.4914e-15	5.48372e-13	microtubule associated serine/threonine kinase-like	MASTL	chr10p12.1
224973_at	6.249	8.823	2.574	4.62571e-14	2.93625e-12	family with sequence similarity 46, member A	FAM46A	chr6q14
230645_at	7.043	9.604	2.561	4.86566e-13	1.75503e-11	FERM domain containing 3	FRMD3	chr9q21.32
229893_at	6.131	8.671	2.54	1.83163e-12	4.69216e-11	FERM domain containing 3	FRMD3	chr9q21.32
241812_at	4.818	7.351	2.533	8.1668e-14	4.55436e-12	spermatogenesis associated, serine-rich 2-like	SPATS2L	chr2q33.1
212659_s_at	7.56	10.092	2.532	1.33792e-13	6.48427e-12	interleukin 1 receptor antagonist	IL1RN	chr2q14.2
218986_s_at	7.524	10.052	2.528	9.33192e-12	1.66924e-10	DEAD (Asp-Glu-Ala-Asp) box polypeptide 60	DDX60	chr4q32.3
235175_at	6.796	9.318	2.522	2.19239e-13	9.01221e-12	guanylate binding protein 4	GBP4	chr1p22.2
1556314_a_at	5.305	7.825	2.52	7.27381e-12	1.373e-10	zinc finger protein 366	ZNF366	chr5q13.2|5q13.2
208436_s_at	8.917	11.436	2.519	7.46329e-16	1.9096e-13	interferon regulatory factor 7	IRF7	chr11p15.5
226757_at	10.097	12.614	2.517	1.47517e-14	1.24484e-12	interferon-induced protein with tetratricopeptide repeats 2	IFIT2	chr10q23.31
1555464_at	3.85	6.357	2.507	1.00226e-15	1.95977e-13	interferon induced, with helicase C domain 1	IFIH1	chr2q24
1555785_a_at	5.028	7.523	2.495	2.3769e-12	5.77574e-11	5'-3' exoribonuclease 1	XRN1	chr3q23
209498_at	7.857	10.35	2.493	9.16918e-10	6.86527e-09	carcinoembryonic antigen-related cell adhesion molecule 1 (biliary glycoprotein)	CEACAM1	chr19q13.2
210705_s_at	6.538	9.027	2.489	5.10918e-14	3.13226e-12	tripartite motif containing 5	TRIM5	chr11p15
229067_at	6.344	8.828	2.484	1.13457e-12	3.1543e-11	---	---	---
216834_at	4.191	6.66	2.469	8.82718e-09	4.31603e-08	regulator of G-protein signaling 1	RGS1	chr1q31
209417_s_at	9.064	11.53	2.466	1.09102e-16	5.21716e-14	interferon-induced protein 35	IFI35	chr17q21
230036_at	8.318	10.783	2.465	2.7512e-14	1.8975e-12	sterile alpha motif domain containing 9-like	SAMD9L	chr7q21.2
205003_at	6.606	9.064	2.458	4.28718e-10	3.69608e-09	dedicator of cytokinesis 4	DOCK4	chr7q31.1
233811_at	5.191	7.641	2.45	1.37843e-12	3.64846e-11	Ras and Rab interactor 2	RIN2	chr20p11.22
239196_at	6.681	9.129	2.448	2.27698e-10	2.19522e-09	ankyrin repeat domain 22	ANKRD22	chr10q23.31
211889_x_at	6.253	8.692	2.439	2.14764e-10	2.08557e-09	carcinoembryonic antigen-related cell adhesion molecule 1 (biliary glycoprotein)	CEACAM1	chr19q13.2
208087_s_at	7.478	9.899	2.421	2.80983e-15	3.87588e-13	Z-DNA binding protein 1	ZBP1	chr20q13.31
226603_at	9.099	11.505	2.406	6.2785e-14	3.63184e-12	sterile alpha motif domain containing 9-like	SAMD9L	chr7q21.2
239033_at	5.375	7.781	2.406	9.60913e-14	5.18233e-12	---	---	---
209684_at	7.829	10.23	2.401	1.15223e-10	1.26761e-09	Ras and Rab interactor 2	RIN2	chr20p11.22
212657_s_at	10.213	12.61	2.397	1.60909e-14	1.28242e-12	interleukin 1 receptor antagonist	IL1RN	chr2q14.2
235061_at	7.215	9.611	2.396	1.60999e-13	7.40272e-12	protein phosphatase, Mg2+/Mn2+ dependent, 1K	PPM1K	chr4q22.1
206025_s_at	9.558	11.953	2.395	2.18274e-12	5.43628e-11	tumor necrosis factor, alpha-induced protein 6	TNFAIP6	chr2q23.3
220059_at	5.901	8.296	2.395	2.34863e-09	1.45479e-08	signal transducing adaptor family member 1	STAP1	chr4q13.2
212185_x_at	10.675	13.066	2.391	2.2889e-15	3.49318e-13	metallothionein 2A	MT2A	chr16q13
235643_at	6.402	8.793	2.391	2.38346e-12	5.77574e-11	sterile alpha motif domain containing 9-like	SAMD9L	chr7q21.2
204745_x_at	9.04	11.418	2.378	1.22835e-14	1.15931e-12	metallothionein 1G	MT1G	chr16q13
202145_at	8.903	11.276	2.373	6.93438e-12	1.31719e-10	lymphocyte antigen 6 complex, locus E	LY6E	chr8q24.3
231578_at	4.804	7.167	2.363	2.42381e-11	3.52651e-10	guanylate binding protein 1, interferon-inducible	GBP1	chr1p22.2
230314_at	5.381	7.741	2.36	1.8126e-11	2.77839e-10	---	---	---
218543_s_at	9.133	11.491	2.358	3.67308e-15	4.62219e-13	poly(ADP-ribose) polymerase family member 12	PARP12	chr7q34
44673_at	7.303	9.644	2.341	5.15557e-13	1.8307e-11	sialic acid binding Ig-like lectin 1, sialoadhesin	SIGLEC1	chr20p13
206133_at	7.942	10.279	2.337	5.81236e-13	1.97589e-11	XIAP associated factor 1	XAF1	chr17p13.1
202269_x_at	9.27	11.604	2.334	2.0756e-13	8.73558e-12	guanylate binding protein 1, interferon-inducible	GBP1	chr1p22.2
234974_at	7.13	9.464	2.334	1.26515e-18	3.02491e-15	galactose mutarotase (aldose 1-epimerase)	GALM	chr2p22.1
232563_at	3.871	6.203	2.332	8.32618e-11	9.77456e-10	zinc finger protein 684	ZNF684	chr1p34.2
219716_at	7.238	9.567	2.329	1.33943e-14	1.18541e-12	apolipoprotein L, 6	APOL6	chr22q12.3
242961_x_at	8.807	11.127	2.32	1.94866e-14	1.48697e-12	DEAD (Asp-Glu-Ala-Asp) box polypeptide 58	DDX58	chr9p12
235276_at	6.909	9.228	2.319	1.01498e-10	1.1447e-09	epithelial stromal interaction 1 (breast)	EPSTI1	chr13q13.3
212859_x_at	9.313	11.623	2.31	5.26294e-15	6.10012e-13	metallothionein 1E	MT1E	chr16q13
235157_at	7.707	10.013	2.306	7.76702e-13	2.44682e-11	---	---	---
239979_at	8.312	10.618	2.306	2.65897e-10	2.48463e-09	---	---	---
244597_at	4.841	7.142	2.301	1.89011e-14	1.4578e-12	---	---	---
223484_at	4.024	6.321	2.297	1.2156e-09	8.70193e-09	chromosome 15 open reading frame 48	C15orf48	chr15q21.1
206513_at	8.046	10.335	2.289	8.205e-12	1.51294e-10	absent in melanoma 2	AIM2	chr1q22
228362_s_at	5.418	7.706	2.288	1.56095e-11	2.48811e-10	family with sequence similarity 26, member F	FAM26F	chr6q22.1
216336_x_at	9.01	11.296	2.286	1.38923e-14	1.19508e-12	metallothionein 1E	MT1E	chr16q13
202760_s_at	5.554	7.825	2.271	2.85077e-12	6.63902e-11	A kinase (PRKA) anchor protein 2 /// PALM2-AKAP2 readthrough	AKAP2 /// PALM2-AKAP2	chr9q31.3
203595_s_at	8.663	10.927	2.264	1.9499e-13	8.47659e-12	interferon-induced protein with tetratricopeptide repeats 5	IFIT5	chr10q23.31
207777_s_at	7.591	9.85	2.259	2.639e-15	3.78584e-13	SP140 nuclear body protein	SP140	chr2q37.1
1557236_at	4.237	6.49	2.253	7.91132e-11	9.41075e-10	apolipoprotein L, 6	APOL6	chr22q12.3
219364_at	6.729	8.982	2.253	1.31366e-14	1.18541e-12	DEXH (Asp-Glu-X-His) box polypeptide 58	DHX58	chr17q21.2
231956_at	8.374	10.627	2.253	3.48791e-12	7.86899e-11	ring finger protein 213	RNF213	chr17q25.3
206576_s_at	6.494	8.733	2.239	8.45222e-10	6.46769e-09	carcinoembryonic antigen-related cell adhesion molecule 1 (biliary glycoprotein)	CEACAM1	chr19q13.2
200878_at	6.567	8.789	2.222	2.1269e-10	2.07282e-09	endothelial PAS domain protein 1	EPAS1	chr2p21-p16
214933_at	6.489	8.706	2.217	8.73516e-16	1.92027e-13	calcium channel, voltage-dependent, P/Q type, alpha 1A subunit	CACNA1A	chr19p13
217933_s_at	9.469	11.681	2.212	6.46271e-16	1.78293e-13	leucine aminopeptidase 3	LAP3	chr4p15.32
219691_at	6.961	9.153	2.192	1.6791e-13	7.62277e-12	sterile alpha motif domain containing 9	SAMD9	chr7q21.2
209568_s_at	6.665	8.855	2.19	1.11381e-14	1.07962e-12	ral guanine nucleotide dissociation stimulator-like 1	RGL1	chr1q25.3
242234_at	7.429	9.619	2.19	1.24389e-11	2.08483e-10	XIAP associated factor 1	XAF1	chr17p13.1
33304_at	9.978	12.159	2.181	4.83231e-17	2.90278e-14	interferon stimulated exonuclease gene 20kDa	ISG20	chr15q26
230166_at	5.213	7.378	2.165	1.32927e-14	1.18541e-12	KIAA1958	KIAA1958	chr9q32
1554948_at	6.733	8.894	2.161	2.57954e-11	3.72287e-10	---	---	---
1559585_at	5.061	7.22	2.159	3.65728e-11	4.97783e-10	DEAD (Asp-Glu-Ala-Asp) box polypeptide 60-like	DDX60L	chr4q32.3
221865_at	6.602	8.76	2.158	2.82273e-16	9.64144e-14	chromosome 9 open reading frame 91	C9orf91	chr9q32
241916_at	7.069	9.225	2.156	5.73744e-10	4.67127e-09	---	---	---
228531_at	8.482	10.633	2.151	2.04206e-14	1.51005e-12	sterile alpha motif domain containing 9	SAMD9	chr7q21.2
204698_at	10.44	12.587	2.147	3.18048e-17	2.85164e-14	interferon stimulated exonuclease gene 20kDa	ISG20	chr15q26
211122_s_at	3.181	5.327	2.146	1.89087e-07	5.3524e-07	chemokine (C-X-C motif) ligand 11	CXCL11	chr4q21.2
206026_s_at	9.491	11.635	2.144	2.50711e-11	3.63296e-10	tumor necrosis factor, alpha-induced protein 6	TNFAIP6	chr2q23.3
222068_s_at	6.1	8.241	2.141	4.87925e-09	2.66146e-08	dynein, axonemal, assembly factor 1	DNAAF1	chr16q24.1
1556202_at	5.726	7.861	2.135	2.42471e-12	5.83627e-11	SLIT-ROBO Rho GTPase activating protein 2	SRGAP2	chr1q32.1
202411_at	8.225	10.358	2.133	2.27688e-05	2.79462e-05	interferon, alpha-inducible protein 27	IFI27	chr14q32
235574_at	5.462	7.592	2.13	1.57894e-12	4.10345e-11	guanylate binding protein 4	GBP4	chr1p22.2
206553_at	6.036	8.164	2.128	1.09351e-15	2.06411e-13	2'-5'-oligoadenylate synthetase 2	OAS2	chr12q24.2
228966_at	4.437	6.56	2.123	8.80152e-13	2.6638e-11	pantothenate kinase 2	PANK2	chr20p13
229543_at	6.776	8.896	2.12	4.78413e-11	6.1498e-10	---	---	---
214329_x_at	8.471	10.589	2.118	3.21883e-11	4.50942e-10	tumor necrosis factor (ligand) superfamily, member 10	TNFSF10	chr3q26
205170_at	6.687	8.801	2.114	2.22961e-13	9.08675e-12	signal transducer and activator of transcription 2	STAT2	chr12q13.3
231577_s_at	9.18	11.288	2.108	2.7901e-13	1.11183e-11	guanylate binding protein 1, interferon-inducible	GBP1	chr1p22.2
236692_at	6	8.096	2.096	3.71488e-13	1.40244e-11	---	---	---
211883_x_at	6.675	8.766	2.091	2.67804e-10	2.48915e-09	carcinoembryonic antigen-related cell adhesion molecule 1 (biliary glycoprotein)	CEACAM1	chr19q13.2
220104_at	7.99	10.073	2.083	2.10858e-10	2.05776e-09	zinc finger CCCH-type, antiviral 1	ZC3HAV1	chr7q34
225834_at	4.897	6.978	2.081	2.07829e-10	2.03374e-09	family with sequence similarity 72, member A /// family with sequence similarity 72, member B /// family with sequence similarity 72, member C /// family with sequence similarity 72, member D	FAM72A /// FAM72B /// FAM72C /// FAM72D	chr1p11.2 /// chr1q21.1 /// chr1q32.1
202270_at	8.758	10.832	2.074	2.30112e-11	3.37539e-10	guanylate binding protein 1, interferon-inducible	GBP1	chr1p22.2
242060_x_at	6.36	8.426	2.066	1.15296e-13	5.82395e-12	PHD finger protein 11	PHF11	chr13q14.2
233591_at	3.837	5.898	2.061	9.38446e-07	1.99034e-06	uncharacterized LOC101930164	LOC101930164	---
204326_x_at	8.884	10.941	2.057	6.41424e-13	2.15038e-11	metallothionein 1X	MT1X	chr16q13
224701_at	9.722	11.779	2.057	1.97175e-14	1.48874e-12	poly(ADP-ribose) polymerase family member 14	PARP14	chr3q21.1
209999_x_at	5.317	7.373	2.056	1.80602e-11	2.77839e-10	suppressor of cytokine signaling 1	SOCS1	chr16p13.13
228617_at	9.769	11.812	2.043	6.44556e-13	2.15038e-11	XIAP associated factor 1	XAF1	chr17p13.1
1554453_at	4.526	6.563	2.037	4.22607e-14	2.75573e-12	heterogeneous nuclear ribonucleoprotein L-like	HNRNPLL	chr2p22.1
209392_at	4.585	6.619	2.034	1.29945e-09	9.16496e-09	ectonucleotide pyrophosphatase/phosphodiesterase 2	ENPP2	chr8q24.1
209593_s_at	8.552	10.585	2.033	4.52524e-14	2.89812e-12	torsin family 1, member B (torsin B)	TOR1B	chr9q34
200923_at	6.589	8.621	2.032	6.89737e-10	5.43072e-09	lectin, galactoside-binding, soluble, 3 binding protein	LGALS3BP	chr17q25
213361_at	7.962	9.992	2.03	4.5106e-15	5.48372e-13	tudor domain containing 7	TDRD7	chr9q22.33
242868_at	5.024	7.054	2.03	6.36848e-10	5.09824e-09	---	---	---
228230_at	7.225	9.254	2.029	2.78507e-12	6.5342e-11	helicase with zinc finger 2, transcriptional coactivator	HELZ2	chr20q13.33
236156_at	5.047	7.073	2.026	4.68058e-11	6.06014e-10	lipase A, lysosomal acid, cholesterol esterase /// uncharacterized LOC101926887	LIPA /// LOC101926887	chr10q23.2-q23.3
222816_s_at	8.103	10.119	2.016	2.05127e-10	2.01279e-09	zinc finger, CCHC domain containing 2	ZCCHC2	chr18q21.33
232666_at	5.435	7.448	2.013	2.04062e-13	8.71254e-12	2'-5'-oligoadenylate synthetase 3	OAS3	chr12q24.2
1568957_x_at	6.413	8.418	2.005	3.09497e-13	1.2131e-11	SLIT-ROBO Rho GTPase activating protein 2B /// SLIT-ROBO Rho GTPase activating protein 2C	SRGAP2B /// SRGAP2C	chr1p11.2 /// chr1q21.1
223599_at	4.584	6.579	1.995	1.71746e-10	1.74739e-09	tripartite motif containing 6	TRIM6	chr11p15.4
203596_s_at	7.859	9.853	1.994	7.81169e-13	2.44682e-11	interferon-induced protein with tetratricopeptide repeats 5	IFIT5	chr10q23.31
226694_at	6.549	8.536	1.987	1.65541e-11	2.58131e-10	A kinase (PRKA) anchor protein 2 /// PALM2-AKAP2 readthrough	AKAP2 /// PALM2-AKAP2	chr9q31.3
220146_at	5.81	7.796	1.986	3.42858e-11	4.73435e-10	toll-like receptor 7	TLR7	chrXp22.3
205698_s_at	7.468	9.453	1.985	4.95038e-12	1.02658e-10	mitogen-activated protein kinase kinase 6	MAP2K6	chr17q24.3
1557071_s_at	6.833	8.816	1.983	2.52187e-14	1.8089e-12	negative regulator of ubiquitin-like proteins 1	NUB1	chr7q36
216020_at	3.766	5.74	1.974	1.72718e-13	7.79172e-12	interferon induced, with helicase C domain 1	IFIH1	chr2q24
232155_at	5.349	7.323	1.974	3.88522e-12	8.52237e-11	ring finger protein 213	RNF213	chr17q25.3
215617_at	3.662	5.628	1.966	1.14634e-09	8.28884e-09	spermatogenesis associated, serine-rich 2-like	SPATS2L	chr2q33.1
233425_at	7.401	9.366	1.965	6.61399e-11	8.03242e-10	---	---	---
243271_at	9.948	11.912	1.964	8.60307e-14	4.71058e-12	---	---	---
202687_s_at	10.358	12.321	1.963	1.39953e-14	1.19508e-12	tumor necrosis factor (ligand) superfamily, member 10	TNFSF10	chr3q26
225931_s_at	8.698	10.657	1.959	3.92569e-14	2.63163e-12	ring finger protein 213	RNF213	chr17q25.3
231769_at	8.089	10.046	1.957	1.75779e-13	7.88023e-12	F-box protein 6	FBXO6	chr1p36.22
226537_at	4.848	6.804	1.956	1.30836e-09	9.21342e-09	histidine triad nucleotide binding protein 3	HINT3	chr6q22.32
201641_at	8.672	10.617	1.945	1.91671e-12	4.85807e-11	bone marrow stromal cell antigen 2	BST2	chr19p13.1
230000_at	7.342	9.281	1.939	1.44911e-11	2.35697e-10	ring finger protein 213	RNF213	chr17q25.3
219062_s_at	8.107	10.041	1.934	2.34296e-12	5.71624e-11	zinc finger, CCHC domain containing 2	ZCCHC2	chr18q21.33
228714_at	5.177	7.11	1.933	2.03884e-11	3.05309e-10	uncharacterized LOC101927027	LOC101927027	chr2q31.2
231426_at	5.223	7.155	1.932	8.04913e-09	4.00792e-08	transmembrane protein 252	TMEM252	chr9q21.11
205875_s_at	8.704	10.635	1.931	4.61956e-17	2.90278e-14	three prime repair exonuclease 1	TREX1	chr3p21.31
222217_s_at	7.579	9.504	1.925	1.58331e-16	6.30938e-14	solute carrier family 27 (fatty acid transporter), member 3	SLC27A3	chr1q21.3
226184_at	5.793	7.715	1.922	1.04032e-09	7.64559e-09	formin like 2	FMNL2	chr2q23.3
202686_s_at	4.64	6.558	1.918	8.16928e-11	9.66842e-10	AXL receptor tyrosine kinase	AXL	chr19q13.1
228304_at	6.779	8.695	1.916	6.45053e-16	1.78293e-13	RNA binding motif protein 43	RBM43	chr2q23.3
232095_at	7.154	9.061	1.907	4.21263e-13	1.57158e-11	SLIT-ROBO Rho GTPase activating protein 2B	SRGAP2B	chr1q21.1
220576_at	4.646	6.552	1.906	3.35548e-13	1.294e-11	post-GPI attachment to proteins 1	PGAP1	chr2q33.1
241869_at	6.595	8.501	1.906	4.16306e-10	3.60641e-09	apolipoprotein L, 6	APOL6	chr22q12.3
219885_at	5.709	7.612	1.903	2.10151e-13	8.76386e-12	schlafen family member 12	SLFN12	chr17q12
200730_s_at	6.477	8.379	1.902	1.64418e-10	1.68914e-09	protein tyrosine phosphatase type IVA, member 1	PTP4A1	chr6q12
211012_s_at	7.376	9.276	1.9	2.00165e-12	5.03512e-11	promyelocytic leukemia	PML	chr15q22
229391_s_at	8.14	10.037	1.897	1.77894e-11	2.7441e-10	family with sequence similarity 26, member F	FAM26F	chr6q22.1
225929_s_at	9.522	11.417	1.895	1.72164e-11	2.67296e-10	ring finger protein 213	RNF213	chr17q25.3
228152_s_at	9.218	11.11	1.892	8.00203e-12	1.49084e-10	DEAD (Asp-Glu-Ala-Asp) box polypeptide 60-like	DDX60L	chr4q32.3
1552323_s_at	4.479	6.37	1.891	1.51096e-10	1.60562e-09	family with sequence similarity 122C	FAM122C	chrXq26.3
200628_s_at	9.225	11.112	1.887	1.41197e-12	3.70598e-11	tryptophanyl-tRNA synthetase	WARS	chr14q32.31
223434_at	8.027	9.914	1.887	9.09914e-11	1.051e-09	guanylate binding protein 3	GBP3	chr1p22.2
243999_at	5.801	7.685	1.884	1.37353e-10	1.47708e-09	schlafen family member 5	SLFN5	chr17q12
230233_at	4.905	6.786	1.881	1.10367e-10	1.22546e-09	---	---	---
241991_at	5.286	7.166	1.88	1.71059e-11	2.66157e-10	---	---	---
243788_at	5.306	7.185	1.879	6.64001e-11	8.04525e-10	---	---	---
205801_s_at	5.07	6.948	1.878	1.56469e-11	2.48853e-10	RAS guanyl releasing protein 3 (calcium and DAG-regulated)	RASGRP3	chr2p25.1-p24.1
225636_at	10.26	12.136	1.876	1.59953e-14	1.28242e-12	signal transducer and activator of transcription 2	STAT2	chr12q13.3
228620_at	4.365	6.237	1.872	1.00212e-11	1.75747e-10	uncharacterized LOC101927027	LOC101927027	chr2q31.2
203593_at	6.867	8.736	1.869	5.20403e-09	2.80239e-08	CD2-associated protein	CD2AP	chr6p12
212380_at	8.16	10.028	1.868	2.38218e-17	2.85164e-14	cap methyltransferase 1	CMTR1	chr6p21.2
217929_s_at	8.605	10.469	1.864	1.40309e-13	6.75446e-12	KIAA0319-like	KIAA0319L	chr1p34.2
233072_at	7.345	9.207	1.862	3.29272e-10	2.95228e-09	netrin G2	NTNG2	chr9q34
229548_at	6.989	8.846	1.857	2.20497e-09	1.3838e-08	---	---	---
201646_at	6.243	8.096	1.853	2.73151e-10	2.53464e-09	scavenger receptor class B, member 2	SCARB2	chr4q21.1
202446_s_at	10.291	12.137	1.846	8.70216e-11	1.01495e-09	phospholipid scramblase 1	PLSCR1	chr3q23
221766_s_at	9.311	11.153	1.842	9.03158e-17	4.62731e-14	family with sequence similarity 46, member A	FAM46A	chr6q14
1557078_at	4.741	6.582	1.841	2.00107e-09	1.285e-08	schlafen family member 5	SLFN5	chr17q12
242471_at	8.384	10.223	1.839	1.9311e-13	8.44605e-12	---	---	---
242600_at	6.388	8.224	1.836	1.61638e-10	1.67302e-09	FERM domain containing 3	FRMD3	chr9q21.32
223167_s_at	5.822	7.654	1.832	1.61966e-09	1.08881e-08	ubiquitin specific peptidase 25	USP25	chr21q11.2
228628_at	7.197	9.029	1.832	1.99203e-13	8.55603e-12	SLIT-ROBO Rho GTPase activating protein 2B	SRGAP2B	chr1q21.1
223298_s_at	9.869	11.697	1.828	6.90844e-15	7.62358e-13	5'-nucleotidase, cytosolic IIIA	NT5C3A	chr7p14.3
233999_s_at	4.396	6.224	1.828	8.88788e-10	6.70364e-09	tetratricopeptide repeat domain 26	TTC26	chr7q34
204224_s_at	9.647	11.471	1.824	4.22924e-11	5.59701e-10	GTP cyclohydrolase 1	GCH1	chr14q22.1-q22.2
239186_at	5.796	7.618	1.822	7.57803e-13	2.41583e-11	serpin peptidase inhibitor, clade B (ovalbumin), member 9, pseudogene 1	SERPINB9P1	chr6p25.2
AFFX-HUMISGF3A/M97935_MB_at	7.111	8.932	1.821	1.10922e-11	1.91717e-10	signal transducer and activator of transcription 1	STAT1	chr2q32.2
229450_at	11.526	13.346	1.82	4.09146e-12	8.8396e-11	interferon-induced protein with tetratricopeptide repeats 3	IFIT3	chr10q24
239582_at	5.605	7.424	1.819	1.05074e-12	3.02683e-11	promyelocytic leukemia	PML	chr15q22
1556203_a_at	6.156	7.974	1.818	4.53836e-12	9.63107e-11	SLIT-ROBO Rho GTPase activating protein 2	SRGAP2	chr1q32.1
229390_at	9.58	11.394	1.814	1.99906e-11	3.01622e-10	family with sequence similarity 26, member F	FAM26F	chr6q22.1
226773_at	8.565	10.375	1.81	5.37058e-15	6.11467e-13	protein phosphatase, Mg2+/Mn2+ dependent, 1K	PPM1K	chr4q22.1
202479_s_at	6.244	8.053	1.809	4.01164e-11	5.37849e-10	tribbles pseudokinase 2	TRIB2	chr2p24.3
202759_s_at	6.59	8.398	1.808	2.19876e-13	9.01221e-12	A kinase (PRKA) anchor protein 2 /// PALM2-AKAP2 readthrough	AKAP2 /// PALM2-AKAP2	chr9q31.3
202779_s_at	6.974	8.782	1.808	4.95547e-14	3.06422e-12	ubiquitin-conjugating enzyme E2S /// ubiquitin conjugating enzyme E2S pseudogene 1	UBE2S /// UBE2SP1	chr17p11.2 /// chr19q13.43
241956_at	7.365	9.172	1.807	1.09526e-12	3.06882e-11	---	---	---
217165_x_at	8.745	10.539	1.794	2.31966e-13	9.40033e-12	metallothionein 1F	MT1F	chr16q13
225447_at	7.114	8.896	1.782	6.90268e-14	3.96096e-12	glycerol-3-phosphate dehydrogenase 2	GPD2	chr2q24.1
241237_at	6.516	8.288	1.772	1.7689e-11	2.7345e-10	---	---	---
58916_at	3.965	5.735	1.77	2.4314e-10	2.32056e-09	potassium channel tetramerization domain containing 14 /// NDUFC2-KCTD14 readthrough	KCTD14 /// NDUFC2-KCTD14	chr11q14.1
233220_at	4.999	6.768	1.769	6.12492e-11	7.55217e-10	glutamate receptor, ionotropic, N-methyl-D-aspartate 3A	GRIN3A	chr9q31.1
AFFX-HUMISGF3A/M97935_MA_at	8.15	9.917	1.767	2.1323e-11	3.16661e-10	signal transducer and activator of transcription 1	STAT1	chr2q32.2
229138_at	5.726	7.491	1.765	8.18186e-11	9.66842e-10	poly(ADP-ribose) polymerase family member 11	PARP11	chr12p13.3
220615_s_at	8.232	9.996	1.764	3.40678e-12	7.73302e-11	fatty acyl-CoA reductase 2	FAR2	chr12p11.22
243196_s_at	6.456	8.217	1.761	6.3154e-12	1.23432e-10	TRAF-type zinc finger domain containing 1	TRAFD1	chr12q
201649_at	10.467	12.224	1.757	1.26916e-15	2.27587e-13	ubiquitin-conjugating enzyme E2L 6	UBE2L6	chr11q12
212735_at	7.12	8.872	1.752	2.14153e-14	1.56744e-12	RUN domain and cysteine-rich domain containing, Beclin 1-interacting protein	RUBCN	chr3q29
232961_at	3.822	5.574	1.752	6.65416e-07	1.49566e-06	spermatogenesis associated, serine-rich 2-like	SPATS2L	chr2q33.1
235508_at	7.132	8.88	1.748	2.77306e-15	3.87588e-13	promyelocytic leukemia	PML	chr15q22
209795_at	5.626	7.371	1.745	2.89408e-07	7.64035e-07	CD69 molecule	CD69	chr12p13
203610_s_at	8.405	10.142	1.737	5.27276e-15	6.10012e-13	tripartite motif containing 38	TRIM38	chr6p21.3
210770_s_at	4.581	6.318	1.737	3.75291e-10	3.31109e-09	calcium channel, voltage-dependent, P/Q type, alpha 1A subunit	CACNA1A	chr19p13
202478_at	8.075	9.807	1.732	4.47774e-11	5.85673e-10	tribbles pseudokinase 2	TRIB2	chr2p24.3
225386_s_at	8.057	9.789	1.732	1.21677e-13	6.06092e-12	heterogeneous nuclear ribonucleoprotein L-like	HNRNPLL	chr2p22.1
227649_s_at	8.197	9.926	1.729	1.18495e-12	3.27192e-11	SLIT-ROBO Rho GTPase activating protein 2	SRGAP2	chr1q32.1
1560026_at	5.228	6.956	1.728	5.18414e-12	1.06243e-10	---	---	---
213294_at	9.217	10.944	1.727	5.08705e-12	1.04853e-10	eukaryotic translation initiation factor 2-alpha kinase 2	EIF2AK2	chr2p22-p21
222631_at	6.947	8.672	1.725	2.73555e-12	6.45451e-11	phosphatidylinositol 4-kinase type 2 beta	PI4K2B	chr4p15.2
1569030_s_at	7.228	8.952	1.724	1.0659e-14	1.04734e-12	negative regulator of ubiquitin-like proteins 1	NUB1	chr7q36
202430_s_at	9.252	10.973	1.721	1.61108e-09	1.08728e-08	phospholipid scramblase 1	PLSCR1	chr3q23
214770_at	3.824	5.545	1.721	1.04704e-07	3.31434e-07	macrophage scavenger receptor 1	MSR1	chr8p22
210397_at	5.223	6.943	1.72	1.67233e-07	4.85644e-07	defensin, beta 1	DEFB1	chr8p23.1
209546_s_at	8.065	9.779	1.714	1.0493e-12	3.02683e-11	apolipoprotein L1	APOL1	chr22q13.1
1554937_x_at	6.276	7.982	1.706	3.55985e-15	4.55969e-13	exocyst complex component 3-like 1	EXOC3L1	chr16q22.1
201798_s_at	7.369	9.073	1.704	1.71002e-12	4.41214e-11	myoferlin	MYOF	chr10q24
201647_s_at	4.527	6.225	1.698	2.94868e-11	4.16348e-10	scavenger receptor class B, member 2	SCARB2	chr4q21.1
222468_at	9.729	11.426	1.697	1.07716e-13	5.6811e-12	KIAA0319-like	KIAA0319L	chr1p34.2
238581_at	8.068	9.764	1.696	9.32483e-09	4.51931e-08	guanylate binding protein 5	GBP5	chr1p22.2
222512_at	9.487	11.182	1.695	1.73119e-16	6.53556e-14	negative regulator of ubiquitin-like proteins 1	NUB1	chr7q36
229804_x_at	5.763	7.457	1.694	8.68026e-08	2.86563e-07	COBW domain containing 2	CBWD2	chr2q13
204994_at	10.642	12.331	1.689	4.75488e-13	1.74011e-11	MX dynamin-like GTPase 2	MX2	chr21q22.3
216202_s_at	7.389	9.07	1.681	7.3748e-11	8.84589e-10	serine palmitoyltransferase, long chain base subunit 2	SPTLC2	chr14q24.3
208912_s_at	8.796	10.475	1.679	1.25328e-16	5.6185e-14	2',3'-cyclic nucleotide 3' phosphodiesterase	CNP	chr17q21
211864_s_at	5.291	6.963	1.672	6.88243e-12	1.31719e-10	myoferlin	MYOF	chr10q24
212733_at	9.046	10.718	1.672	1.33618e-14	1.18541e-12	RUN domain and cysteine-rich domain containing, Beclin 1-interacting protein	RUBCN	chr3q29
AFFX-HUMISGF3A/M97935_5_at	5.142	6.811	1.669	1.33031e-10	1.43707e-09	signal transducer and activator of transcription 1	STAT1	chr2q32.2
225557_at	8.304	9.97	1.666	1.39985e-12	3.69151e-11	cysteine-serine-rich nuclear protein 1	CSRNP1	chr3p22
230405_at	9.605	11.268	1.663	9.0167e-16	1.92027e-13	chromosome 5 open reading frame 56	C5orf56	chr5q31.1
201015_s_at	6.94	8.601	1.661	3.95089e-12	8.61374e-11	junction plakoglobin	JUP	chr17q21
223220_s_at	9.34	11	1.66	6.01857e-12	1.19255e-10	poly(ADP-ribose) polymerase family member 9	PARP9	chr3q21
200629_at	10.196	11.852	1.656	6.12195e-13	2.07132e-11	tryptophanyl-tRNA synthetase	WARS	chr14q32.31
207759_s_at	6.418	8.071	1.653	1.97562e-10	1.9546e-09	disrupted in schizophrenia 1 /// TSNAX-DISC1 readthrough (NMD candidate)	DISC1 /// TSNAX-DISC1	chr1q42.1
241692_at	4.664	6.317	1.653	6.07519e-12	1.19716e-10	---	---	---
205692_s_at	7.127	8.779	1.652	3.72857e-11	5.05567e-10	CD38 molecule	CD38	chr4p15
210889_s_at	8.086	9.733	1.647	1.50808e-08	6.74907e-08	Fc fragment of IgG, low affinity IIb, receptor (CD32)	FCGR2B	chr1q23
204211_x_at	6.859	8.503	1.644	5.19769e-09	2.80239e-08	eukaryotic translation initiation factor 2-alpha kinase 2	EIF2AK2	chr2p22-p21
229569_at	6.239	7.867	1.628	1.82797e-10	1.83468e-09	---	---	---
202688_at	11.219	12.846	1.627	1.04873e-14	1.04478e-12	tumor necrosis factor (ligand) superfamily, member 10	TNFSF10	chr3q26
219439_at	6.325	7.949	1.624	1.88211e-11	2.87236e-10	core 1 synthase, glycoprotein-N-acetylgalactosamine 3-beta-galactosyltransferase 1	C1GALT1	chr7p21.3
225814_at	8.904	10.524	1.62	1.95949e-11	2.96523e-10	5'-3' exoribonuclease 1	XRN1	chr3q23
229625_at	8.889	10.509	1.62	1.06607e-09	7.78696e-09	guanylate binding protein 5	GBP5	chr1p22.2
219607_s_at	7.554	9.172	1.618	1.10184e-06	2.27238e-06	membrane-spanning 4-domains, subfamily A, member 4A	MS4A4A	chr11q12
206637_at	7.145	8.758	1.613	5.77693e-06	8.92849e-06	purinergic receptor P2Y, G-protein coupled, 14	P2RY14	chr3q24-q25.1
1556643_at	7.1	8.709	1.609	9.77252e-12	1.72653e-10	BST2 interferon stimulated positive regulator (non-protein coding)	BISPR	---
1552623_at	7.113	8.721	1.608	1.33438e-12	3.54494e-11	hematopoietic SH2 domain containing	HSH2D	chr19p13.12
1554343_a_at	4.459	6.066	1.607	3.05298e-08	1.21433e-07	signal transducing adaptor family member 1	STAP1	chr4q13.2
1564276_at	3.974	5.576	1.602	5.78648e-11	7.20584e-10	chromosome 5 open reading frame 56	C5orf56	chr5q31.1
202581_at	7.428	9.03	1.602	3.69264e-08	1.41944e-07	heat shock 70kDa protein 1A /// heat shock 70kDa protein 1B	HSPA1A /// HSPA1B	chr6p21.3
244398_x_at	3.848	5.447	1.599	4.67933e-09	2.57592e-08	zinc finger protein 684	ZNF684	chr1p34.2
205241_at	9.189	10.786	1.597	6.6574e-12	1.28713e-10	SCO2 cytochrome c oxidase assembly protein	SCO2	chr22q13.33
206081_at	5.345	6.938	1.593	3.7237e-07	9.31296e-07	solute carrier family 24 (sodium/potassium/calcium exchanger), member 1	SLC24A1	chr15q22
229350_x_at	8.701	10.287	1.586	5.5029e-14	3.26211e-12	poly(ADP-ribose) polymerase family member 10	PARP10	chr8q24.3
35254_at	8.69	10.276	1.586	1.12267e-11	1.93577e-10	TRAF-type zinc finger domain containing 1	TRAFD1	chr12q
204770_at	6.433	8.018	1.585	8.97106e-12	1.62086e-10	transporter 2, ATP-binding cassette, sub-family B (MDR/TAP)	TAP2	chr6p21.3
211434_s_at	6.111	7.696	1.585	3.74768e-08	1.43752e-07	chemokine (C-C motif) receptor-like 2	CCRL2	chr3p21
233632_s_at	8.732	10.317	1.585	4.91346e-12	1.02452e-10	5'-3' exoribonuclease 1	XRN1	chr3q23
235331_x_at	4.356	5.941	1.585	1.21293e-07	3.73238e-07	polycomb group ring finger 5	PCGF5	chr10q23.32
203258_at	7.831	9.414	1.583	5.05559e-16	1.613e-13	DR1-associated protein 1 (negative cofactor 2 alpha)	DRAP1	chr11q13.3
242898_at	4.865	6.44	1.575	5.39632e-12	1.09652e-10	eukaryotic translation initiation factor 2-alpha kinase 2	EIF2AK2	chr2p22-p21
201138_s_at	7.268	8.842	1.574	7.03317e-11	8.483e-10	Sjogren syndrome antigen B (autoantigen La)	SSB	chr2q31.1
204049_s_at	6.953	8.526	1.573	1.25772e-12	3.40432e-11	phosphatase and actin regulator 2	PHACTR2	chr6q24.2
37943_at	5.86	7.43	1.57	2.70035e-11	3.86612e-10	zinc finger, FYVE domain containing 26	ZFYVE26	chr14q24.1
232222_at	6.006	7.573	1.567	1.63004e-09	1.09476e-08	zinc finger, CCHC domain containing 2	ZCCHC2	chr18q21.33
1559882_at	5.654	7.218	1.564	8.76264e-09	4.29325e-08	SAM domain and HD domain 1	SAMHD1	chr20pter-q12
235756_at	6.279	7.843	1.564	1.84959e-13	8.1894e-12	---	---	---
1555491_a_at	6.475	8.035	1.56	4.27513e-14	2.76261e-12	chromosome 19 open reading frame 66	C19orf66	chr19p13.2
53720_at	9.112	10.672	1.56	9.10226e-16	1.92027e-13	chromosome 19 open reading frame 66	C19orf66	chr19p13.2
210732_s_at	5.332	6.891	1.559	6.80043e-10	5.37801e-09	lectin, galactoside-binding, soluble, 8	LGALS8	chr1q43
208653_s_at	7.613	9.171	1.558	1.41038e-11	2.2992e-10	CD164 molecule, sialomucin	CD164	chr6q21
213329_at	6.463	8.02	1.557	7.43611e-13	2.39185e-11	SLIT-ROBO Rho GTPase activating protein 2	SRGAP2	chr1q32.1
237315_at	5.261	6.815	1.554	6.05224e-11	7.48481e-10	uncharacterized LOC102724965	LOC102724965	---
223767_at	5.766	7.314	1.548	7.37145e-09	3.73935e-08	G protein-coupled receptor 84	GPR84	chr12q13.13
1555728_a_at	6.505	8.047	1.542	1.0894e-07	3.41975e-07	membrane-spanning 4-domains, subfamily A, member 4A	MS4A4A	chr11q12
208934_s_at	7.194	8.736	1.542	4.15414e-11	5.52822e-10	lectin, galactoside-binding, soluble, 8	LGALS8	chr1q43
1569057_s_at	6.397	7.932	1.535	1.10009e-12	3.07035e-11	melanoma inhibitory activity family, member 3	MIA3	chr1q41
204929_s_at	7.861	9.396	1.535	2.80391e-11	4.00638e-10	vesicle associated membrane protein 5	VAMP5	chr2p11.2
211044_at	4.065	5.6	1.535	4.93019e-13	1.75938e-11	tripartite motif containing 14	TRIM14	chr9q22.33
213073_at	7.884	9.419	1.535	3.50511e-13	1.34447e-11	zinc finger, FYVE domain containing 26	ZFYVE26	chr14q24.1
1563075_s_at	7.951	9.482	1.531	9.4882e-11	1.08718e-09	---	---	---
1556352_at	6.526	8.056	1.53	1.31475e-09	9.24562e-09	---	---	---
225869_s_at	6.994	8.524	1.53	5.47688e-13	1.91634e-11	unc-93 homolog B1 (C. elegans)	UNC93B1	chr11q13
1558041_a_at	5.62	7.147	1.527	5.69933e-10	4.6561e-09	KIAA0895-like	KIAA0895L	chr16q22.1
200733_s_at	7.688	9.205	1.517	3.96912e-10	3.47194e-09	protein tyrosine phosphatase type IVA, member 1	PTP4A1	chr6q12
209640_at	4.519	6.036	1.517	1.02347e-12	2.9944e-11	promyelocytic leukemia	PML	chr15q22
225468_at	7.276	8.791	1.515	1.98196e-13	8.55603e-12	protein associated with topoisomerase II homolog 1 (yeast)	PATL1	chr11q12.1
207500_at	6.66	8.173	1.513	2.48137e-08	1.01822e-07	caspase 5	CASP5	chr11q22.2-q22.3
210846_x_at	5.745	7.258	1.513	8.00003e-16	1.9096e-13	tripartite motif containing 14	TRIM14	chr9q22.33
243721_at	4.391	5.901	1.51	9.84929e-13	2.91932e-11	uncharacterized LOC102724470	LOC102724470	---
209457_at	6.306	7.815	1.509	5.30196e-12	1.0804e-10	dual specificity phosphatase 5	DUSP5	chr10q25
209212_s_at	6.114	7.617	1.503	6.11092e-08	2.14803e-07	Kruppel-like factor 5 (intestinal)	KLF5	chr13q22.1
230333_at	7.824	9.326	1.502	3.02477e-08	1.20602e-07	---	---	---
211013_x_at	6.466	7.967	1.501	2.84737e-14	1.94512e-12	promyelocytic leukemia	PML	chr15q22
223501_at	10.312	11.81	1.498	4.85374e-11	6.20592e-10	tumor necrosis factor (ligand) superfamily, member 13b	TNFSF13B	chr13q32-q34
204048_s_at	8.176	9.672	1.496	7.80448e-14	4.44289e-12	phosphatase and actin regulator 2	PHACTR2	chr6q24.2
214967_at	3.977	5.469	1.492	5.82275e-12	1.1732e-10	---	---	---
221241_s_at	5.136	6.62	1.484	7.19167e-12	1.36108e-10	BCL2-like 14 (apoptosis facilitator)	BCL2L14	chr12p13-p12
201139_s_at	7.442	8.925	1.483	4.88936e-10	4.10664e-09	Sjogren syndrome antigen B (autoantigen La)	SSB	chr2q31.1
227947_at	7.61	9.093	1.483	7.03678e-11	8.483e-10	phosphatase and actin regulator 2	PHACTR2	chr6q24.2
233691_at	4.944	6.417	1.473	7.94554e-11	9.42021e-10	---	---	---
208965_s_at	9.385	10.856	1.471	3.60899e-09	2.08689e-08	interferon, gamma-inducible protein 16	IFI16	chr1q22
218085_at	8.455	9.922	1.467	6.85604e-09	3.51519e-08	charged multivesicular body protein 5	CHMP5	chr9p13.3
242109_at	5.005	6.47	1.465	1.03479e-08	4.91223e-08	---	---	---
211967_at	10.318	11.78	1.462	4.90848e-11	6.23148e-10	transmembrane protein 123	TMEM123	chr11q22.1
232517_s_at	5.967	7.429	1.462	6.03753e-10	4.87136e-09	helicase with zinc finger 2, transcriptional coactivator	HELZ2	chr20q13.33
223502_s_at	11.583	13.043	1.46	4.06377e-13	1.52612e-11	tumor necrosis factor (ligand) superfamily, member 13b	TNFSF13B	chr13q32-q34
209969_s_at	10.17	11.627	1.457	6.66346e-13	2.20707e-11	signal transducer and activator of transcription 1	STAT1	chr2q32.2
212305_s_at	7.852	9.306	1.454	1.34668e-14	1.18541e-12	melanoma inhibitory activity family, member 3	MIA3	chr1q41
218429_s_at	9.157	10.611	1.454	4.87464e-13	1.75503e-11	chromosome 19 open reading frame 66	C19orf66	chr19p13.2
201324_at	4.713	6.165	1.452	7.23288e-08	2.45646e-07	epithelial membrane protein 1	EMP1	chr12p12.3
235463_s_at	5.308	6.756	1.448	1.20992e-07	3.72632e-07	ceramide synthase 6	CERS6	chr2q24.3
230695_s_at	4.997	6.441	1.444	1.70535e-12	4.41214e-11	radial spoke head 9 homolog (Chlamydomonas)	RSPH9	chr6p21.1
220315_at	4.193	5.635	1.442	1.07759e-12	3.05511e-11	poly(ADP-ribose) polymerase family member 11	PARP11	chr12p13.3
221680_s_at	6.054	7.495	1.441	2.47919e-10	2.35224e-09	ets variant 7	ETV7	chr6p21
213497_at	6.633	8.073	1.44	5.63502e-12	1.14179e-10	ankyrin repeat and BTB (POZ) domain containing 2	ABTB2	chr11p13
1553055_a_at	4.817	6.256	1.439	1.92457e-07	5.4349e-07	schlafen family member 5	SLFN5	chr17q12
239277_at	7.524	8.961	1.437	1.08762e-12	3.06172e-11	---	---	---
203820_s_at	4.633	6.067	1.434	5.61917e-10	4.60796e-09	insulin-like growth factor 2 mRNA binding protein 3	IGF2BP3	chr7p11
224983_at	8.749	10.181	1.432	1.5015e-13	7.13249e-12	scavenger receptor class B, member 2	SCARB2	chr4q21.1
204249_s_at	9.546	10.977	1.431	5.40337e-13	1.89988e-11	LIM domain only 2 (rhombotin-like 1)	LMO2	chr11p13
1555764_s_at	7.909	9.339	1.43	1.88744e-09	1.22519e-08	translocase of inner mitochondrial membrane 10 homolog (yeast)	TIMM10	chr11q12.1
229194_at	7.803	9.232	1.429	3.12262e-09	1.85723e-08	polycomb group ring finger 5	PCGF5	chr10q23.32
221641_s_at	8.945	10.372	1.427	1.57401e-13	7.37917e-12	acyl-CoA thioesterase 9	ACOT9	chrXp22.11
202863_at	8.723	10.147	1.424	8.73838e-12	1.58682e-10	SP100 nuclear antigen	SP100	chr2q37.1
206503_x_at	6.358	7.781	1.423	3.26698e-15	4.26065e-13	promyelocytic leukemia	PML	chr15q22
244774_at	5.374	6.795	1.421	2.90829e-09	1.75154e-08	phosphatase and actin regulator 2	PHACTR2	chr6q24.2
224900_at	8.413	9.833	1.42	5.14892e-15	6.10012e-13	ankyrin repeat and FYVE domain containing 1	ANKFY1	chr17p13.3
203567_s_at	9.225	10.639	1.414	4.82601e-13	1.75503e-11	tripartite motif containing 38	TRIM38	chr6p21.3
203805_s_at	7.117	8.53	1.413	1.35516e-14	1.18541e-12	Fanconi anemia complementation group A	FANCA	chr16q24.3
239108_at	6.505	7.918	1.413	1.93343e-08	8.27461e-08	fatty acyl-CoA reductase 2	FAR2	chr12p11.22
205773_at	4.381	5.791	1.41	4.40654e-07	1.06782e-06	cytoplasmic polyadenylation element binding protein 3	CPEB3	chr10q23.32
213982_s_at	8.184	9.594	1.41	2.56628e-09	1.5813e-08	RAB GTPase activating protein 1-like	RABGAP1L	chr1q24
210610_at	6.75	8.158	1.408	6.43214e-09	3.33612e-08	carcinoembryonic antigen-related cell adhesion molecule 1 (biliary glycoprotein)	CEACAM1	chr19q13.2
219758_at	4.99	6.398	1.408	1.08103e-10	1.20219e-09	tetratricopeptide repeat domain 26	TTC26	chr7q34
202375_at	5.771	7.178	1.407	1.76732e-10	1.7905e-09	SEC24 homolog D, COPII coat complex component	SEC24D	chr4q26
202837_at	7.908	9.315	1.407	1.89973e-12	4.83208e-11	TRAF-type zinc finger domain containing 1	TRAFD1	chr12q
209282_at	7.965	9.366	1.401	4.63815e-12	9.78495e-11	protein kinase D2	PRKD2	chr19q13.3
216245_at	4.76	6.159	1.399	1.77131e-09	1.16992e-08	interleukin 1 receptor antagonist	IL1RN	chr2q14.2
216766_at	5.235	6.632	1.397	2.48832e-06	4.46209e-06	---	---	---
203753_at	6.525	7.921	1.396	5.5325e-11	6.94989e-10	transcription factor 4	TCF4	chr18q21.1
219403_s_at	8.305	9.7	1.395	2.84385e-11	4.04406e-10	heparanase	HPSE	chr4q21.3
233917_s_at	5.698	7.092	1.394	6.49794e-09	3.36283e-08	Mov10 RISC complex RNA helicase	MOV10	chr1p13.2
226107_at	7.3	8.69	1.39	3.8671e-12	8.50864e-11	core 1 synthase, glycoprotein-N-acetylgalactosamine 3-beta-galactosyltransferase 1	C1GALT1	chr7p21.3
1557116_at	8.569	9.955	1.386	3.70438e-13	1.40244e-11	apolipoprotein L, 6	APOL6	chr22q12.3
230503_at	5.739	7.124	1.385	1.31425e-12	3.52531e-11	---	---	---
233559_s_at	6.444	7.827	1.383	3.27854e-10	2.94325e-09	WD repeat and FYVE domain containing 1	WDFY1	chr2q36.1
244011_at	4.886	6.268	1.382	8.8567e-10	6.69125e-09	protein phosphatase, Mg2+/Mn2+ dependent, 1K	PPM1K	chr4q22.1
213261_at	8.15	9.53	1.38	6.69082e-10	5.30889e-09	tetratricopeptide repeat and ankyrin repeat containing 1	TRANK1	chr3p22.2
34689_at	9.16	10.54	1.38	1.00113e-15	1.95977e-13	three prime repair exonuclease 1	TREX1	chr3p21.31
241347_at	7.87	9.249	1.379	1.08846e-12	3.06172e-11	ring finger protein 213	RNF213	chr17q25.3
218408_at	7.521	8.898	1.377	1.00486e-10	1.13686e-09	translocase of inner mitochondrial membrane 10 homolog (yeast)	TIMM10	chr11q12.1
225466_at	7.344	8.721	1.377	4.92275e-14	3.06422e-12	protein associated with topoisomerase II homolog 1 (yeast)	PATL1	chr11q12.1
212386_at	7.862	9.233	1.371	1.08757e-08	5.12887e-08	transcription factor 4	TCF4	chr18q21.1
214727_at	3.75	5.118	1.368	1.58071e-07	4.63542e-07	breast cancer 2, early onset	BRCA2	chr13q12.3
215754_at	6.813	8.18	1.367	1.01091e-15	1.95977e-13	scavenger receptor class B, member 2	SCARB2	chr4q21.1
219545_at	5.347	6.714	1.367	4.13698e-11	5.52274e-10	potassium channel tetramerization domain containing 14 /// NDUFC2-KCTD14 readthrough	KCTD14 /// NDUFC2-KCTD14	chr11q14.1
203147_s_at	8.611	9.976	1.365	8.98182e-15	9.20363e-13	tripartite motif containing 14	TRIM14	chr9q22.33
208180_s_at	5.675	7.04	1.365	1.73167e-06	3.30611e-06	histone cluster 1, H4h	HIST1H4H	chr6p22.1
239533_at	6.964	8.329	1.365	6.94142e-12	1.31719e-10	G protein-coupled receptor 155	GPR155	chr2q31.1
206090_s_at	7.178	8.542	1.364	2.62832e-10	2.46117e-09	disrupted in schizophrenia 1 /// TSNAX-DISC1 readthrough (NMD candidate)	DISC1 /// TSNAX-DISC1	chr1q42.1
213293_s_at	11.136	12.5	1.364	9.6066e-12	1.7141e-10	tripartite motif containing 22	TRIM22	chr11p15
218999_at	10.104	11.468	1.364	1.90655e-10	1.89148e-09	transmembrane protein 140	TMEM140	chr7q33
221432_s_at	7.788	9.152	1.364	3.4292e-11	4.73435e-10	solute carrier family 25 (mitochondrial iron transporter), member 28	SLC25A28	chr10q24.2
203771_s_at	7.051	8.411	1.36	3.32158e-10	2.97073e-09	biliverdin reductase A	BLVRA	chr7p13
232610_at	5.707	7.066	1.359	5.22768e-13	1.84717e-11	poly(ADP-ribose) polymerase family member 14	PARP14	chr3q21.1
238039_at	6.961	8.318	1.357	1.12599e-13	5.78632e-12	SCAMP1 antisense RNA 1	SCAMP1-AS1	chr5q14.1
205500_at	4.911	6.261	1.35	8.94847e-10	6.74225e-09	complement component 5	C5	chr9q33-q34
209762_x_at	9.861	11.207	1.346	5.2931e-14	3.19048e-12	SP110 nuclear body protein	SP110	chr2q37.1
235949_at	3.762	5.108	1.346	2.45296e-08	1.00887e-07	tetratricopeptide repeat domain 26	TTC26	chr7q34
242814_at	8.042	9.388	1.346	2.69139e-13	1.07849e-11	serpin peptidase inhibitor, clade B (ovalbumin), member 9	SERPINB9	chr6p25
1563497_at	7.914	9.258	1.344	1.37289e-11	2.25345e-10	ubiquitin specific peptidase 25	USP25	chr21q11.2
237459_at	5.308	6.652	1.344	1.2138e-10	1.32518e-09	---	---	---
209213_at	7.338	8.681	1.343	2.03547e-14	1.51005e-12	carbonyl reductase 1	CBR1	chr21q22.13
243993_at	6.876	8.219	1.343	2.64636e-09	1.61955e-08	---	---	---
208751_at	8.171	9.509	1.338	1.55868e-09	1.05973e-08	N-ethylmaleimide-sensitive factor attachment protein, alpha	NAPA	chr19q13.33
213891_s_at	7.146	8.483	1.337	3.7488e-09	2.15289e-08	transcription factor 4	TCF4	chr18q21.1
203236_s_at	8.348	9.683	1.335	8.2831e-11	9.73992e-10	lectin, galactoside-binding, soluble, 9	LGALS9	chr17q11.2
1569190_at	4.535	5.869	1.334	9.80157e-08	3.15412e-07	sodium channel and clathrin linker 1	SCLT1	chr4q28.2
232034_at	9.13	10.463	1.333	1.28366e-10	1.3972e-09	long intergenic non-protein coding RNA 537	LINC00537	chr9q21.11
201935_s_at	6.958	8.29	1.332	7.5e-10	5.82213e-09	eukaryotic translation initiation factor 4 gamma, 3	EIF4G3	chr1p36.12
210190_at	6.853	8.185	1.332	7.42655e-07	1.64109e-06	syntaxin 11	STX11	chr6q24.2
215209_at	5.222	6.554	1.332	1.79212e-09	1.18149e-08	SEC24 homolog D, COPII coat complex component	SEC24D	chr4q26
1565913_at	4.962	6.291	1.329	4.25016e-08	1.59695e-07	---	---	---
227066_at	7.279	8.607	1.328	6.41955e-13	2.15038e-11	MOB kinase activator 3C	MOB3C	chr1p33
232375_at	8.574	9.902	1.328	2.57037e-12	6.12523e-11	---	---	---
226326_at	7.877	9.204	1.327	9.09851e-11	1.051e-09	polycomb group ring finger 5	PCGF5	chr10q23.32
221345_at	10.549	11.875	1.326	3.52294e-07	8.94499e-07	free fatty acid receptor 2	FFAR2	chr19q13.1
214791_at	8.34	9.665	1.325	8.86106e-15	9.20363e-13	SP140 nuclear body protein-like	SP140L	chr2q37.1
1562955_at	6.43	7.753	1.323	5.70464e-11	7.11628e-10	---	---	---
227807_at	8.448	9.771	1.323	2.61378e-10	2.45396e-09	poly(ADP-ribose) polymerase family member 9	PARP9	chr3q21
1563076_x_at	5.586	6.908	1.322	9.13552e-10	6.85361e-09	---	---	---
215749_s_at	7.255	8.577	1.322	1.58328e-11	2.51253e-10	golgi reassembly stacking protein 1	GORASP1	chr3p22-p21.33
210218_s_at	7.469	8.789	1.32	2.44255e-11	3.54658e-10	SP100 nuclear antigen	SP100	chr2q37.1
221816_s_at	10.536	11.855	1.319	7.98254e-15	8.42025e-13	PHD finger protein 11	PHF11	chr13q14.2
221918_at	7.756	9.075	1.319	7.51327e-09	3.79252e-08	cyclin-dependent kinase 17	CDK17	chr12q23.1
205842_s_at	7.159	8.474	1.315	4.88186e-07	1.16027e-06	Janus kinase 2	JAK2	chr9p24
244840_x_at	5.816	7.13	1.314	6.48433e-09	3.35821e-08	dedicator of cytokinesis 4	DOCK4	chr7q31.1
203127_s_at	8.436	9.744	1.308	1.16039e-11	1.97703e-10	serine palmitoyltransferase, long chain base subunit 2	SPTLC2	chr14q24.3
212382_at	5.91	7.218	1.308	5.39493e-09	2.89e-08	transcription factor 4	TCF4	chr18q21.1
219356_s_at	9.01	10.318	1.308	7.46499e-09	3.77879e-08	charged multivesicular body protein 5	CHMP5	chr9p13.3
243598_at	5.547	6.855	1.308	1.47035e-09	1.01375e-08	---	---	---
244642_at	7.555	8.862	1.307	1.55031e-11	2.47666e-10	---	---	---
212418_at	8.445	9.749	1.304	1.15667e-06	2.36258e-06	E74-like factor 1 (ets domain transcription factor)	ELF1	chr13q13
213988_s_at	10.688	11.992	1.304	2.01803e-12	5.04358e-11	spermidine/spermine N1-acetyltransferase 1	SAT1	chrXp22.1
200731_s_at	6.874	8.176	1.302	6.50619e-11	7.92326e-10	protein tyrosine phosphatase type IVA, member 1	PTP4A1	chr6q12
210007_s_at	4.473	5.775	1.302	2.04562e-09	1.30426e-08	glycerol-3-phosphate dehydrogenase 2	GPD2	chr2q24.1
225973_at	8.812	10.113	1.301	4.06347e-10	3.52866e-09	transporter 2, ATP-binding cassette, sub-family B (MDR/TAP)	TAP2	chr6p21.3
216252_x_at	6.989	8.289	1.3	8.13623e-06	1.1886e-05	Fas cell surface death receptor	FAS	chr10q24.1
225076_s_at	9.878	11.174	1.296	1.27857e-12	3.44774e-11	zinc finger, NFX1-type containing 1	ZNFX1	chr20q13.13
234157_at	6.148	7.443	1.295	2.62159e-10	2.45808e-09	---	---	---
208392_x_at	8.868	10.162	1.294	3.98406e-12	8.63685e-11	SP110 nuclear body protein	SP110	chr2q37.1
1559883_s_at	6.97	8.262	1.292	1.10282e-06	2.27334e-06	SAM domain and HD domain 1	SAMHD1	chr20pter-q12
220419_s_at	8.497	9.789	1.292	6.75973e-13	2.22416e-11	ubiquitin specific peptidase 25	USP25	chr21q11.2
225710_at	9.387	10.679	1.292	3.20718e-11	4.50189e-10	guanine nucleotide binding protein (G protein), beta polypeptide 4	GNB4	chr3q26.33
225415_at	9.956	11.247	1.291	7.52112e-13	2.40839e-11	deltex 3 like, E3 ubiquitin ligase	DTX3L	chr3q21.1
212779_at	8.706	9.995	1.289	1.96877e-08	8.37587e-08	KIAA1109	KIAA1109	chr4q27
226456_at	5.422	6.71	1.288	8.47157e-11	9.89665e-10	RecQ mediated genome instability 2	RMI2	chr16p13.13
203148_s_at	8.707	9.992	1.285	9.32248e-13	2.7862e-11	tripartite motif containing 14	TRIM14	chr9q22.33
244509_at	6.318	7.603	1.285	5.1043e-10	4.21317e-09	G protein-coupled receptor 155	GPR155	chr2q31.1
220416_at	5.16	6.444	1.284	1.54654e-06	3.01198e-06	ATPase, class I, type 8B, member 4	ATP8B4	chr15q21.2
223834_at	5.616	6.9	1.284	4.83192e-08	1.77828e-07	CD274 molecule	CD274	chr9p24
224800_at	8.494	9.777	1.283	3.42966e-08	1.33553e-07	WD repeat and FYVE domain containing 1	WDFY1	chr2q36.1
208012_x_at	10.057	11.337	1.28	1.13521e-14	1.08569e-12	SP110 nuclear body protein	SP110	chr2q37.1
209803_s_at	4.838	6.117	1.279	2.97434e-08	1.19054e-07	pleckstrin homology-like domain, family A, member 2	PHLDA2	chr11p15.4
232253_at	8.754	10.031	1.277	8.19077e-14	4.55436e-12	chromosome 5 open reading frame 56	C5orf56	chr5q31.1
1554508_at	5.295	6.56	1.265	9.72742e-10	7.23041e-09	phosphoinositide-3-kinase adaptor protein 1	PIK3AP1	chr10q24.1
215719_x_at	7.591	8.855	1.264	4.29063e-06	6.97081e-06	Fas cell surface death receptor	FAS	chr10q24.1
210985_s_at	5.028	6.283	1.255	1.48714e-06	2.92008e-06	SP100 nuclear antigen	SP100	chr2q37.1
229210_at	6.583	7.838	1.255	9.79386e-10	7.25723e-09	ribonuclease H2, subunit B	RNASEH2B	chr13q14.3
206491_s_at	9.136	10.388	1.252	4.95193e-12	1.02658e-10	N-ethylmaleimide-sensitive factor attachment protein, alpha	NAPA	chr19q13.33
237006_at	7.923	9.172	1.249	3.45766e-10	3.06947e-09	---	---	---
205061_s_at	7.673	8.921	1.248	1.23333e-11	2.07665e-10	exosome component 9	EXOSC9	chr4q27
222146_s_at	5.949	7.197	1.248	1.1588e-11	1.97703e-10	transcription factor 4	TCF4	chr18q21.1
222859_s_at	8.802	10.05	1.248	1.10462e-09	8.03578e-09	dual adaptor of phosphotyrosine and 3-phosphoinositides	DAPP1	chr4q25-q27
235306_at	8.957	10.202	1.245	5.90709e-12	1.18354e-10	GTPase, IMAP family member 8	GIMAP8	chr7q36.1
201999_s_at	10.98	12.224	1.244	5.79128e-13	1.97589e-11	dynein, light chain, Tctex-type 1	DYNLT1	chr6q25.2-q25.3
236065_at	5.686	6.93	1.244	3.64254e-05	4.17371e-05	---	---	---
205306_x_at	6.414	7.656	1.242	5.95109e-08	2.10071e-07	kynurenine 3-monooxygenase (kynurenine 3-hydroxylase)	KMO	chr1q42-q44
231166_at	7.762	9.003	1.241	8.84187e-11	1.0279e-09	G protein-coupled receptor 155	GPR155	chr2q31.1
205467_at	7.177	8.415	1.238	2.6142e-12	6.20905e-11	caspase 10	CASP10	chr2q33-q34
202864_s_at	8.873	10.11	1.237	7.84213e-12	1.46486e-10	SP100 nuclear antigen	SP100	chr2q37.1
218578_at	7.132	8.369	1.237	3.32915e-09	1.95734e-08	cell division cycle 73	CDC73	chr1q25
238508_at	4.83	6.064	1.234	4.39658e-12	9.38574e-11	DBF4 zinc finger B	DBF4B	chr17q21.31|17q21
1552701_a_at	9.302	10.533	1.231	1.14205e-06	2.33783e-06	caspase recruitment domain family, member 16	CARD16	chr11q22
1563357_at	6.046	7.276	1.23	6.43744e-12	1.25135e-10	tumor necrosis factor	TNF	chr6p21.3
242390_at	6.976	8.206	1.23	2.0016e-11	3.01622e-10	---	---	---
207713_s_at	8.162	9.39	1.228	1.6005e-10	1.6638e-09	RanBP-type and C3HC4-type zinc finger containing 1	RBCK1	chr20p13
244015_at	6.659	7.886	1.227	1.25632e-09	8.93986e-09	---	---	---
1556453_at	5.392	6.618	1.226	5.94238e-14	3.46536e-12	uncharacterized LOC100506274	LOC100506274	chr2p25
222952_s_at	6.508	7.734	1.226	9.69458e-12	1.71699e-10	toll-like receptor 7	TLR7	chrXp22.3
231455_at	3.683	4.908	1.225	5.11024e-06	8.04898e-06	long intergenic non-protein coding RNA 487	LINC00487	chr2p25.2
233880_at	6.922	8.147	1.225	3.22745e-11	4.51268e-10	ring finger protein 213	RNF213	chr17q25.3
225335_at	6.029	7.251	1.222	1.85845e-15	3.02964e-13	zinc finger protein 496	ZNF496	chr1q44
230788_at	6.115	7.337	1.222	7.34575e-08	2.4889e-07	glucosaminyl (N-acetyl) transferase 2, I-branching enzyme (I blood group)	GCNT2	chr6p24.2
204858_s_at	8.931	10.152	1.221	6.27678e-11	7.72255e-10	thymidine phosphorylase	TYMP	chr22q13.33
237426_at	7.581	8.802	1.221	3.88732e-09	2.21824e-08	SP100 nuclear antigen	SP100	chr2q37.1
214995_s_at	7.267	8.485	1.218	7.17974e-07	1.59589e-06	apolipoprotein B mRNA editing enzyme, catalytic polypeptide-like 3F /// apolipoprotein B mRNA editing enzyme, catalytic polypeptide-like 3G	APOBEC3F /// APOBEC3G	chr22q13.1 /// chr22q13.1-q13.2
243149_at	6.361	7.578	1.217	2.06806e-08	8.71558e-08	---	---	---
211729_x_at	9.683	10.898	1.215	3.35195e-13	1.294e-11	biliverdin reductase A	BLVRA	chr7p13
217027_x_at	7.366	8.581	1.215	6.27122e-09	3.27146e-08	---	---	---
223952_x_at	8.53	9.745	1.215	1.09405e-07	3.42833e-07	dehydrogenase/reductase (SDR family) member 9	DHRS9	chr2q31.1
222858_s_at	9.444	10.657	1.213	7.61256e-09	3.83723e-08	dual adaptor of phosphotyrosine and 3-phosphoinositides	DAPP1	chr4q25-q27
224009_x_at	8.578	9.791	1.213	1.39966e-07	4.20418e-07	dehydrogenase/reductase (SDR family) member 9	DHRS9	chr2q31.1
238743_at	4.462	5.675	1.213	3.15466e-10	2.85334e-09	---	---	---
217508_s_at	5.43	6.64	1.21	2.46523e-10	2.34519e-09	chromosome 18 open reading frame 25	C18orf25	chr18q21.1
203773_x_at	9.691	10.9	1.209	8.67044e-13	2.63525e-11	biliverdin reductase A	BLVRA	chr7p13
208917_x_at	7.609	8.818	1.209	1.11495e-08	5.23389e-08	NAD kinase	NADK	chr1p36.33
210163_at	3.266	4.475	1.209	9.19382e-05	9.096e-05	chemokine (C-X-C motif) ligand 11	CXCL11	chr4q21.2
227856_at	6.615	7.824	1.209	2.11587e-06	3.90754e-06	chromosome 4 open reading frame 32	C4orf32	chr4q25
218974_at	4.796	6.003	1.207	1.54043e-10	1.6249e-09	sine oculis binding protein homolog	SOBP	chr6q21
226345_at	7.685	8.892	1.207	7.27608e-08	2.46763e-07	ADP-ribosylation factor like GTPase 5B	ARL5B	chr10p12.31
33736_at	6.094	7.3	1.206	1.21466e-12	3.31278e-11	stomatin (EPB72)-like 1	STOML1	chr15q24.1
213469_at	3.439	4.644	1.205	7.94167e-08	2.65198e-07	post-GPI attachment to proteins 1	PGAP1	chr2q33.1
205841_at	6.28	7.482	1.202	4.80474e-06	7.64502e-06	Janus kinase 2	JAK2	chr9p24
214084_x_at	11.169	12.371	1.202	1.61503e-10	1.67302e-09	neutrophil cytosolic factor 1	NCF1	chr7q11.23
1556728_at	5.328	6.526	1.198	1.25478e-07	3.83811e-07	---	---	---
217299_s_at	5.777	6.973	1.196	4.32255e-08	1.61991e-07	nibrin	NBN	chr8q21
239988_at	4.705	5.899	1.194	1.01409e-09	7.46043e-09	uncharacterized LOC102723458	LOC102723458	---
226193_x_at	8.314	9.507	1.193	2.10085e-09	1.33591e-08	COBW domain containing 1 /// COBW domain containing 2 /// COBW domain containing 3 /// COBW domain containing 5 /// COBW domain containing 6	CBWD1 /// CBWD2 /// CBWD3 /// CBWD5 /// CBWD6	chr2q13 /// chr9p24.3 /// chr9q13 /// chr9q21.11
211776_s_at	5.898	7.09	1.192	4.29678e-08	1.61278e-07	erythrocyte membrane protein band 4.1-like 3	EPB41L3	chr18p11.32
238654_at	4.619	5.811	1.192	7.92951e-11	9.41677e-10	V-set and immunoglobulin domain containing 10 like	VSIG10L	chr19q13.41
219868_s_at	6.189	7.38	1.191	3.92209e-12	8.57702e-11	ankyrin repeat and FYVE domain containing 1	ANKFY1	chr17p13.3
204668_at	7.73	8.92	1.19	2.30417e-08	9.55898e-08	ring finger protein 24	RNF24	chr20p13
208936_x_at	7.929	9.118	1.189	9.81795e-12	1.73029e-10	lectin, galactoside-binding, soluble, 8	LGALS8	chr1q43
239606_at	5.734	6.922	1.188	3.77387e-09	2.16264e-08	---	---	---
211138_s_at	6.041	7.228	1.187	3.96235e-08	1.50697e-07	kynurenine 3-monooxygenase (kynurenine 3-hydroxylase)	KMO	chr1q42-q44
201060_x_at	9.487	10.673	1.186	1.48674e-09	1.01855e-08	stomatin	STOM	chr9q34.1
208966_x_at	11.092	12.278	1.186	1.22315e-12	3.3233e-11	interferon, gamma-inducible protein 16	IFI16	chr1q22
214708_at	5.297	6.483	1.186	1.78083e-09	1.17513e-08	syntrophin, beta 1 (dystrophin-associated protein A1, 59kDa, basic component 1)	SNTB1	chr8q23-q24
209761_s_at	10.377	11.562	1.185	1.08093e-11	1.87732e-10	SP110 nuclear body protein	SP110	chr2q37.1
1554116_s_at	5.578	6.761	1.183	4.40217e-10	3.76803e-09	poly(ADP-ribose) polymerase family member 11	PARP11	chr12p13.3
220175_s_at	7.207	8.39	1.183	3.81305e-08	1.45947e-07	COBW domain containing 1 /// COBW domain containing 2 /// COBW domain containing 3 /// COBW domain containing 4 pseudogene /// COBW domain containing 5 /// COBW domain containing 6 /// COBW domain containing 7	CBWD1 /// CBWD2 /// CBWD3 /// CBWD4P /// CBWD5 /// CBWD6 /// CBWD7	chr2q13 /// chr9p12 /// chr9p24.3 /// chr9q13 /// chr9q21.11
209616_s_at	7.247	8.429	1.182	1.10764e-07	3.46488e-07	carboxylesterase 1 /// carboxylesterase 1 pseudogene 1	CES1 /// CES1P1	chr16q12.2 /// chr16q22.2
215159_s_at	7.238	8.42	1.182	1.22439e-09	8.73866e-09	NAD kinase	NADK	chr1p36.33
222708_s_at	6.698	7.88	1.182	3.23619e-10	2.91252e-09	syntaxin 17	STX17	chr9q31.1
232645_at	8.142	9.324	1.182	3.7381e-12	8.3012e-11	uncharacterized LOC153684	LOC153684	chr5p12
204047_s_at	5.064	6.245	1.181	6.34429e-11	7.77666e-10	phosphatase and actin regulator 2	PHACTR2	chr6q24.2
204961_s_at	11.373	12.549	1.176	1.0115e-10	1.14257e-09	neutrophil cytosolic factor 1 /// neutrophil cytosolic factor 1B pseudogene /// neutrophil cytosolic factor 1C pseudogene	NCF1 /// NCF1B /// NCF1C	chr7q11.23
206247_at	8.901	10.077	1.176	1.27306e-13	6.29758e-12	MHC class I polypeptide-related sequence B	MICB	chr6p21.3
204043_at	7.035	8.209	1.174	2.67902e-10	2.48915e-09	transcobalamin II	TCN2	chr22q12.2
204190_at	7.463	8.637	1.174	1.53963e-13	7.26552e-12	ubiquitin specific peptidase like 1	USPL1	chr13q12.3
38269_at	9.249	10.422	1.173	7.88662e-13	2.44719e-11	protein kinase D2	PRKD2	chr19q13.3
214706_at	6.565	7.735	1.17	2.61735e-08	1.06428e-07	zinc finger protein 200	ZNF200	chr16p13.3
200042_at	8.618	9.784	1.166	6.89698e-12	1.31719e-10	RNA 2',3'-cyclic phosphate and 5'-OH ligase	RTCB	chr22q12
226939_at	7.363	8.526	1.163	1.34392e-05	1.80183e-05	cytoplasmic polyadenylation element binding protein 2	CPEB2	chr4p15.33
212387_at	6.626	7.787	1.161	1.37398e-09	9.5963e-09	transcription factor 4	TCF4	chr18q21.1
226101_at	6.495	7.654	1.159	1.63769e-11	2.56482e-10	protein kinase C, epsilon	PRKCE	chr2p21
226310_at	7.267	8.425	1.158	1.28903e-06	2.58992e-06	RPTOR independent companion of MTOR, complex 2	RICTOR	chr5p13.1
226662_at	6.318	7.476	1.158	7.23337e-13	2.33712e-11	syntaxin 17	STX17	chr9q31.1
206332_s_at	10.649	11.8	1.151	1.39372e-11	2.27722e-10	interferon, gamma-inducible protein 16	IFI16	chr1q22
1552485_at	5.277	6.427	1.15	1.03187e-06	2.15221e-06	lactamase, beta	LACTB	chr15q22.1
213607_x_at	9.045	10.194	1.149	2.23283e-09	1.39998e-08	NAD kinase	NADK	chr1p36.33
1560128_x_at	8.621	9.768	1.147	2.88223e-13	1.1422e-11	chromosome 5 open reading frame 56	C5orf56	chr5q31.1
201936_s_at	6.157	7.304	1.147	8.61989e-09	4.24069e-08	eukaryotic translation initiation factor 4 gamma, 3	EIF4G3	chr1p36.12
219014_at	11.344	12.49	1.146	2.07308e-10	2.03141e-09	placenta specific 8	PLAC8	chr4q21.22
210421_s_at	4.998	6.138	1.14	9.34069e-08	3.03853e-07	solute carrier family 24 (sodium/potassium/calcium exchanger), member 1	SLC24A1	chr15q22
242277_at	3.988	5.128	1.14	7.15523e-10	5.603e-09	---	---	---
1554447_at	5.297	6.436	1.139	1.84319e-06	3.47827e-06	JPX transcript, XIST activator (non-protein coding)	JPX	chrXq13.2
215641_at	4.271	5.41	1.139	8.86214e-10	6.69125e-09	SEC24 homolog D, COPII coat complex component	SEC24D	chr4q26
1559051_s_at	5.204	6.342	1.138	2.90143e-12	6.71341e-11	Mab-21 domain containing 1	MB21D1	chr6q13
226748_at	10.543	11.68	1.137	6.82667e-15	7.62358e-13	LysM, putative peptidoglycan-binding, domain containing 2	LYSMD2	chr15q21.2
232035_at	6.183	7.32	1.137	3.2291e-06	5.51867e-06	histone cluster 1, H4h	HIST1H4H	chr6p22.1
223980_s_at	9.953	11.086	1.133	2.85862e-10	2.62572e-09	SP110 nuclear body protein	SP110	chr2q37.1
243038_at	4.772	5.904	1.132	1.72649e-09	1.1456e-08	RNA binding motif protein 43	RBM43	chr2q23.3
239167_at	7.049	8.18	1.131	1.797e-09	1.1822e-08	uncharacterized LOC105377320	LOC105377320	---
205099_s_at	8.948	10.078	1.13	4.11149e-11	5.50208e-10	chemokine (C-C motif) receptor 1	CCR1	chr3p21
225095_at	8.334	9.463	1.129	2.9711e-08	1.18991e-07	serine palmitoyltransferase, long chain base subunit 2	SPTLC2	chr14q24.3
218559_s_at	9.947	11.075	1.128	5.16777e-10	4.26065e-09	v-maf avian musculoaponeurotic fibrosarcoma oncogene homolog B	MAFB	chr20q12
236459_at	4.531	5.657	1.126	2.38728e-08	9.85815e-08	protein kinase C, epsilon	PRKCE	chr2p21
235292_at	6.738	7.862	1.124	1.59872e-11	2.52216e-10	uncharacterized LOC643977	FLJ32255	chr5p12
236106_at	5.043	6.166	1.123	1.47465e-11	2.38231e-10	---	---	---
AFFX-HUMISGF3A/M97935_3_at	9.92	11.042	1.122	8.34665e-11	9.78258e-10	signal transducer and activator of transcription 1	STAT1	chr2q32.2
239661_at	5.305	6.426	1.121	1.68256e-08	7.39057e-08	---	---	---
205899_at	4.035	5.155	1.12	4.0419e-08	1.53235e-07	cyclin A1	CCNA1	chr13q12.3-q13
232232_s_at	5.438	6.556	1.118	1.50024e-10	1.59659e-09	solute carrier family 22 (organic cation/carnitine transporter), member 16	SLC22A16	chr6q22.1|6q21-q22.1
223192_at	8.568	9.685	1.117	5.77943e-12	1.16775e-10	solute carrier family 25 (mitochondrial iron transporter), member 28	SLC25A28	chr10q24.2
223846_at	6.312	7.428	1.116	3.42121e-09	1.99836e-08	5-azacytidine induced 2	AZI2	chr3p24.1
218776_s_at	6.663	7.777	1.114	4.65276e-13	1.71147e-11	transmembrane protein 62	TMEM62	chr15q15.2
214684_at	6.605	7.717	1.112	3.46635e-05	4.00317e-05	myocyte enhancer factor 2A	MEF2A	chr15q26
209893_s_at	6.282	7.392	1.11	1.82883e-10	1.83468e-09	fucosyltransferase 4 (alpha (1,3) fucosyltransferase, myeloid-specific)	FUT4	chr11q21
210839_s_at	4.751	5.861	1.11	1.17905e-07	3.64689e-07	ectonucleotide pyrophosphatase/phosphodiesterase 2	ENPP2	chr8q24.1
216950_s_at	9.257	10.366	1.109	9.73522e-06	1.37514e-05	Fc fragment of IgG, high affinity Ia, receptor (CD64) /// Fc fragment of IgG, high affinity Ic, receptor (CD64), pseudogene	FCGR1A /// FCGR1C	chr1q21.2 /// chr1q21.2-q21.3
243754_at	5.511	6.618	1.107	3.31445e-10	2.96805e-09	uncharacterized LOC105373098	LOC105373098	---
202307_s_at	10.295	11.4	1.105	8.62559e-12	1.57832e-10	transporter 1, ATP-binding cassette, sub-family B (MDR/TAP)	TAP1	chr6p21.3
218292_s_at	6.125	7.23	1.105	2.41691e-12	5.83627e-11	protein kinase, AMP-activated, gamma 2 non-catalytic subunit	PRKAG2	chr7q36.1
233748_x_at	6.456	7.561	1.105	9.63659e-12	1.71519e-10	protein kinase, AMP-activated, gamma 2 non-catalytic subunit	PRKAG2	chr7q36.1
1553809_a_at	4.874	5.977	1.103	9.55285e-08	3.09491e-07	transmembrane protein 252	TMEM252	chr9q21.11
206932_at	4.174	5.276	1.102	7.34166e-06	1.08961e-05	cholesterol 25-hydroxylase	CH25H	chr10q23
209211_at	4.429	5.53	1.101	1.98993e-08	8.45086e-08	Kruppel-like factor 5 (intestinal)	KLF5	chr13q22.1
213629_x_at	8.685	9.786	1.101	7.67582e-15	8.34206e-13	metallothionein 1F	MT1F	chr16q13
202988_s_at	3.778	4.878	1.1	6.64871e-07	1.49566e-06	regulator of G-protein signaling 1	RGS1	chr1q31
206710_s_at	6.836	7.936	1.1	2.97982e-09	1.78562e-08	erythrocyte membrane protein band 4.1-like 3	EPB41L3	chr18p11.32
211367_s_at	8.898	9.998	1.1	6.37507e-08	2.22147e-07	caspase 1	CASP1	chr11q23
222881_at	7.429	8.529	1.1	3.69721e-09	2.12667e-08	heparanase	HPSE	chr4q21.3
233006_at	5.433	6.533	1.1	4.13471e-12	8.90622e-11	septin 4	2019-09-04	chr17q22
206703_at	5.231	6.33	1.099	5.13023e-12	1.0544e-10	cholinergic receptor, nicotinic beta 1	CHRNB1	chr17p13.1
221827_at	10.084	11.183	1.099	2.7454e-14	1.8975e-12	RanBP-type and C3HC4-type zinc finger containing 1	RBCK1	chr20p13
219202_at	7.716	8.812	1.096	5.07064e-12	1.04816e-10	rhomboid 5 homolog 2 (Drosophila)	RHBDF2	chr17q25.1
202286_s_at	4.843	5.937	1.094	1.07175e-07	3.37913e-07	tumor-associated calcium signal transducer 2	TACSTD2	chr1p32
219357_at	8.308	9.402	1.094	5.86662e-10	4.75485e-09	GTP binding protein 1	GTPBP1	chr22q13.1
210873_x_at	9.453	10.546	1.093	6.40169e-08	2.22689e-07	apolipoprotein B mRNA editing enzyme, catalytic polypeptide-like 3A /// APOBEC3A and APOBEC3B deletion hybrid	APOBEC3A /// APOBEC3A_B	chr22q13 alternate reference locus /// chr22q13.1-q13.2
218280_x_at	9.903	10.996	1.093	8.83084e-08	2.90488e-07	histone cluster 2, H2aa3 /// histone cluster 2, H2aa4	HIST2H2AA3 /// HIST2H2AA4	chr1q21.2
229315_at	4.847	5.94	1.093	2.17794e-07	6.02471e-07	---	---	---
202087_s_at	7.582	8.674	1.092	9.98891e-09	4.76707e-08	cathepsin L	CTSL	chr9q21.33
209305_s_at	7.892	8.979	1.087	1.85932e-11	2.84364e-10	growth arrest and DNA-damage-inducible, beta	GADD45B	chr19p13.3
202906_s_at	8.157	9.243	1.086	3.61192e-09	2.08689e-08	nibrin	NBN	chr8q21
241501_at	6.703	7.789	1.086	1.01714e-11	1.77947e-10	---	---	---
1553613_s_at	4.11	5.195	1.085	1.99264e-08	8.45736e-08	forkhead box C1	FOXC1	chr6p25
227040_at	6.423	7.508	1.085	9.32955e-06	1.32635e-05	NHL repeat containing 3	NHLRC3	chr13q13.3
228349_at	6.1	7.184	1.084	1.01682e-13	5.43769e-12	KIAA1958	KIAA1958	chr9q32
1556472_s_at	5.739	6.822	1.083	5.84286e-06	9.00904e-06	sex comb on midleg-like 4 (Drosophila)	SCML4	chr6q21
200887_s_at	10.639	11.722	1.083	5.17771e-11	6.55009e-10	signal transducer and activator of transcription 1	STAT1	chr2q32.2
232787_at	6.907	7.989	1.082	3.92724e-10	3.44716e-09	helicase with zinc finger 2, transcriptional coactivator	HELZ2	chr20q13.33
207375_s_at	7.013	8.094	1.081	1.62337e-11	2.54796e-10	interleukin 15 receptor, alpha	IL15RA	chr10p15.1
223830_s_at	3.966	5.047	1.081	1.07828e-06	2.23293e-06	tripartite motif containing 5	TRIM5	chr11p15
210458_s_at	5.858	6.936	1.078	2.0518e-06	3.80291e-06	TRAF family member-associated NFKB activator	TANK	chr2q24.2
226105_at	6.306	7.384	1.078	4.89774e-09	2.66749e-08	core 1 synthase, glycoprotein-N-acetylgalactosamine 3-beta-galactosyltransferase 1	C1GALT1	chr7p21.3
226438_at	7.19	8.268	1.078	5.81026e-09	3.06433e-08	syntrophin, beta 1 (dystrophin-associated protein A1, 59kDa, basic component 1)	SNTB1	chr8q23-q24
1563720_at	5.315	6.391	1.076	1.77617e-05	2.27139e-05	G protein-coupled receptor 141	GPR141	chr7p14.1
230510_at	5.137	6.213	1.076	2.5415e-11	3.67537e-10	heat shock protein, alpha-crystallin-related, B9	HSPB9	chr17q21.2
206008_at	5.896	6.97	1.074	8.1751e-10	6.28498e-09	transglutaminase 1	TGM1	chr14q11.2
208975_s_at	8.774	9.847	1.073	2.90561e-06	5.06846e-06	karyopherin (importin) beta 1	KPNB1	chr17q21.32
211014_s_at	6.491	7.564	1.073	2.93999e-09	1.76766e-08	promyelocytic leukemia	PML	chr15q22
225056_at	7.527	8.6	1.073	3.26577e-05	3.80336e-05	signal-induced proliferation-associated 1 like 2	SIPA1L2	chr1q42.2
238025_at	9.417	10.49	1.073	1.77362e-10	1.79435e-09	mixed lineage kinase domain-like	MLKL	chr16q23.1
233156_at	4.277	5.349	1.072	4.75467e-09	2.60539e-08	ribonuclease H2, subunit B	RNASEH2B	chr13q14.3
1552703_s_at	9.333	10.403	1.07	1.78789e-07	5.12767e-07	caspase recruitment domain family, member 16 /// caspase 1	CARD16 /// CASP1	chr11q22 /// chr11q23
232150_at	8.595	9.665	1.07	1.10036e-08	5.17894e-08	---	---	---
232378_at	5.716	6.786	1.07	9.80692e-11	1.11303e-09	solute carrier family 5 (sodium/sugar cotransporter), member 9	SLC5A9	chr1p33
1568592_at	8.495	9.564	1.069	9.60505e-10	7.15428e-09	ring finger protein 4 pseudogene /// tripartite motif containing 69	LOC100419583 /// TRIM69	chr15q21.1
205513_at	7.997	9.065	1.068	1.39189e-05	1.8547e-05	transcobalamin I (vitamin B12 binding protein, R binder family)	TCN1	chr11q11-q12
202599_s_at	7.215	8.282	1.067	6.233e-06	9.49447e-06	nuclear receptor interacting protein 1	NRIP1	chr21q11.2
233421_s_at	5.718	6.783	1.065	3.21301e-07	8.31102e-07	nucleoporin 133kDa	NUP133	chr1q42.13
239817_at	4.418	5.482	1.064	1.15948e-07	3.60071e-07	---	---	---
1562785_at	5.232	6.295	1.063	1.25776e-07	3.84558e-07	uncharacterized LOC105369192	LOC105369192	---
235670_at	8.382	9.445	1.063	2.67263e-08	1.08246e-07	syntaxin 11	STX11	chr6q24.2
236965_at	4.636	5.699	1.063	2.13561e-09	1.35322e-08	olfactomedin family member 5, pseudogene /// ubiquilin-like	OLFM5P /// UBQLNL	chr11p15.4
242752_at	3.958	5.021	1.063	3.42184e-10	3.04899e-09	protein phosphatase, Mg2+/Mn2+ dependent, 1K	PPM1K	chr4q22.1
222670_s_at	9.351	10.412	1.061	1.05694e-11	1.84012e-10	v-maf avian musculoaponeurotic fibrosarcoma oncogene homolog B	MAFB	chr20q12
201924_at	9.927	10.984	1.057	4.98153e-10	4.13835e-09	AF4/FMR2 family, member 1	AFF1	chr4q21
204162_at	4.761	5.818	1.057	8.85191e-07	1.89589e-06	NDC80 kinetochore complex component	NDC80	chr18p11.32
202702_at	7.989	9.044	1.055	8.57443e-13	2.61716e-11	tripartite motif containing 26	TRIM26	chr6p21.3
214511_x_at	9.655	10.71	1.055	3.74509e-06	6.22983e-06	Fc fragment of IgG, high affinity Ib, receptor (CD64)	FCGR1B	chr1p11.2
221050_s_at	8.032	9.086	1.054	5.92527e-12	1.18388e-10	GTP binding protein 2	GTPBP2	chr6p21
204205_at	9.471	10.524	1.053	4.64103e-10	3.93958e-09	apolipoprotein B mRNA editing enzyme, catalytic polypeptide-like 3G	APOBEC3G	chr22q13.1-q13.2
226459_at	10.931	11.984	1.053	4.02683e-10	3.50959e-09	phosphoinositide-3-kinase adaptor protein 1	PIK3AP1	chr10q24.1
200881_s_at	9.778	10.829	1.051	3.61652e-09	2.08695e-08	DnaJ (Hsp40) homolog, subfamily A, member 1	DNAJA1	chr9p13.3
209920_at	6.315	7.366	1.051	5.70843e-13	1.95913e-11	bone morphogenetic protein receptor type II	BMPR2	chr2q33-q34
204804_at	8.908	9.958	1.05	9.82952e-11	1.11384e-09	tripartite motif containing 21	TRIM21	chr11p15.5
203397_s_at	8.204	9.253	1.049	1.95598e-06	3.65841e-06	polypeptide N-acetylgalactosaminyltransferase 3	GALNT3	chr2q24-q31
235235_s_at	5.748	6.797	1.049	5.91685e-14	3.46536e-12	protein associated with topoisomerase II homolog 1 (yeast)	PATL1	chr11q12.1
203964_at	10.413	11.46	1.047	2.33672e-11	3.41364e-10	N-myc (and STAT) interactor	NMI	chr2q23
212385_at	5.638	6.685	1.047	9.40465e-10	7.01959e-09	transcription factor 4	TCF4	chr18q21.1
218666_s_at	5.92	6.967	1.047	8.54468e-14	4.71058e-12	syntaxin 17	STX17	chr9q31.1
203568_s_at	9.585	10.63	1.045	6.88494e-13	2.24723e-11	tripartite motif containing 38	TRIM38	chr6p21.3
235234_at	5.854	6.899	1.045	3.1787e-13	1.23915e-11	protein associated with topoisomerase II homolog 1 (yeast)	PATL1	chr11q12.1
205992_s_at	6.945	7.989	1.044	1.36939e-06	2.72604e-06	interleukin 15	IL15	chr4q31
221073_s_at	7.533	8.577	1.044	7.10156e-13	2.30491e-11	nucleotide-binding oligomerization domain containing 1	NOD1	chr7p14.3
203217_s_at	8.117	9.159	1.042	2.83874e-10	2.61721e-09	ST3 beta-galactoside alpha-2,3-sialyltransferase 5	ST3GAL5	chr2p11.2
200606_at	4.401	5.442	1.041	1.91623e-07	5.4135e-07	desmoplakin	DSP	chr6p24
226725_at	7.67	8.711	1.041	1.45879e-06	2.87306e-06	schlafen family member 5	SLFN5	chr17q12
1561882_at	4.511	5.551	1.04	2.48177e-05	3.00903e-05	synaptotagmin-like 3	SYTL3	chr6q25.3
204780_s_at	8.715	9.755	1.04	5.54066e-06	8.62278e-06	Fas cell surface death receptor	FAS	chr10q24.1
219759_at	7.697	8.737	1.04	2.88561e-06	5.04093e-06	endoplasmic reticulum aminopeptidase 2	ERAP2	chr5q15
203029_s_at	7.057	8.095	1.038	1.0157e-06	2.12591e-06	protein tyrosine phosphatase, receptor type, N polypeptide 2	PTPRN2	chr7q36
202905_x_at	7.423	8.459	1.036	1.52749e-08	6.82646e-08	nibrin	NBN	chr8q21
212906_at	6.781	7.815	1.034	1.5469e-11	2.47666e-10	GRAM domain containing 1B	GRAMD1B	chr11q24.1
207181_s_at	6.682	7.713	1.031	6.70476e-08	2.31436e-07	caspase 7	CASP7	chr10q25
219799_s_at	8.252	9.281	1.029	1.17462e-07	3.63634e-07	dehydrogenase/reductase (SDR family) member 9	DHRS9	chr2q31.1
228735_s_at	4.504	5.533	1.029	3.12308e-06	5.36714e-06	pantothenate kinase 2	PANK2	chr20p13
212420_at	10.083	11.11	1.027	2.30418e-10	2.21549e-09	E74-like factor 1 (ets domain transcription factor)	ELF1	chr13q13
212681_at	5.931	6.957	1.026	3.47748e-07	8.8452e-07	erythrocyte membrane protein band 4.1-like 3	EPB41L3	chr18p11.32
232405_at	6.248	7.274	1.026	6.20201e-10	4.98166e-09	---	---	---
226188_at	8.268	9.293	1.025	7.47462e-09	3.77938e-08	lectin, galactoside-binding-like	LGALSL	chr2p14
239411_at	6.153	7.178	1.025	1.58495e-13	7.38221e-12	---	---	---
201662_s_at	7.018	8.042	1.024	6.88105e-09	3.52297e-08	acyl-CoA synthetase long-chain family member 3	ACSL3	chr2q34-q35
219235_s_at	6.769	7.789	1.02	3.18302e-08	1.25723e-07	phosphatase and actin regulator 4	PHACTR4	chr1p35.3
229720_at	6.714	7.729	1.015	1.31716e-12	3.52531e-11	BCL2-associated athanogene	BAG1	chr9p12
1557242_at	5.749	6.763	1.014	1.00811e-09	7.42403e-09	---	---	---
205585_at	6.404	7.418	1.014	2.91816e-08	1.17198e-07	ets variant 6	ETV6	chr12p13
210214_s_at	5.609	6.622	1.013	8.75811e-10	6.64067e-09	bone morphogenetic protein receptor type II	BMPR2	chr2q33-q34
242727_at	3.499	4.512	1.013	2.67122e-06	4.72402e-06	ADP-ribosylation factor like GTPase 5B	ARL5B	chr10p12.31
205098_at	10.743	11.755	1.012	1.21106e-12	3.31278e-11	chemokine (C-C motif) receptor 1	CCR1	chr3p21
215245_x_at	8.373	9.382	1.009	3.07811e-06	5.31253e-06	fragile X mental retardation 1	FMR1	chrXq27.3
1563071_at	6.896	7.904	1.008	1.20345e-08	5.61261e-08	uncharacterized LOC100289061	LOC100289061	chr1q21.3
203689_s_at	8.438	9.445	1.007	1.03186e-07	3.28076e-07	fragile X mental retardation 1	FMR1	chrXq27.3
210046_s_at	8.637	9.644	1.007	1.60293e-10	1.66391e-09	isocitrate dehydrogenase 2 (NADP+), mitochondrial	IDH2	chr15q26.1
239725_at	4.102	5.107	1.005	1.00999e-07	3.22983e-07	post-GPI attachment to proteins 1	PGAP1	chr2q33.1
218284_at	7.445	8.449	1.004	5.85712e-12	1.17682e-10	SMAD family member 3	SMAD3	chr15q22.33
238856_s_at	4.349	5.352	1.003	9.4704e-07	2.00561e-06	pantothenate kinase 2	PANK2	chr20p13
207982_at	5.811	6.813	1.002	3.68293e-06	6.14639e-06	histone cluster 1, H1t	HIST1H1T	chr6p21.3
230425_at	5.805	6.807	1.002	3.34197e-07	8.58886e-07	EPH receptor B1	EPHB1	chr3q21-q23
239412_at	7.318	8.32	1.002	4.1667e-09	2.35147e-08	interferon regulatory factor 5	IRF5	chr7q32
213051_at	10.438	11.439	1.001	4.48265e-11	5.85673e-10	zinc finger CCCH-type, antiviral 1	ZC3HAV1	chr7q34
236285_at	6.149	7.15	1.001	5.0067e-07	1.1825e-06	kelch domain containing 7B	KLHDC7B	chr22q13.33
203574_at	10.142	11.142	1	4.95742e-09	2.69386e-08	nuclear factor, interleukin 3 regulated	NFIL3	chr9q22
1552486_s_at	6.156	7.155	0.999	2.37987e-06	4.29662e-06	lactamase, beta	LACTB	chr15q22.1
207338_s_at	7.773	8.771	0.998	1.02693e-07	3.2738e-07	zinc finger protein 200	ZNF200	chr16p13.3
207574_s_at	9.019	10.015	0.996	1.50961e-11	2.43331e-10	growth arrest and DNA-damage-inducible, beta	GADD45B	chr19p13.3
212467_at	7.521	8.516	0.995	6.37837e-11	7.79406e-10	DnaJ (Hsp40) homolog, subfamily C, member 13	DNAJC13	chr3q22.1
201761_at	8.565	9.558	0.993	7.78585e-06	1.14393e-05	methylenetetrahydrofolate dehydrogenase (NADP+ dependent) 2, methenyltetrahydrofolate cyclohydrolase	MTHFD2	chr2p13.1
209892_at	5.915	6.908	0.993	7.42027e-07	1.6402e-06	fucosyltransferase 4 (alpha (1,3) fucosyltransferase, myeloid-specific)	FUT4	chr11q21
230966_at	5.697	6.689	0.992	6.79071e-12	1.30587e-10	interleukin 4 induced 1	IL4I1	chr19q13.3-q13.4
221653_x_at	8.864	9.855	0.991	3.18076e-11	4.47355e-10	apolipoprotein L, 2	APOL2	chr22q12
223488_s_at	6.53	7.52	0.99	2.88085e-12	6.68736e-11	guanine nucleotide binding protein (G protein), beta polypeptide 4	GNB4	chr3q26.33
202708_s_at	8.96	9.948	0.988	3.17454e-06	5.44229e-06	histone cluster 2, H2be	HIST2H2BE	chr1q21.2
242995_at	6.323	7.309	0.986	9.37107e-09	4.53253e-08	---	---	---
205126_at	7.74	8.724	0.984	2.18131e-07	6.0317e-07	vaccinia related kinase 2	VRK2	chr2p16.1
205687_at	5.84	6.822	0.982	1.89074e-11	2.87793e-10	ubiquitin family domain containing 1	UBFD1	chr16p12
221643_s_at	6.13	7.112	0.982	5.62046e-08	2.00591e-07	arginine-glutamic acid dipeptide (RE) repeats	RERE	chr1p36.23
202600_s_at	4.43	5.411	0.981	1.37748e-05	1.83926e-05	nuclear receptor interacting protein 1	NRIP1	chr21q11.2
243824_at	7.309	8.29	0.981	5.2786e-05	5.67912e-05	long intergenic non-protein coding RNA 1410 /// uncharacterized LOC105379818	LINC01410 /// LOC105379818	chr9q13
203819_s_at	5.679	6.659	0.98	1.16825e-07	3.6245e-07	insulin-like growth factor 2 mRNA binding protein 3	IGF2BP3	chr7p11
228091_at	6.218	7.198	0.98	4.64014e-09	2.56419e-08	syntaxin 17	STX17	chr9q31.1
1558691_a_at	3.532	4.51	0.978	7.88015e-07	1.72391e-06	dedicator of cytokinesis 4	DOCK4	chr7q31.1
204999_s_at	5.227	6.205	0.978	3.45521e-08	1.34329e-07	activating transcription factor 5	ATF5	chr19q13.3
237703_at	5.854	6.83	0.976	6.17764e-09	3.23441e-08	---	---	---
220998_s_at	7.64	8.615	0.975	1.58574e-10	1.65442e-09	unc-93 homolog B1 (C. elegans)	UNC93B1	chr11q13
225634_at	9.65	10.625	0.975	1.13392e-10	1.25009e-09	zinc finger CCCH-type, antiviral 1	ZC3HAV1	chr7q34
225897_at	8.249	9.224	0.975	2.85849e-05	3.38822e-05	myristoylated alanine-rich protein kinase C substrate	MARCKS	chr6q22.2
200796_s_at	5.74	6.714	0.974	2.67995e-06	4.73354e-06	myeloid cell leukemia 1	MCL1	chr1q21
203806_s_at	6.441	7.414	0.973	1.07347e-12	3.05511e-11	Fanconi anemia complementation group A	FANCA	chr16q24.3
218842_at	7.089	8.06	0.971	8.3573e-08	2.76758e-07	RNA polymerase II associated protein 3	RPAP3	chr12q13.11
231049_at	4.649	5.619	0.97	1.48028e-09	1.01704e-08	LIM domain only 2 (rhombotin-like 1)	LMO2	chr11p13
200732_s_at	8.505	9.474	0.969	3.1585e-10	2.85334e-09	protein tyrosine phosphatase type IVA, member 1	PTP4A1	chr6q12
227014_at	7.243	8.212	0.969	1.49646e-09	1.02423e-08	aspartate beta-hydroxylase domain containing 2	ASPHD2	chr22q12.1
1553271_at	4.709	5.677	0.968	1.42333e-05	1.89027e-05	disco-interacting protein 2 homolog B	DIP2B	chr12q13.12
1558747_at	7.412	8.376	0.964	1.75583e-05	2.25e-05	structural maintenance of chromosomes flexible hinge domain containing 1	SMCHD1	chr18p11.32
223097_at	8.684	9.648	0.964	5.46114e-14	3.26211e-12	ADP-ribosylhydrolase like 2	ADPRHL2	chr1p34.3
220160_s_at	6.158	7.121	0.963	2.81973e-11	4.02099e-10	kaptin (actin binding protein)	KPTN	chr19q13.32
202113_s_at	8.845	9.808	0.963	6.68997e-08	2.31148e-07	sorting nexin 2	SNX2	chr5q23
203986_at	5.611	6.57	0.959	9.11591e-09	4.43002e-08	FAM47E-STBD1 readthrough /// starch binding domain 1	FAM47E-STBD1 /// STBD1	chr4q /// chr4q21.1
234609_at	5.273	6.232	0.959	3.62176e-08	1.39895e-07	---	---	---
213069_at	7.161	8.12	0.959	3.81834e-06	6.32648e-06	heart development protein with EGF-like domains 1	HEG1	chr3q21.2
217986_s_at	9.304	10.262	0.958	8.62279e-08	2.84892e-07	bromodomain adjacent to zinc finger domain 1A	BAZ1A	chr14q13.2
217995_at	10.431	11.389	0.958	4.87341e-11	6.21002e-10	sulfide quinone reductase-like (yeast)	SQRDL	chr15q15
1557544_at	4.552	5.508	0.956	4.48541e-08	1.67277e-07	cilia and flagella associated protein 58	CFAP58	chr10q25.1
1564525_at	5.629	6.585	0.956	3.17429e-09	1.88016e-08	gelsolin	GSN	chr9q33
211588_s_at	5.217	6.173	0.956	4.77373e-08	1.76139e-07	promyelocytic leukemia	PML	chr15q22
239669_at	5	5.954	0.954	0.000332068	0.000266886	---	---	---
232024_at	9.347	10.3	0.953	1.43393e-07	4.28379e-07	GTPase, IMAP family member 2	GIMAP2	chr7q36.1
229915_at	4.59	5.543	0.953	6.82994e-10	5.38946e-09	family with sequence similarity 26, member F	FAM26F	chr6q22.1
229059_at	5.4	6.353	0.953	7.70886e-12	1.4475e-10	family with sequence similarity 225, member A (non-protein coding) /// family with sequence similarity 225, member B (non-protein coding)	FAM225A /// FAM225B	chr9q32
1552329_at	5.251	6.202	0.951	3.58637e-07	9.06781e-07	retinoblastoma binding protein 6	RBBP6	chr16p12.2
204285_s_at	6.903	7.853	0.95	0.000119795	0.00011345	phorbol-12-myristate-13-acetate-induced protein 1	PMAIP1	chr18q21.32
214255_at	6.837	7.787	0.95	5.4223e-08	1.96134e-07	ATPase, class V, type 10A	ATP10A	chr15q11.2
214290_s_at	11.441	12.39	0.949	2.76815e-07	7.34077e-07	histone cluster 2, H2aa3 /// histone cluster 2, H2aa4	HIST2H2AA3 /// HIST2H2AA4	chr1q21.2
244034_at	5.16	6.109	0.949	7.76912e-09	3.89154e-08	---	---	---
52731_at	6.054	7.003	0.949	8.00877e-10	6.18362e-09	autophagy/beclin-1 regulator 1	AMBRA1	chr11p11.2
202357_s_at	4.52	5.468	0.948	1.6528e-06	3.1741e-06	complement factor B	CFB	chr6p21.3
204286_s_at	5.323	6.271	0.948	0.000237924	0.00020184	phorbol-12-myristate-13-acetate-induced protein 1	PMAIP1	chr18q21.32
205398_s_at	6.798	7.743	0.945	9.03692e-12	1.62866e-10	SMAD family member 3	SMAD3	chr15q22.33
230834_at	4.681	5.625	0.944	3.94632e-09	2.24654e-08	---	---	---
236191_at	4.429	5.372	0.943	5.61013e-07	1.30018e-06	---	---	---
1552370_at	4.911	5.852	0.941	1.74077e-07	5.02468e-07	chromosome 4 open reading frame 33	C4orf33	chr4q28.2
230711_at	4.423	5.363	0.94	1.488e-08	6.68261e-08	---	---	---
243348_at	3.9	4.84	0.94	4.37386e-07	1.06134e-06	---	---	---
215040_at	6.87	7.808	0.938	7.03704e-10	5.52856e-09	ribonuclease H2, subunit B	RNASEH2B	chr13q14.3
203158_s_at	6.188	7.124	0.936	3.21257e-08	1.26473e-07	glutaminase	GLS	chr2q32-q34
222582_at	6.803	7.739	0.936	3.52966e-07	8.95888e-07	protein kinase, AMP-activated, gamma 2 non-catalytic subunit	PRKAG2	chr7q36.1
1561167_at	7.332	8.267	0.935	7.73385e-06	1.13933e-05	---	---	---
203281_s_at	8.273	9.207	0.934	4.8937e-09	2.66731e-08	ubiquitin-like modifier activating enzyme 7	UBA7	chr3p21
236595_at	5.922	6.856	0.934	1.79929e-07	5.15006e-07	uncharacterized LOC101928152	LOC101928152	---
207655_s_at	6.577	7.51	0.933	4.56321e-05	5.02707e-05	B-cell linker	BLNK	chr10q23.2-q23.33
1561880_a_at	5.517	6.448	0.931	9.66179e-09	4.65119e-08	sialic acid binding Ig-like lectin 16 (gene/pseudogene)	SIGLEC16	chr19q13.33
233587_s_at	7.46	8.391	0.931	0.000197305	0.000172506	signal-induced proliferation-associated 1 like 2	SIPA1L2	chr1q42.2
209723_at	9.689	10.62	0.931	1.64205e-11	2.56606e-10	serpin peptidase inhibitor, clade B (ovalbumin), member 9	SERPINB9	chr6p25
238505_at	5.595	6.525	0.93	1.2008e-13	6.02321e-12	ADP-ribosylarginine hydrolase	ADPRH	chr3q13.31-q13.33
208935_s_at	7.513	8.443	0.93	2.05773e-11	3.06857e-10	lectin, galactoside-binding, soluble, 8	LGALS8	chr1q43
203128_at	8.144	9.073	0.929	6.18288e-08	2.16653e-07	serine palmitoyltransferase, long chain base subunit 2	SPTLC2	chr14q24.3
209304_x_at	8.706	9.635	0.929	1.22683e-11	2.07544e-10	growth arrest and DNA-damage-inducible, beta	GADD45B	chr19p13.3
218248_at	9.232	10.16	0.928	9.79308e-10	7.25723e-09	family with sequence similarity 111, member A	FAM111A	chr11q12.1
222555_s_at	7.357	8.285	0.928	1.96608e-08	8.37438e-08	mitochondrial ribosomal protein L44	MRPL44	chr2q36.1
208974_x_at	10.249	11.177	0.928	8.09873e-10	6.23295e-09	karyopherin (importin) beta 1	KPNB1	chr17q21.32
231876_at	9.24	10.165	0.925	3.07024e-12	7.05848e-11	tripartite motif containing 56	TRIM56	chr7q22.1
213022_s_at	6.132	7.056	0.924	1.67879e-10	1.7178e-09	utrophin	UTRN	chr6q24
212285_s_at	6.474	7.398	0.924	1.0746e-10	1.20219e-09	agrin	AGRN	chr1p36.33
239785_at	5.238	6.162	0.924	2.25664e-07	6.20651e-07	DAZ interacting zinc finger protein 1-like	DZIP1L	chr3q22.3
227462_at	7.235	8.157	0.922	8.38607e-05	8.40466e-05	endoplasmic reticulum aminopeptidase 2	ERAP2	chr5q15
1554612_at	4.029	4.95	0.921	1.34867e-06	2.69167e-06	RUN domain and cysteine-rich domain containing, Beclin 1-interacting protein	RUBCN	chr3q29
1556656_at	5.212	6.132	0.92	1.54339e-09	1.05133e-08	---	---	---
200880_at	9.374	10.294	0.92	7.08002e-08	2.4159e-07	DnaJ (Hsp40) homolog, subfamily A, member 1	DNAJA1	chr9p13.3
214700_x_at	5.16	6.08	0.92	4.17578e-06	6.80779e-06	replication timing regulatory factor 1	RIF1	chr2q23.3
1555643_s_at	9.598	10.517	0.919	6.92306e-06	1.03822e-05	leukocyte immunoglobulin-like receptor, subfamily A (with TM domain), member 5	LILRA5	chr19q13.4
212658_at	7.257	8.175	0.918	2.9904e-08	1.19564e-07	lipoma HMGIC fusion partner-like 2	LHFPL2	chr5q14.1
220358_at	7.015	7.932	0.917	6.12777e-11	7.55217e-10	basic leucine zipper transcription factor, ATF-like 3	BATF3	chr1q32.3
209722_s_at	4.87	5.787	0.917	1.96669e-09	1.26632e-08	serpin peptidase inhibitor, clade B (ovalbumin), member 9	SERPINB9	chr6p25
227544_at	7.782	8.699	0.917	4.36311e-12	9.34209e-11	transmembrane protein 229B	TMEM229B	chr14q24.1
1552322_at	3.371	4.287	0.916	1.35995e-06	2.71039e-06	family with sequence similarity 122C	FAM122C	chrXq26.3
209035_at	5.858	6.773	0.915	5.81343e-07	1.33779e-06	midkine (neurite growth-promoting factor 2)	MDK	chr11p11.2
210224_at	7.026	7.94	0.914	3.13224e-10	2.84034e-09	major histocompatibility complex, class I-related	MR1	chr1q25.3
203991_s_at	5.743	6.657	0.914	0.000323448	0.000261296	lysine (K)-specific demethylase 6A	KDM6A	chrXp11.2
202912_at	10.14	11.053	0.913	7.24026e-07	1.60685e-06	adrenomedullin	ADM	chr11p15.4
203094_at	8.2	9.113	0.913	6.76307e-12	1.30405e-10	MAD2L1 binding protein	MAD2L1BP	chr6p21.1
206632_s_at	5.952	6.865	0.913	1.10882e-05	1.53481e-05	apolipoprotein B mRNA editing enzyme, catalytic polypeptide-like 3B	APOBEC3B	chr22q13.1-q13.2
229973_at	3.353	4.266	0.913	2.87508e-05	3.40531e-05	glutamate rich 3	ERICH3	chr1p31.1
236104_at	6.039	6.952	0.913	1.32768e-11	2.20192e-10	heterogeneous nuclear ribonucleoprotein L-like	HNRNPLL	chr2p22.1
203030_s_at	6.399	7.311	0.912	8.06813e-08	2.68421e-07	protein tyrosine phosphatase, receptor type, N polypeptide 2	PTPRN2	chr7q36
235291_s_at	7.349	8.261	0.912	3.09429e-12	7.09104e-11	uncharacterized LOC643977	FLJ32255	chr5p12
1562289_at	8.642	9.552	0.91	1.30737e-05	1.76042e-05	---	---	---
219243_at	10.381	11.291	0.91	2.2692e-12	5.63206e-11	GTPase, IMAP family member 4	GIMAP4	chr7q36.1
218738_s_at	8.837	9.746	0.909	5.0435e-06	7.96134e-06	ring finger protein 138, E3 ubiquitin protein ligase	RNF138	chr18q12.1
204781_s_at	7.8	8.709	0.909	3.50043e-06	5.89947e-06	Fas cell surface death receptor	FAS	chr10q24.1
208654_s_at	9.278	10.186	0.908	5.49663e-06	8.56541e-06	CD164 molecule, sialomucin	CD164	chr6q21
217985_s_at	9.038	9.946	0.908	1.84969e-09	1.20615e-08	bromodomain adjacent to zinc finger domain 1A	BAZ1A	chr14q13.2
205771_s_at	5.918	6.825	0.907	9.62963e-05	9.45286e-05	A kinase (PRKA) anchor protein 7	AKAP7	chr6q23
203396_at	9.734	10.64	0.906	3.19597e-06	5.47379e-06	proteasome subunit alpha 4	PSMA4	chr15q25.1
218435_at	8.053	8.958	0.905	4.82943e-06	7.67749e-06	DnaJ (Hsp40) homolog, subfamily C, member 15	DNAJC15	chr13q14.1
244379_at	5.945	6.85	0.905	4.75121e-08	1.75488e-07	anoctamin 7 pseudogene 1	ANO7P1	chr1p36.13
1554999_at	4.481	5.385	0.904	3.25912e-05	3.79623e-05	RasGEF domain family member 1B	RASGEF1B	chr4q21.21
225564_at	9.148	10.052	0.904	2.43034e-07	6.60138e-07	spermatogenesis associated 13	SPATA13	chr13q12.12
238091_at	3.859	4.763	0.904	1.90544e-08	8.1939e-08	uncharacterized LOC100506388	LOC100506388	---
213226_at	5.338	6.241	0.903	1.44825e-06	2.85702e-06	cyclin A2	CCNA2	chr4q27
218809_at	9.701	10.602	0.901	4.66555e-12	9.81389e-11	pantothenate kinase 2	PANK2	chr20p13
213716_s_at	9.938	10.838	0.9	4.28853e-09	2.41074e-08	secreted and transmembrane 1	SECTM1	chr17q25
229043_at	6.788	7.688	0.9	1.37213e-05	1.83324e-05	PAP associated domain containing 5	PAPD5	chr16q12.1
218231_at	10.911	11.81	0.899	2.19453e-13	9.01221e-12	N-acetylglucosamine kinase	NAGK	chr2p13.3
230480_at	4.892	5.791	0.899	9.68861e-09	4.66097e-08	piwi-like RNA-mediated gene silencing 4	PIWIL4	chr11q21
1559820_at	6.144	7.042	0.898	2.09759e-10	2.04983e-09	autophagy related 10	ATG10	chr5q14.1
200868_s_at	8.319	9.217	0.898	9.02119e-11	1.04536e-09	ring finger protein 114	RNF114	chr20q13.13
200983_x_at	8.337	9.235	0.898	2.49803e-05	3.02465e-05	CD59 molecule, complement regulatory protein	CD59	chr11p13
222538_s_at	7.022	7.918	0.896	1.98735e-07	5.58318e-07	adaptor protein, phosphotyrosine interaction, PH domain and leucine zipper containing 1	APPL1	chr3p14.3
208918_s_at	11.181	12.076	0.895	1.87052e-09	1.21862e-08	NAD kinase	NADK	chr1p36.33
241620_at	4.809	5.704	0.895	7.13224e-06	1.06447e-05	structural maintenance of chromosomes flexible hinge domain containing 1	SMCHD1	chr18p11.32
231747_at	7.899	8.793	0.894	2.06537e-07	5.75324e-07	cysteinyl leukotriene receptor 1	CYSLTR1	chrXq13.2-q21.1
1562255_at	5.359	6.252	0.893	4.81737e-05	5.26422e-05	synaptotagmin-like 3	SYTL3	chr6q25.3
224648_at	7.935	8.828	0.893	2.22106e-07	6.11569e-07	GC-rich promoter binding protein 1	GPBP1	chr5q11.2
225353_s_at	5.487	6.38	0.893	1.76437e-06	3.35247e-06	complement component 1, q subcomponent, C chain	C1QC	chr1p36.11
226401_at	7.027	7.918	0.891	2.35973e-10	2.2568e-09	poly(ADP-ribose) polymerase family member 10	PARP10	chr8q24.3
228742_at	5.873	6.761	0.888	1.46158e-09	1.00902e-08	uncharacterized LOC101927008 /// uncharacterized LOC101928092	LOC101927008 /// LOC101928092	---
207616_s_at	9.081	9.964	0.883	5.52271e-07	1.28366e-06	TRAF family member-associated NFKB activator	TANK	chr2q24.2
214472_at	7.537	8.42	0.883	0.00108734	0.000730957	histone cluster 1, H2ad /// histone cluster 1, H3d	HIST1H2AD /// HIST1H3D	chr6p21.3 /// chr6p22.1
1294_at	7.978	8.86	0.882	7.92319e-09	3.9549e-08	ubiquitin-like modifier activating enzyme 7	UBA7	chr3p21
211924_s_at	9.071	9.951	0.88	4.48668e-09	2.49282e-08	plasminogen activator, urokinase receptor	PLAUR	chr19q13
225349_at	5.271	6.15	0.879	4.47095e-11	5.85673e-10	zinc finger protein 496	ZNF496	chr1q44
204689_at	7.925	8.801	0.876	1.23295e-06	2.49896e-06	hematopoietically expressed homeobox	HHEX	chr10q23.33
217199_s_at	6.212	7.088	0.876	7.641e-09	3.84887e-08	signal transducer and activator of transcription 2	STAT2	chr12q13.3
232829_at	7.287	8.162	0.875	4.90291e-07	1.16412e-06	olfactory receptor, family 52, subfamily K, member 3 pseudogene	OR52K3P	chr11p15.4
204502_at	9.586	10.459	0.873	9.51248e-13	2.83119e-11	SAM domain and HD domain 1	SAMHD1	chr20pter-q12
221087_s_at	8.041	8.912	0.871	9.07474e-10	6.82305e-09	apolipoprotein L, 3	APOL3	chr22q13.1
1553212_at	6.125	6.995	0.87	2.20741e-07	6.08744e-07	keratin 78, type II	KRT78	chr12q13.13
201660_at	6.994	7.864	0.87	1.33232e-06	2.66495e-06	acyl-CoA synthetase long-chain family member 3	ACSL3	chr2q34-q35
203810_at	4.666	5.536	0.87	2.73009e-05	3.25887e-05	DnaJ (Hsp40) homolog, subfamily B, member 4	DNAJB4	chr1p31.1
219210_s_at	7.47	8.339	0.869	4.27988e-07	1.04135e-06	RAB8B, member RAS oncogene family	RAB8B	chr15q22.2
212577_at	9.374	10.242	0.868	9.82826e-09	4.70606e-08	structural maintenance of chromosomes flexible hinge domain containing 1	SMCHD1	chr18p11.32
235791_x_at	8.097	8.964	0.867	6.56642e-07	1.47881e-06	chromodomain helicase DNA binding protein 1	CHD1	chr5q15-q21
204998_s_at	6.739	7.605	0.866	3.02133e-09	1.80597e-08	activating transcription factor 5	ATF5	chr19q13.3
1555311_at	6.759	7.625	0.866	5.69187e-06	8.81603e-06	---	---	---
209276_s_at	9.329	10.195	0.866	4.13713e-07	1.0128e-06	glutaredoxin	GLRX	chr5q14
218397_at	5.713	6.579	0.866	0.000317304	0.000257056	Fanconi anemia complementation group L	FANCL	chr2p16.1
208278_s_at	5.938	6.803	0.865	5.47964e-08	1.97374e-07	---	---	---
1557699_x_at	4.247	5.111	0.864	0.00019245	0.000169045	uncharacterized LOC105379250	LOC105379250	---
225144_at	6.509	7.372	0.863	3.60478e-05	4.13705e-05	bone morphogenetic protein receptor type II	BMPR2	chr2q33-q34
229109_s_at	4.871	5.734	0.863	7.17698e-10	5.61391e-09	biliverdin reductase A	BLVRA	chr7p13
217752_s_at	9.384	10.246	0.862	1.25375e-10	1.36672e-09	CNDP dipeptidase 2 (metallopeptidase M20 family)	CNDP2	chr18q22.3
206011_at	10.373	11.233	0.86	7.661e-10	5.92258e-09	caspase 1	CASP1	chr11q23
209589_s_at	5.899	6.757	0.858	2.26096e-09	1.41515e-08	EPH receptor B2	EPHB2	chr1p36.1-p35
235439_at	4.015	4.872	0.857	4.40479e-08	1.64643e-07	RNA binding motif, single stranded interacting protein 2	RBMS2	chr12q13.3
228042_at	5.488	6.345	0.857	1.97716e-09	1.27192e-08	ADP-ribosylarginine hydrolase	ADPRH	chr3q13.31-q13.33
229215_at	6.573	7.43	0.857	3.79484e-10	3.34396e-09	achaete-scute family bHLH transcription factor 2	ASCL2	chr11p15.5
212569_at	9.342	10.198	0.856	2.85771e-07	7.55527e-07	structural maintenance of chromosomes flexible hinge domain containing 1	SMCHD1	chr18p11.32
211366_x_at	10.705	11.56	0.855	7.02791e-09	3.58792e-08	caspase 1	CASP1	chr11q23
203420_at	10.392	11.246	0.854	1.90384e-07	5.38272e-07	family with sequence similarity 8, member A1	FAM8A1	chr6p23
202068_s_at	6.56	7.414	0.854	1.38424e-08	6.28811e-08	low density lipoprotein receptor	LDLR	chr19p13.2
212310_at	5.332	6.186	0.854	4.06741e-07	1.00073e-06	melanoma inhibitory activity family, member 3	MIA3	chr1q41
200974_at	7.25	8.104	0.854	1.87187e-07	5.30699e-07	actin, alpha 2, smooth muscle, aorta	ACTA2	chr10q23.3
215838_at	10.063	10.917	0.854	3.86973e-06	6.3971e-06	leukocyte immunoglobulin-like receptor, subfamily A (with TM domain), member 5	LILRA5	chr19q13.4
222498_at	7.593	8.447	0.854	4.36954e-06	7.07337e-06	5-azacytidine induced 2	AZI2	chr3p24.1
1570197_at	6.672	7.525	0.853	2.46822e-07	6.69095e-07	uncharacterized LOC105372343	LOC105372343	---
237105_at	3.944	4.796	0.852	8.18264e-09	4.0618e-08	uncharacterized LOC101927027	LOC101927027	chr2q31.2
226406_at	7.821	8.672	0.851	1.30756e-06	2.62128e-06	chromosome 18 open reading frame 25	C18orf25	chr18q21.1
203505_at	8.178	9.029	0.851	0.000167572	0.00015034	ATP binding cassette subfamily A member 1	ABCA1	chr9q31.1
224642_at	6.302	7.152	0.85	2.58082e-07	6.94109e-07	forty-two-three domain containing 1	FYTTD1	chr3q29
1556601_a_at	8.366	9.215	0.849	7.51026e-09	3.79252e-08	spermatogenesis associated 13	SPATA13	chr13q12.12
223705_s_at	9.263	10.112	0.849	4.07567e-07	1.00186e-06	GC-rich promoter binding protein 1	GPBP1	chr5q11.2
211368_s_at	10.088	10.935	0.847	9.65958e-08	3.11541e-07	caspase 1	CASP1	chr11q23
217897_at	6.748	7.594	0.846	2.55773e-08	1.04597e-07	FXYD domain containing ion transport regulator 6	FXYD6	chr11q23.3
206661_at	4.438	5.283	0.845	4.19096e-10	3.6262e-09	DBF4 zinc finger B	DBF4B	chr17q21.31|17q21
229367_s_at	9.482	10.327	0.845	6.93414e-08	2.37979e-07	GTPase, IMAP family member 6	GIMAP6	---
213016_at	6.803	7.648	0.845	7.96212e-06	1.16625e-05	bobby sox homolog (Drosophila)	BBX	chr3q13.1
220384_at	6.176	7.021	0.845	6.43305e-06	9.76263e-06	NME/NM23 family member 8	NME8	chr7p14.1
210362_x_at	4.836	5.68	0.844	2.31804e-09	1.44081e-08	promyelocytic leukemia	PML	chr15q22
213038_at	8.654	9.497	0.843	1.05488e-06	2.19256e-06	ring finger protein 19B	RNF19B	chr1p35.1
1563542_a_at	6.219	7.061	0.842	1.07312e-09	7.83044e-09	sex comb on midleg-like 4 (Drosophila)	SCML4	chr6q21
217518_at	5.995	6.837	0.842	1.5362e-10	1.62283e-09	myoferlin	MYOF	chr10q24
215933_s_at	8.702	9.543	0.841	3.81995e-06	6.32648e-06	hematopoietically expressed homeobox	HHEX	chr10q23.33
208121_s_at	5.413	6.253	0.84	6.93261e-06	1.03922e-05	protein tyrosine phosphatase, receptor type, O	PTPRO	chr12p13.3-p13.2|12p13-p12
204068_at	6.43	7.269	0.839	0.000153038	0.000138847	serine/threonine kinase 3	STK3	chr8q22.2
219017_at	5.939	6.778	0.839	0.000269796	0.000224217	ethanolamine kinase 1	ETNK1	chr12p12.1
243934_at	6.68	7.518	0.838	8.05175e-09	4.00792e-08	outer dense fiber of sperm tails 3B	ODF3B	chr22q13.33
1565732_at	4.462	5.298	0.836	4.45804e-06	7.18583e-06	---	---	---
201560_at	7.891	8.726	0.835	6.66717e-07	1.49727e-06	chloride intracellular channel 4	CLIC4	chr1p36.11
201995_at	6.893	7.728	0.835	1.69436e-06	3.24437e-06	exostosin glycosyltransferase 1	EXT1	chr8q24.11
203504_s_at	7.803	8.638	0.835	5.84003e-05	6.18481e-05	ATP binding cassette subfamily A member 1	ABCA1	chr9q31.1
213851_at	6.85	7.685	0.835	4.22489e-11	5.59701e-10	transmembrane protein 110	TMEM110	chr3p21.1
224641_at	8.759	9.594	0.835	9.60562e-08	3.10499e-07	forty-two-three domain containing 1	FYTTD1	chr3q29
201661_s_at	7.91	8.743	0.833	4.59633e-06	7.35747e-06	acyl-CoA synthetase long-chain family member 3	ACSL3	chr2q34-q35
202459_s_at	8.498	9.331	0.833	1.33888e-08	6.12086e-08	lipin 2	LPIN2	chr18p11.31
224872_at	8.623	9.455	0.832	4.15436e-08	1.56506e-07	disco-interacting protein 2 homolog B	DIP2B	chr12q13.12
226312_at	9.458	10.29	0.832	6.19686e-07	1.41109e-06	RPTOR independent companion of MTOR, complex 2	RICTOR	chr5p13.1
236487_at	6.443	7.274	0.831	6.2507e-05	6.55872e-05	sodium channel and clathrin linker 1	SCLT1	chr4q28.2
220252_x_at	7.608	8.438	0.83	1.93544e-08	8.27627e-08	chromosome X open reading frame 21	CXorf21	chrXp21.2
226556_at	6.544	7.374	0.83	5.96874e-07	1.36695e-06	mitogen-activated protein kinase kinase kinase 13	MAP3K13	chr3q27
218625_at	4.632	5.461	0.829	0.000238286	0.000202056	neuritin 1	NRN1	chr6p25.1
228707_at	4.092	4.921	0.829	1.23403e-07	3.78207e-07	claudin 23	CLDN23	chr8p23.1
236193_at	7.108	7.936	0.828	7.58565e-05	7.72333e-05	histone cluster 1, H2bc	HIST1H2BC	chr6p22.1
235457_at	8.049	8.876	0.827	2.07729e-07	5.77972e-07	mastermind-like transcriptional coactivator 2	MAML2	chr11q21
55692_at	8.31	9.137	0.827	2.28387e-08	9.49674e-08	engulfment and cell motility 2	ELMO2	chr20q13
1569004_at	6.488	7.313	0.825	8.84608e-05	8.79441e-05	CARD8 antisense RNA 1	CARD8-AS1	---
209545_s_at	8.554	9.379	0.825	1.37177e-10	1.47708e-09	receptor-interacting serine-threonine kinase 2	RIPK2	chr8q21
233476_at	8.573	9.398	0.825	6.76443e-10	5.35982e-09	---	---	---
1553535_a_at	6.374	7.198	0.824	2.49331e-10	2.36251e-09	Ran GTPase activating protein 1	RANGAP1	chr22q13
209970_x_at	10.752	11.576	0.824	6.37227e-09	3.31453e-08	caspase 1	CASP1	chr11q23
235130_at	5.348	6.172	0.824	3.30558e-07	8.51365e-07	pantothenate kinase 2	PANK2	chr20p13
229074_at	6.358	7.181	0.823	2.13885e-08	8.96649e-08	EH domain containing 4	EHD4	chr15q11.1
205228_at	5.486	6.308	0.822	2.86318e-09	1.73277e-08	RNA binding motif, single stranded interacting protein 2	RBMS2	chr12q13.3
210845_s_at	9.884	10.706	0.822	1.71e-08	7.48311e-08	plasminogen activator, urokinase receptor	PLAUR	chr19q13
203840_at	4.73	5.551	0.821	4.79478e-05	5.24352e-05	basic leucine zipper nuclear factor 1	BLZF1	chr1q24
221584_s_at	4.5	5.32	0.82	0.000247467	0.000208437	potassium channel, calcium activated large conductance subfamily M alpha, member 1	KCNMA1	chr10q22.3
208933_s_at	8.798	9.617	0.819	3.43219e-11	4.73435e-10	lectin, galactoside-binding, soluble, 8	LGALS8	chr1q43
240287_at	5.039	5.858	0.819	9.76686e-07	2.05806e-06	immunoresponsive 1 homolog (mouse)	IRG1	chr13q22.3
227236_at	7.929	8.748	0.819	1.25014e-05	1.69876e-05	tetraspanin 2	TSPAN2	chr1p13.2
215602_at	6.283	7.101	0.818	7.87508e-08	2.63834e-07	FYVE, RhoGEF and PH domain containing 2	FGD2	chr6p21.2
1558569_at	6.108	6.925	0.817	0.000170981	0.000152883	uncharacterized LOC100131541	LOC100131541	chr11q21
212247_at	7.151	7.968	0.817	2.17142e-09	1.36745e-08	nucleoporin 205kDa	NUP205	chr7q33
220467_at	7.892	8.709	0.817	1.23414e-07	3.78207e-07	---	---	---
210524_x_at	8.465	9.281	0.816	1.12335e-13	5.78632e-12	---	---	---
206486_at	5.621	6.437	0.816	2.61212e-06	4.63657e-06	lymphocyte-activation gene 3	LAG3	chr12p13.32
227545_at	5.631	6.444	0.813	1.1032e-06	2.27334e-06	BRCA1 associated RING domain 1	BARD1	chr2q35
228248_at	8.733	9.546	0.813	7.23786e-06	1.07665e-05	RPTOR independent companion of MTOR, complex 2	RICTOR	chr5p13.1
235479_at	6.503	7.315	0.812	4.83549e-11	6.19362e-10	cytoplasmic polyadenylation element binding protein 2	CPEB2	chr4p15.33
219283_at	7.899	8.71	0.811	1.35796e-05	1.81827e-05	C1GALT1 specific chaperone 1	C1GALT1C1	chrXq24
215231_at	4.136	4.947	0.811	6.80008e-08	2.34208e-07	protein kinase, AMP-activated, gamma 2 non-catalytic subunit	PRKAG2	chr7q36.1
217078_s_at	8.894	9.705	0.811	1.02723e-05	1.44117e-05	CD300a molecule	CD300A	chr17q25.1
225272_at	8.645	9.455	0.81	4.33879e-10	3.72267e-09	spermidine/spermine N1-acetyltransferase family member 2	SAT2	chr17p13.1
202907_s_at	9.283	10.092	0.809	4.66581e-09	2.57133e-08	nibrin	NBN	chr8q21
213000_at	7.885	8.694	0.809	2.47438e-05	3.00208e-05	MORC family CW-type zinc finger 3	MORC3	chr21q22.13
230866_at	6.593	7.402	0.809	4.56606e-05	5.02944e-05	cysteinyl leukotriene receptor 1	CYSLTR1	chrXq13.2-q21.1
205067_at	9.233	10.042	0.809	4.95073e-07	1.17346e-06	interleukin 1 beta	IL1B	chr2q14
207565_s_at	6.14	6.948	0.808	7.0352e-08	2.40871e-07	major histocompatibility complex, class I-related	MR1	chr1q25.3
214748_at	7.075	7.881	0.806	0.000100969	9.83216e-05	NEDD4 binding protein 2-like 2	N4BP2L2	chr13q13.1
230795_at	6.555	7.361	0.806	7.48647e-07	1.65256e-06	---	---	---
204601_at	9.331	10.136	0.805	6.7402e-09	3.47317e-08	NEDD4 binding protein 1	N4BP1	chr16q12.1
222846_at	7.146	7.951	0.805	0.00210356	0.00128534	RAB8B, member RAS oncogene family	RAB8B	chr15q22.2
243052_at	6.19	6.995	0.805	9.17831e-12	1.64846e-10	MOB kinase activator 3C	MOB3C	chr1p33
201601_x_at	12.713	13.517	0.804	1.32381e-12	3.52994e-11	interferon induced transmembrane protein 1 /// interferon induced transmembrane protein 2	IFITM1 /// IFITM2	chr11p15.5
235056_at	8.256	9.06	0.804	1.57438e-07	4.62253e-07	ets variant 6	ETV6	chr12p13
232622_at	4.874	5.677	0.803	4.65593e-09	2.56895e-08	---	---	---
1555154_a_at	6.631	7.433	0.802	8.14178e-07	1.77238e-06	QKI, KH domain containing, RNA binding	QKI	chr6q26
214838_at	6.787	7.588	0.801	2.43286e-10	2.32056e-09	SFT2 domain containing 2	SFT2D2	chr1q24.2
218927_s_at	7.759	8.56	0.801	5.0538e-09	2.73793e-08	carbohydrate (chondroitin 4) sulfotransferase 12 /// uncharacterized LOC101927181	CHST12 /// LOC101927181	chr7p22 /// chr7p22.3
224148_at	7.319	8.119	0.8	0.00299651	0.00173433	FYN binding protein	FYB	chr5p13.1
239761_at	6.393	7.192	0.799	3.89138e-07	9.64158e-07	glucosaminyl (N-acetyl) transferase 1, core 2	GCNT1	chr9q13
207614_s_at	7.899	8.697	0.798	9.09173e-10	6.82866e-09	cullin 1	CUL1	chr7q36.1
218447_at	8.178	8.974	0.796	5.51957e-07	1.28334e-06	C-x(9)-C motif containing 2	CMC2	chr16q23.2
203275_at	9.76	10.553	0.793	1.12342e-09	8.1478e-09	interferon regulatory factor 2	IRF2	chr4q34.1-q35.1
212125_at	6.25	7.043	0.793	4.64428e-11	6.02401e-10	Ran GTPase activating protein 1	RANGAP1	chr22q13
221385_s_at	5.536	6.329	0.793	2.63665e-07	7.04869e-07	free fatty acid receptor 3 /// G protein-coupled receptor 42 (gene/pseudogene)	FFAR3 /// GPR42	chr19q13.1
242713_at	5.738	6.531	0.793	6.55255e-08	2.27165e-07	---	---	---
205469_s_at	7.805	8.597	0.792	1.70488e-09	1.1323e-08	interferon regulatory factor 5	IRF5	chr7q32
241595_at	8.485	9.277	0.792	1.07486e-07	3.38499e-07	---	---	---
229174_at	6.158	6.949	0.791	0.00104756	0.000707869	chromosome 3 open reading frame 38	C3orf38	chr3p11.1
1569311_at	4.325	5.115	0.79	2.13639e-05	2.65168e-05	---	---	---
232670_at	6.169	6.959	0.79	1.21162e-08	5.64335e-08	---	---	---
216100_s_at	6.792	7.581	0.789	1.71188e-05	2.20372e-05	torsin A interacting protein 1	TOR1AIP1	chr1q24.2
233976_at	5.749	6.538	0.789	4.08581e-06	6.68651e-06	---	---	---
209906_at	8.68	9.468	0.788	7.47671e-09	3.77938e-08	complement component 3a receptor 1	C3AR1	chr12p13.31
226823_at	8.116	8.903	0.787	5.40778e-08	1.95906e-07	phosphatase and actin regulator 4	PHACTR4	chr1p35.3
241621_at	5.556	6.342	0.786	2.05284e-05	2.56305e-05	structural maintenance of chromosomes flexible hinge domain containing 1	SMCHD1	chr18p11.32
203839_s_at	7.912	8.697	0.785	2.27281e-08	9.46769e-08	tyrosine kinase, non-receptor, 2	TNK2	chr3q29
203020_at	9.053	9.837	0.784	2.91128e-07	7.67447e-07	RAB GTPase activating protein 1-like	RABGAP1L	chr1q24
220363_s_at	6.186	6.969	0.783	4.76186e-07	1.13589e-06	engulfment and cell motility 2	ELMO2	chr20q13
231695_at	6.216	6.999	0.783	1.1596e-07	3.60071e-07	---	---	---
1554594_at	5.507	6.289	0.782	3.66762e-05	4.19641e-05	Rho GTPase activating protein 27	ARHGAP27	chr17q21.31
213800_at	4.887	5.669	0.782	3.68425e-06	6.14716e-06	complement factor H	CFH	chr1q32
227019_at	4.73	5.511	0.781	1.94262e-07	5.46865e-07	chromosome 1 open reading frame 226	C1orf226	chr1q23.3
211887_x_at	4.395	5.175	0.78	1.03668e-06	2.1591e-06	macrophage scavenger receptor 1	MSR1	chr8p22
233924_s_at	6.006	6.786	0.78	2.28062e-06	4.14983e-06	exocyst complex component 6	EXOC6	chr10q23.33
242916_at	6.642	7.422	0.78	2.92812e-07	7.70657e-07	centriolin	CNTRL	chr9q33.2
205699_at	4.395	5.174	0.779	2.17365e-06	3.99572e-06	mitogen-activated protein kinase kinase 6	MAP2K6	chr17q24.3
203276_at	6.362	7.141	0.779	6.21642e-05	6.52943e-05	lamin B1	LMNB1	chr5q23.2
244414_at	7.98	8.759	0.779	2.64763e-06	4.69147e-06	---	---	---
227877_at	7.554	8.331	0.777	4.5531e-08	1.69216e-07	annexin A2 receptor	ANXA2R	chr5p12
39402_at	8.813	9.589	0.776	6.94064e-07	1.55091e-06	interleukin 1 beta	IL1B	chr2q14
229937_x_at	8.682	9.457	0.775	2.69467e-06	4.75252e-06	leukocyte immunoglobulin-like receptor, subfamily B (with TM and ITIM domains), member 1	LILRB1	chr19q13.4
243699_at	7.191	7.966	0.775	4.21764e-07	1.0283e-06	uncharacterized LOC100507006	LOC100507006	chr2p14
1569495_at	4.212	4.986	0.774	2.06551e-06	3.82438e-06	sodium channel and clathrin linker 1	SCLT1	chr4q28.2
204279_at	11.679	12.453	0.774	4.89354e-13	1.75503e-11	proteasome subunit beta 9	PSMB9	chr6p21.3
221211_s_at	7.645	8.416	0.771	3.06139e-06	5.29185e-06	MAP3K7 C-terminal like	MAP3K7CL	chr21q22.3
202313_at	9.344	10.114	0.77	9.75965e-11	1.11017e-09	protein phosphatase 2, regulatory subunit B, alpha	PPP2R2A	chr8p21.2
212514_x_at	8.056	8.826	0.77	1.31298e-07	3.98217e-07	DEAD (Asp-Glu-Ala-Asp) box helicase 3, X-linked	DDX3X	chrXp11.3-p11.23
205153_s_at	5.771	6.541	0.77	1.54668e-07	4.56174e-07	CD40 molecule, TNF receptor superfamily member 5	CD40	chr20q12-q13.2
206925_at	6.984	7.754	0.77	6.00675e-06	9.21223e-06	ST8 alpha-N-acetyl-neuraminide alpha-2,8-sialyltransferase 4	ST8SIA4	chr5q21
202114_at	9.003	9.772	0.769	3.19667e-07	8.28072e-07	sorting nexin 2	SNX2	chr5q23
1564656_at	3.322	4.09	0.768	0.000125446	0.000117775	---	---	---
206129_s_at	5.102	5.87	0.768	5.14033e-08	1.87734e-07	arylsulfatase B	ARSB	chr5q14.1
231873_at	6.377	7.145	0.768	1.16218e-09	8.37806e-09	bone morphogenetic protein receptor type II	BMPR2	chr2q33-q34
203490_at	8.166	8.933	0.767	1.15116e-06	2.35312e-06	E74-like factor 4 (ets domain transcription factor)	ELF4	chrXq26
200984_s_at	8.326	9.092	0.766	0.000120136	0.00011371	CD59 molecule, complement regulatory protein	CD59	chr11p13
224806_at	10.211	10.977	0.766	3.63109e-06	6.06975e-06	tripartite motif containing 25	TRIM25	chr17q23.2
218589_at	8.297	9.061	0.764	0.000228479	0.000195241	lysophosphatidic acid receptor 6	LPAR6	chr13q14
202506_at	7.832	8.595	0.763	1.61848e-05	2.10234e-05	sperm specific antigen 2	SSFA2	chr2q31.3
214543_x_at	7.609	8.372	0.763	1.02516e-06	2.14258e-06	QKI, KH domain containing, RNA binding	QKI	chr6q26
218279_s_at	6.011	6.774	0.763	9.87304e-08	3.17309e-07	---	---	---
210045_at	6.273	7.035	0.762	1.05213e-09	7.7008e-09	isocitrate dehydrogenase 2 (NADP+), mitochondrial	IDH2	chr15q26.1
210152_at	6.14	6.902	0.762	4.99024e-07	1.17977e-06	leukocyte immunoglobulin-like receptor, subfamily B (with TM and ITIM domains), member 4	LILRB4	chr19q13.4
242405_at	7.933	8.694	0.761	6.16476e-06	9.41831e-06	---	---	---
1555214_a_at	7.41	8.171	0.761	0.000794221	0.000559941	C-type lectin domain family 7, member A	CLEC7A	chr12p13.2
206756_at	7.201	7.961	0.76	9.95818e-07	2.09346e-06	carbohydrate (N-acetylglucosamine 6-O) sulfotransferase 7	CHST7	chrXp11.23
226190_at	7.745	8.505	0.76	5.58717e-08	2.0018e-07	mitogen-activated protein kinase kinase kinase 13	MAP3K13	chr3q27
209451_at	8.83	9.59	0.76	3.48738e-05	4.02227e-05	TRAF family member-associated NFKB activator	TANK	chr2q24.2
210592_s_at	12.247	13.005	0.758	8.93563e-12	1.61854e-10	spermidine/spermine N1-acetyltransferase 1	SAT1	chrXp22.1
242407_at	9.144	9.9	0.756	3.80728e-07	9.46772e-07	---	---	---
206536_s_at	4.397	5.153	0.756	1.18755e-07	3.67003e-07	X-linked inhibitor of apoptosis, E3 ubiquitin protein ligase	XIAP	chrXq25
243791_at	4.357	5.111	0.754	4.03719e-09	2.28557e-08	---	---	---
220000_at	9.312	10.064	0.752	2.09226e-05	2.60497e-05	sialic acid binding Ig-like lectin 5	SIGLEC5	chr19q13.3
1554285_at	6.368	7.12	0.752	1.68083e-05	2.17075e-05	hepatitis A virus cellular receptor 2	HAVCR2	chr5q33.3
238423_at	8.4	9.152	0.752	3.30306e-07	8.5102e-07	synaptotagmin-like 3	SYTL3	chr6q25.3
1553906_s_at	10.984	11.735	0.751	4.48361e-09	2.49282e-08	FYVE, RhoGEF and PH domain containing 2	FGD2	chr6p21.2
201762_s_at	10.615	11.366	0.751	4.76739e-11	6.13928e-10	proteasome activator subunit 2	PSME2	chr14q11.2
209941_at	6.836	7.587	0.751	7.7541e-13	2.44682e-11	receptor (TNFRSF)-interacting serine-threonine kinase 1	RIPK1	chr6p25.2
224707_at	10.294	11.045	0.751	0.000131192	0.000122271	cysteine-rich transmembrane module containing 1	CYSTM1	chr5q31.3
213507_s_at	10.898	11.647	0.749	1.03807e-10	1.16525e-09	karyopherin (importin) beta 1	KPNB1	chr17q21.32
1555559_s_at	4.23	4.977	0.747	5.75961e-09	3.04443e-08	ubiquitin specific peptidase 25	USP25	chr21q11.2
224357_s_at	6.299	7.046	0.747	8.12891e-09	4.03988e-08	membrane-spanning 4-domains, subfamily A, member 4A	MS4A4A	chr11q12
1557698_at	4.04	4.786	0.746	1.59938e-05	2.08206e-05	uncharacterized LOC105379250	LOC105379250	---
228899_at	5.669	6.415	0.746	1.46018e-07	4.34953e-07	---	---	---
230383_x_at	7.31	8.056	0.746	0.000478014	0.000362445	schlafen family member 5	SLFN5	chr17q12
207652_s_at	5.309	6.053	0.744	2.2414e-07	6.16695e-07	chemerin chemokine-like receptor 1	CMKLR1	chr12q24.1
234326_at	6.225	6.968	0.743	7.52729e-06	1.11232e-05	---	---	---
1559835_at	6.424	7.167	0.743	3.99527e-05	4.50024e-05	long intergenic non-protein coding RNA 1410	LINC01410	chr9q13
215120_s_at	4.513	5.255	0.742	1.365e-09	9.54284e-09	sterile alpha motif domain containing 4A	SAMD4A	chr14q22.2
1556471_at	6.577	7.317	0.74	1.76601e-07	5.08526e-07	sex comb on midleg-like 4 (Drosophila)	SCML4	chr6q21
219290_x_at	9.066	9.806	0.74	5.50284e-08	1.98049e-07	dual adaptor of phosphotyrosine and 3-phosphoinositides	DAPP1	chr4q25-q27
1555968_a_at	7.141	7.88	0.739	2.29783e-05	2.81648e-05	---	---	---
212867_at	9.86	10.596	0.736	9.85248e-07	2.07488e-06	nuclear receptor coactivator 2	NCOA2	chr8q13.3
216203_at	5.052	5.788	0.736	0.000214864	0.000185373	serine palmitoyltransferase, long chain base subunit 2	SPTLC2	chr14q24.3
204269_at	8.056	8.791	0.735	2.22995e-06	4.08125e-06	Pim-2 proto-oncogene, serine/threonine kinase	PIM2	chrXp11.23
209850_s_at	7.962	8.697	0.735	9.52395e-08	3.08833e-07	CDC42 effector protein (Rho GTPase binding) 2	CDC42EP2	chr11q13
207002_s_at	7.492	8.226	0.734	4.54964e-05	5.01597e-05	pleiomorphic adenoma gene-like 1	PLAGL1	chr6q24-q25
205905_s_at	6.916	7.65	0.734	1.186e-12	3.27192e-11	MHC class I polypeptide-related sequence A /// MHC class I polypeptide-related sequence B	MICA /// MICB	chr6p21.3 /// chr6p21.33
205397_x_at	5.387	6.12	0.733	6.62941e-10	5.2708e-09	SMAD family member 3	SMAD3	chr15q22.33
201042_at	6.878	7.611	0.733	1.48275e-05	1.95615e-05	transglutaminase 2	TGM2	chr20q12
232464_at	5.168	5.901	0.733	1.4894e-08	6.68261e-08	tripartite motif containing 78, pseudogene	TRIM78P	chr11p15
207904_s_at	4.786	5.518	0.732	1.02084e-07	3.25726e-07	leucyl/cystinyl aminopeptidase	LNPEP	chr5q15
212446_s_at	6.586	7.317	0.731	8.45777e-05	8.4706e-05	ceramide synthase 6	CERS6	chr2q24.3
227629_at	3.697	4.428	0.731	7.03342e-07	1.56925e-06	prolactin receptor	PRLR	chr5p13.2
232843_s_at	9.085	9.816	0.731	2.01061e-07	5.63498e-07	dedicator of cytokinesis 8	DOCK8	chr9p24.3
208066_s_at	9.396	10.126	0.73	1.30669e-08	6.00429e-08	general transcription factor IIB	GTF2B	chr1p22-p21
235788_at	5.891	6.62	0.729	3.24322e-07	8.38012e-07	HLA complex group 18 (non-protein coding)	HCG18	chr6p21.3
219055_at	7.516	8.245	0.729	7.50931e-07	1.6558e-06	S1 RNA binding domain 1	SRBD1	chr2p21
239005_at	8.781	9.508	0.727	1.31648e-08	6.04156e-08	---	---	---
231858_x_at	7.734	8.46	0.726	9.2633e-05	9.15338e-05	adaptor-related protein complex 5, beta 1 subunit	AP5B1	chr11q13.1
235104_at	5.829	6.555	0.726	1.37902e-05	1.84062e-05	endoplasmic reticulum aminopeptidase 2	ERAP2	chr5q15
242542_at	4.508	5.232	0.724	3.8938e-09	2.22017e-08	---	---	---
242918_at	5.633	6.357	0.724	2.03302e-06	3.77395e-06	nuclear autoantigenic sperm protein (histone-binding)	NASP	chr1p34.1
218158_s_at	6.958	7.681	0.723	1.15199e-05	1.5863e-05	adaptor protein, phosphotyrosine interaction, PH domain and leucine zipper containing 1	APPL1	chr3p14.3
224102_at	4.788	5.511	0.723	5.16451e-07	1.21099e-06	purinergic receptor P2Y, G-protein coupled, 12	P2RY12	chr3q25.1
1570198_x_at	6.948	7.67	0.722	3.44382e-07	8.8033e-07	uncharacterized LOC105372343	LOC105372343	---
202953_at	5.834	6.555	0.721	5.17325e-05	5.57908e-05	complement component 1, q subcomponent, B chain	C1QB	chr1p36.12
215891_s_at	5.24	5.96	0.72	4.94235e-07	1.17193e-06	GM2 ganglioside activator	GM2A	chr5q33.1
242075_at	5.183	5.903	0.72	0.000157059	0.000141974	---	---	---
212409_s_at	7.839	8.559	0.72	5.02572e-07	1.18582e-06	torsin A interacting protein 1	TOR1AIP1	chr1q24.2
235885_at	4.064	4.783	0.719	0.000133585	0.000123973	purinergic receptor P2Y, G-protein coupled, 12	P2RY12	chr3q25.1
1568609_s_at	8.51	9.229	0.719	1.26913e-07	3.87539e-07	long intergenic non-protein coding RNA 623 /// long intergenic non-protein coding RNA 869 /// long intergenic non-protein coding RNA 1138 /// uncharacterized LOC103091866 /// uncharacterized LOC388692	LINC00623 /// LINC00869 /// LINC01138 /// LOC103091866 /// LOC388692	chr1q21.1 /// chr1q21.2
202177_at	5.491	6.209	0.718	1.25137e-06	2.5277e-06	growth arrest-specific 6	GAS6	chr13q34
222410_s_at	10.077	10.795	0.718	8.69089e-08	2.86746e-07	sorting nexin 6	SNX6	chr14q13.1
35820_at	8.801	9.519	0.718	1.80556e-08	7.84913e-08	GM2 ganglioside activator	GM2A	chr5q33.1
209955_s_at	4.628	5.345	0.717	1.09822e-07	3.4399e-07	fibroblast activation protein alpha	FAP	chr2q23
218815_s_at	6.113	6.83	0.717	4.96539e-10	4.13179e-09	transmembrane protein 51	TMEM51	chr1p36.21
243465_at	9.791	10.508	0.717	3.56888e-08	1.38075e-07	---	---	---
201216_at	9.805	10.518	0.713	3.51303e-09	2.04367e-08	endoplasmic reticulum protein 29	ERP29	chr12q24.13
201786_s_at	11.645	12.358	0.713	5.54575e-11	6.95436e-10	adenosine deaminase, RNA-specific	ADAR	chr1q21.3
202643_s_at	7.55	8.263	0.713	3.51965e-09	2.04587e-08	tumor necrosis factor, alpha-induced protein 3	TNFAIP3	chr6q23
204686_at	5.066	5.779	0.713	1.46729e-08	6.59855e-08	insulin receptor substrate 1	IRS1	chr2q36
222262_s_at	5.63	6.343	0.713	0.000103863	0.000100702	ethanolamine kinase 1	ETNK1	chr12p12.1
208426_x_at	5.307	6.02	0.713	9.84675e-05	9.64093e-05	killer cell immunoglobulin-like receptor, two domains, long cytoplasmic tail, 4	KIR2DL4	chr19q13.4
212737_at	9.413	10.124	0.711	2.1629e-09	1.36569e-08	GM2 ganglioside activator	GM2A	chr5q33.1
209318_x_at	8.049	8.759	0.71	1.01832e-05	1.43109e-05	pleiomorphic adenoma gene-like 1	PLAGL1	chr6q24-q25
31845_at	9.528	10.238	0.71	3.38731e-09	1.98179e-08	E74-like factor 4 (ets domain transcription factor)	ELF4	chrXq26
203052_at	6.737	7.446	0.709	1.25829e-09	8.94505e-09	complement component 2	C2	chr6p21.3
36564_at	9.037	9.746	0.709	1.31693e-05	1.77094e-05	ring finger protein 19B	RNF19B	chr1p35.1
1568619_s_at	6.681	7.389	0.708	1.43212e-08	6.47355e-08	inositol 1,4,5-trisphosphate receptor interacting protein-like 2	ITPRIPL2	chr16p12.3
208919_s_at	11.01	11.718	0.708	1.55249e-07	4.57321e-07	NAD kinase	NADK	chr1p36.33
223143_s_at	5.788	6.496	0.708	2.40546e-05	2.92938e-05	akirin 2	AKIRIN2	chr6q15
227235_at	4.886	5.594	0.708	4.0166e-05	4.52214e-05	guanylate cyclase 1, soluble, alpha 3	GUCY1A3	chr4q32.1
229200_at	6.668	7.375	0.707	9.93456e-10	7.34631e-09	---	---	---
208328_s_at	5.75	6.456	0.706	0.00363216	0.00204626	myocyte enhancer factor 2A	MEF2A	chr15q26
230550_at	8.309	9.014	0.705	0.000561257	0.000415719	membrane-spanning 4-domains, subfamily A, member 6A	MS4A6A	chr11q12.1
236703_at	8.354	9.058	0.704	2.20303e-07	6.07851e-07	---	---	---
243158_at	7.866	8.57	0.704	3.48267e-05	4.01814e-05	---	---	---
212990_at	7.915	8.618	0.703	0.000123477	0.000116308	synaptojanin 1	SYNJ1	chr21q22.2
204258_at	8.768	9.471	0.703	2.06063e-07	5.74227e-07	chromodomain helicase DNA binding protein 1	CHD1	chr5q15-q21
1562957_at	5.759	6.461	0.702	2.10857e-06	3.89606e-06	---	---	---
221881_s_at	4.947	5.649	0.702	2.35395e-08	9.74298e-08	chloride intracellular channel 4	CLIC4	chr1p36.11
209297_at	6.301	7.002	0.701	4.97757e-08	1.8272e-07	intersectin 1	ITSN1	chr21q22.1-q22.2
214022_s_at	13.121	13.822	0.701	1.88055e-12	4.80032e-11	interferon induced transmembrane protein 1	IFITM1	chr11p15.5
242907_at	9.402	10.101	0.699	8.55604e-07	1.84242e-06	guanylate binding protein 2, interferon-inducible	GBP2	chr1p22.2
204156_at	6.658	7.357	0.699	3.85021e-05	4.36177e-05	SIK family kinase 3	SIK3	chr11q23.3
219066_at	7.913	8.612	0.699	1.38798e-06	2.75631e-06	phosphopantothenoylcysteine decarboxylase	PPCDC	chr15q24.2
1565754_x_at	7.118	7.816	0.698	5.03467e-09	2.72963e-08	FYVE, RhoGEF and PH domain containing 2	FGD2	chr6p21.2
208959_s_at	9.861	10.559	0.698	3.66144e-08	1.4108e-07	endoplasmic reticulum protein 44	ERP44	chr9q31.1
1570225_at	5.409	6.106	0.697	1.82956e-05	2.32805e-05	transmembrane protein 150B	TMEM150B	chr19q13.42
213530_at	6.285	6.982	0.697	9.67914e-08	3.12032e-07	RAB3 GTPase activating protein subunit 1 (catalytic)	RAB3GAP1	chr2q21.3
226524_at	6.899	7.596	0.697	8.32897e-05	8.3556e-05	chromosome 3 open reading frame 38	C3orf38	chr3p11.1
232867_at	7.091	7.788	0.697	6.07418e-06	9.30372e-06	---	---	---
236528_at	6.61	7.307	0.697	0.000171638	0.000153336	---	---	---
238461_at	7.278	7.975	0.697	0.00624242	0.00324699	eukaryotic translation initiation factor 4E family member 3	EIF4E3	chr3p14
212535_at	8.704	9.401	0.697	1.67829e-06	3.21619e-06	myocyte enhancer factor 2A	MEF2A	chr15q26
209298_s_at	4.072	4.768	0.696	2.06017e-06	3.81646e-06	intersectin 1	ITSN1	chr21q22.1-q22.2
240747_at	4.325	5.021	0.696	2.93392e-05	3.46356e-05	uncharacterized LOC102724587	LOC102724587	---
212807_s_at	6.885	7.58	0.695	6.72e-07	1.50724e-06	sortilin 1	SORT1	chr1p13.3|1p21.3-p13.1
218223_s_at	8.568	9.263	0.695	1.06105e-09	7.75818e-09	pleckstrin homology domain containing, family O member 1	PLEKHO1	chr1q21.2
227021_at	6.787	7.482	0.695	5.84371e-05	6.1878e-05	lysine (K)-specific demethylase 1B	KDM1B	chr6p22.3
221528_s_at	8.335	9.03	0.695	1.06655e-08	5.03637e-08	engulfment and cell motility 2	ELMO2	chr20q13
228273_at	6.991	7.684	0.693	3.00311e-07	7.86027e-07	proline rich 11	PRR11	chr17q22
217371_s_at	4.447	5.14	0.693	0.000273181	0.000226661	interleukin 15	IL15	chr4q31
1552302_at	5.156	5.848	0.692	2.94689e-06	5.12428e-06	transmembrane protein 106A	TMEM106A	chr17q21.31
201970_s_at	8.262	8.954	0.692	7.8309e-08	2.62477e-07	nuclear autoantigenic sperm protein (histone-binding)	NASP	chr1p34.1
224990_at	8.059	8.751	0.692	4.63661e-05	5.09776e-05	small integral membrane protein 14	SMIM14	chr4p14
225503_at	8.193	8.884	0.691	5.8524e-10	4.7487e-09	dehydrogenase/reductase (SDR family) X-linked	DHRSX	chrXp22.33; Yp11.2
234594_at	8.338	9.029	0.691	4.86136e-05	5.30421e-05	ITPK1 antisense RNA 1	ITPK1-AS1	chr14q32.12
210223_s_at	7.173	7.864	0.691	1.13619e-08	5.31622e-08	major histocompatibility complex, class I-related	MR1	chr1q25.3
221044_s_at	7.623	8.314	0.691	7.34239e-07	1.62499e-06	tripartite motif containing 34 /// TRIM6-TRIM34 readthrough	TRIM34 /// TRIM6-TRIM34	chr11p15
202460_s_at	8.646	9.336	0.69	2.58874e-09	1.59114e-08	lipin 2	LPIN2	chr18p11.31
1553686_at	4.678	5.367	0.689	1.22205e-09	8.73067e-09	chromosome 18 open reading frame 25	C18orf25	chr18q21.1
219168_s_at	6.666	7.355	0.689	8.60251e-05	8.59995e-05	proline rich 5 (renal)	PRR5	chr22q13
222134_at	4.659	5.348	0.689	1.11008e-08	5.21443e-08	D-aspartate oxidase	DDO	chr6q21
231688_at	4.761	5.45	0.689	0.000224202	0.000192089	matrix metallopeptidase 8	MMP8	chr11q22.3
239448_at	6.791	7.48	0.689	3.93783e-06	6.49471e-06	---	---	---
201337_s_at	7.765	8.453	0.688	0.000355974	0.000282544	vesicle associated membrane protein 3	VAMP3	chr1p36.23
1554980_a_at	5.906	6.593	0.687	6.37491e-05	6.67051e-05	activating transcription factor 3	ATF3	chr1q32.3
232792_at	5.051	5.738	0.687	5.37037e-07	1.25312e-06	tripartite motif containing 69	TRIM69	chr15q21.1
228415_at	7.476	8.162	0.686	6.58502e-05	6.85139e-05	adaptor-related protein complex 1 sigma 2 subunit	AP1S2	chrXp22.2
226040_at	7.942	8.628	0.686	1.27675e-07	3.89202e-07	tripartite motif containing 56	TRIM56	chr7q22.1
237330_at	6.483	7.169	0.686	0.0001987	0.000173514	---	---	---
32069_at	10.815	11.501	0.686	1.66309e-09	1.11383e-08	NEDD4 binding protein 1	N4BP1	chr16q12.1
205732_s_at	3.864	4.549	0.685	5.03982e-05	5.46402e-05	nuclear receptor coactivator 2	NCOA2	chr8q13.3
206111_at	8.95	9.635	0.685	0.000220342	0.000189325	ribonuclease, RNase A family, 2 (liver, eosinophil-derived neurotoxin)	RNASE2	chr14q11.2
226474_at	9.831	10.515	0.684	1.20132e-10	1.31355e-09	NLR family, CARD domain containing 5	NLRC5	chr16q13
211395_x_at	10.152	10.834	0.682	5.20665e-05	5.61181e-05	Fc fragment of IgG, low affinity IIc, receptor for (CD32) (gene/pseudogene)	FCGR2C	chr1q23.3
227905_s_at	4.802	5.484	0.682	3.19621e-07	8.28072e-07	5-azacytidine induced 2	AZI2	chr3p24.1
244375_at	7.852	8.534	0.682	5.62707e-06	8.72885e-06	---	---	---
203454_s_at	8.915	9.596	0.681	2.03687e-09	1.29984e-08	antioxidant 1 copper chaperone	ATOX1	chr5q32
1564204_at	5.505	6.186	0.681	4.49463e-08	1.67303e-07	long intergenic non-protein coding RNA 869	LINC00869	chr1q21.1
229285_at	7.589	8.27	0.681	0.000527245	0.000394149	ribonuclease L (2',5'-oligoisoadenylate synthetase-dependent)	RNASEL	chr1q25
1565674_at	5.271	5.951	0.68	0.00036945	0.000291852	Fc fragment of IgG, low affinity IIa, receptor (CD32) /// Fc fragment of IgG, low affinity IIc, receptor for (CD32) (gene/pseudogene)	FCGR2A /// FCGR2C	chr1q23 /// chr1q23.3
212864_at	8.67	9.35	0.68	1.43955e-08	6.49822e-08	CDP-diacylglycerol synthase 2	CDS2	chr20p13
222216_s_at	6.938	7.617	0.679	1.27241e-07	3.88045e-07	mitochondrial ribosomal protein L17	MRPL17	chr11p15.5-p15.4
227175_at	5.132	5.81	0.678	2.6777e-06	4.73135e-06	myeloid cell leukemia 1	MCL1	chr1q21
229603_at	4.733	5.411	0.678	1.42961e-05	1.8979e-05	Bardet-Biedl syndrome 12	BBS12	chr4q27
1559777_at	6.108	6.784	0.676	0.00075058	0.000532892	MIR3945 host gene	MIR3945HG	---
200940_s_at	9.555	10.231	0.676	1.41388e-08	6.40653e-08	arginine-glutamic acid dipeptide (RE) repeats	RERE	chr1p36.23
224190_x_at	5.223	5.899	0.676	2.9049e-09	1.75096e-08	nucleotide-binding oligomerization domain containing 1	NOD1	chr7p14.3
225333_at	4.935	5.611	0.676	4.39288e-11	5.78952e-10	zinc finger protein 496	ZNF496	chr1q44
243576_at	4.911	5.587	0.676	4.40959e-07	1.0682e-06	---	---	---
1558699_a_at	6.461	7.137	0.676	0.00102153	0.000692888	HERPUD family member 2	HERPUD2	chr7p14.2
201559_s_at	5.092	5.767	0.675	1.47267e-09	1.01375e-08	chloride intracellular channel 4	CLIC4	chr1p36.11
206877_at	6.262	6.937	0.675	6.66776e-05	6.92943e-05	MAX dimerization protein 1	MXD1	chr2p13-p12
226843_s_at	7.846	8.521	0.675	1.17828e-10	1.29428e-09	PAP associated domain containing 5	PAPD5	chr16q12.1
232384_s_at	3.646	4.321	0.675	2.63308e-05	3.16202e-05	uncharacterized LOC101927272	LOC101927272	chr16q12.1
1565752_at	7.528	8.202	0.674	6.24305e-09	3.26389e-08	FYVE, RhoGEF and PH domain containing 2	FGD2	chr6p21.2
210659_at	5.609	6.283	0.674	2.45909e-07	6.6687e-07	chemerin chemokine-like receptor 1	CMKLR1	chr12q24.1
225093_at	8.92	9.594	0.674	1.01952e-06	2.13328e-06	utrophin	UTRN	chr6q24
1553568_a_at	5.41	6.083	0.673	1.24593e-05	1.69455e-05	histone cluster 1, H1t	HIST1H1T	chr6p21.3
208819_at	10.594	11.267	0.673	2.52843e-10	2.38947e-09	RAB8A, member RAS oncogene family	RAB8A	chr19p13.1
236863_at	6.509	7.182	0.673	1.32413e-08	6.06889e-08	chromosome 17 open reading frame 67	C17orf67	chr17q22
239740_at	7.241	7.914	0.673	1.30573e-05	1.75968e-05	ets variant 6	ETV6	chr12p13
205642_at	7.225	7.897	0.672	9.01592e-07	1.92356e-06	centriolin	CNTRL	chr9q33.2
219358_s_at	8.136	8.808	0.672	1.00383e-07	3.21588e-07	ArfGAP with dual PH domains 2	ADAP2	chr17q11.2
225502_at	9.702	10.374	0.672	5.73648e-07	1.32263e-06	dedicator of cytokinesis 8	DOCK8	chr9p24.3
212579_at	10.053	10.725	0.672	1.5768e-06	3.05845e-06	structural maintenance of chromosomes flexible hinge domain containing 1	SMCHD1	chr18p11.32
1569225_a_at	7.875	8.546	0.671	0.000262357	0.000219049	sex comb on midleg-like 4 (Drosophila)	SCML4	chr6q21
205884_at	6.195	6.866	0.671	0.00775454	0.00390441	integrin alpha 4	ITGA4	chr2q31.3
227792_at	8.09	8.761	0.671	9.64958e-08	3.1148e-07	inositol 1,4,5-trisphosphate receptor interacting protein-like 2	ITPRIPL2	chr16p12.3
203927_at	7.23	7.9	0.67	1.12133e-10	1.24123e-09	nuclear factor of kappa light polypeptide gene enhancer in B-cells inhibitor, epsilon	NFKBIE	chr6p21.1
209536_s_at	8.672	9.342	0.67	1.68025e-09	1.11978e-08	EH domain containing 4	EHD4	chr15q11.1
218383_at	9.271	9.941	0.67	2.07728e-06	3.84418e-06	HAUS augmin like complex subunit 4	HAUS4	chr14q11.2
225440_at	9.022	9.692	0.67	3.90439e-09	2.22444e-08	1-acylglycerol-3-phosphate O-acyltransferase 3	AGPAT3	chr21q22.3
203728_at	8.435	9.104	0.669	2.45953e-09	1.51823e-08	BCL2-antagonist/killer 1	BAK1	chr6p21.3
206474_at	4.434	5.102	0.668	3.22606e-10	2.90705e-09	cyclin-dependent kinase 17	CDK17	chr12q23.1
219666_at	10.066	10.734	0.668	3.12397e-06	5.36714e-06	membrane-spanning 4-domains, subfamily A, member 6A	MS4A6A	chr11q12.1
200985_s_at	8.633	9.3	0.667	0.000204624	0.000177943	CD59 molecule, complement regulatory protein	CD59	chr11p13
235196_at	6.242	6.909	0.667	0.00011795	0.000111939	cell division cycle 73	CDC73	chr1q25
1557616_at	4.92	5.586	0.666	1.74787e-10	1.77331e-09	zinc finger protein 496	ZNF496	chr1q44
219777_at	9.607	10.272	0.665	2.56378e-05	3.0933e-05	GTPase, IMAP family member 6	GIMAP6	---
1557575_at	4.504	5.169	0.665	2.03265e-07	5.68417e-07	starch binding domain 1	STBD1	chr4q21.1
1553769_at	4.847	5.512	0.665	1.23242e-08	5.72166e-08	SLAM family member 9	SLAMF9	chr1q23.2
241686_x_at	7.209	7.873	0.664	4.06501e-08	1.53939e-07	---	---	---
1552510_at	8.202	8.866	0.664	1.02363e-10	1.15265e-09	solute carrier family 34 (type II sodium/phosphate cotransporter), member 3	SLC34A3	chr9q34
239314_at	4.735	5.399	0.664	2.5058e-07	6.76977e-07	NHL repeat containing 3	NHLRC3	chr13q13.3
243252_at	4.676	5.339	0.663	0.000206317	0.000179141	---	---	---
217427_s_at	7.989	8.652	0.663	7.90172e-06	1.15858e-05	histone cell cycle regulator	HIRA	chr22q11.21
206271_at	4.01	4.671	0.661	2.6325e-06	4.66697e-06	toll-like receptor 3	TLR3	chr4q35
209615_s_at	7.807	8.468	0.661	6.03429e-05	6.36419e-05	p21 protein (Cdc42/Rac)-activated kinase 1	PAK1	chr11q13-q14
218043_s_at	5.76	6.421	0.661	1.83482e-05	2.33308e-05	5-azacytidine induced 2	AZI2	chr3p24.1
212628_at	8.6	9.26	0.66	0.000185929	0.000164424	protein kinase N2	PKN2	chr1p22.2
241923_x_at	4.369	5.029	0.66	5.10648e-08	1.86687e-07	N-acetylneuraminic acid synthase	NANS	chr9p24.1-p23
228497_at	7.58	8.239	0.659	0.000854438	0.000595084	solute carrier family 22, member 15	SLC22A15	chr1p13.1
1557984_s_at	4.266	4.925	0.659	1.36628e-06	2.72075e-06	RNA polymerase II associated protein 3	RPAP3	chr12q13.11
201841_s_at	8.272	8.93	0.658	4.70644e-05	5.16503e-05	heat shock 27kDa protein 1	HSPB1	chr7q11.23
215049_x_at	8.527	9.184	0.657	3.52057e-07	8.94212e-07	CD163 molecule	CD163	chr12p13.3
221942_s_at	6.206	6.863	0.657	5.51948e-06	8.59541e-06	guanylate cyclase 1, soluble, alpha 3	GUCY1A3	chr4q32.1
229920_at	6.243	6.9	0.657	1.59075e-11	2.51882e-10	---	---	---
225859_at	7.469	8.126	0.657	2.20978e-07	6.09165e-07	X-linked inhibitor of apoptosis, E3 ubiquitin protein ligase	XIAP	chrXq25
201297_s_at	7.784	8.439	0.655	0.000321065	0.000259634	MOB kinase activator 1A	MOB1A	chr2p13.1
210219_at	4.918	5.573	0.655	7.42546e-06	1.10022e-05	SP100 nuclear antigen	SP100	chr2q37.1
215496_at	4.793	5.448	0.655	1.98738e-09	1.27735e-08	sterile alpha motif domain containing 4A	SAMD4A	chr14q22.2
242714_at	7.102	7.757	0.655	0.000188389	0.000166121	uncharacterized LOC101928429	LOC101928429	---
1562031_at	5.484	6.138	0.654	0.00019498	0.000170849	Janus kinase 2	JAK2	chr9p24
202898_at	5.679	6.333	0.654	5.46623e-08	1.97226e-07	syndecan 3	SDC3	chr1p35.2
225251_at	10.266	10.92	0.654	4.60548e-06	7.36719e-06	RAB24, member RAS oncogene family	RAB24	chr5q35.3
1559125_at	3.87	4.523	0.653	8.43257e-06	1.2248e-05	---	---	---
209571_at	8.05	8.703	0.653	9.74549e-09	4.68205e-08	corepressor interacting with RBPJ, 1	CIR1	chr2q31.1
225224_at	9.108	9.761	0.653	8.13285e-09	4.03988e-08	nucleolar protein 4-like	NOL4L	chr20q11.21
205505_at	5.787	6.439	0.652	1.47431e-09	1.01391e-08	glucosaminyl (N-acetyl) transferase 1, core 2	GCNT1	chr9q13
233575_s_at	6.053	6.705	0.652	0.00201797	0.00123937	transducin-like enhancer of split 4	TLE4	chr9q21.31
211075_s_at	10.054	10.706	0.652	2.43058e-07	6.60138e-07	CD47 molecule	CD47	chr3q13.1-q13.2
204512_at	5.893	6.543	0.65	3.13473e-06	5.38048e-06	human immunodeficiency virus type I enhancer binding protein 1	HIVEP1	chr6p24-p22.3
210731_s_at	6.58	7.23	0.65	1.31061e-10	1.42006e-09	lectin, galactoside-binding, soluble, 8	LGALS8	chr1q43
204834_at	11.165	11.814	0.649	5.16431e-07	1.21099e-06	fibrinogen-like 2	FGL2	chr7q11.23
239143_x_at	5.732	6.381	0.649	5.05833e-05	5.47974e-05	ring finger protein 138, E3 ubiquitin protein ligase	RNF138	chr18q12.1
1552303_a_at	6.595	7.242	0.647	9.06916e-09	4.41983e-08	transmembrane protein 106A	TMEM106A	chr17q21.31
1563707_at	5.708	6.355	0.647	4.13641e-09	2.33621e-08	uncharacterized LOC105369748	LOC105369748	---
202101_s_at	8.096	8.743	0.647	0.000121584	0.000114841	v-ral simian leukemia viral oncogene homolog B	RALB	chr2q14.2
211336_x_at	8.841	9.488	0.647	9.60425e-08	3.10499e-07	leukocyte immunoglobulin-like receptor, subfamily B (with TM and ITIM domains), member 1	LILRB1	chr19q13.4
228056_s_at	6.394	7.041	0.647	1.02534e-05	1.43942e-05	napsin B aspartic peptidase, pseudogene	NAPSB	chr19q13.33
207943_x_at	6.81	7.456	0.646	0.000421772	0.00032625	pleiomorphic adenoma gene-like 1	PLAGL1	chr6q24-q25
1569095_at	6.938	7.583	0.645	0.00013707	0.000126569	MIR3945 host gene	MIR3945HG	---
241068_at	7.184	7.829	0.645	0.000163244	0.000146843	immunoglobulin superfamily, member 6	IGSF6	chr16p12.2
234987_at	10.631	11.275	0.644	6.4026e-09	3.32789e-08	SAM domain and HD domain 1	SAMHD1	chr20pter-q12
240310_at	5.546	6.19	0.644	5.33197e-06	8.35237e-06	torsin A interacting protein 1	TOR1AIP1	chr1q24.2
224175_s_at	5.994	6.637	0.643	1.75294e-08	7.64819e-08	tripartite motif containing 34 /// TRIM6-TRIM34 readthrough	TRIM34 /// TRIM6-TRIM34	chr11p15
228697_at	5.364	6.007	0.643	0.000242911	0.000205202	histidine triad nucleotide binding protein 3	HINT3	chr6q22.32
231519_at	4.662	5.305	0.643	2.01842e-11	3.02885e-10	---	---	---
214014_at	7.138	7.78	0.642	3.01438e-06	5.22391e-06	CDC42 effector protein (Rho GTPase binding) 2	CDC42EP2	chr11q13
218052_s_at	7.601	8.242	0.641	1.99475e-10	1.9681e-09	ATPase type 13A1	ATP13A1	chr19p13.11
204157_s_at	7.929	8.57	0.641	1.33646e-05	1.7935e-05	SIK family kinase 3	SIK3	chr11q23.3
232333_at	8.23	8.871	0.641	3.21564e-05	3.75169e-05	---	---	---
1555251_a_at	4.523	5.163	0.64	0.000435542	0.00033513	otoferlin	OTOF	chr2p23.1
202284_s_at	8.334	8.974	0.64	2.10975e-07	5.85186e-07	cyclin-dependent kinase inhibitor 1A (p21, Cip1)	CDKN1A	chr6p21.2
206662_at	9.773	10.413	0.64	3.40525e-06	5.76847e-06	glutaredoxin	GLRX	chr5q14
239047_at	4.901	5.541	0.64	4.82299e-10	4.0604e-09	family with sequence similarity 122C	FAM122C	chrXq26.3
205612_at	3.573	4.213	0.64	0.000311636	0.000253208	multimerin 1	MMRN1	chr4q22
208608_s_at	4.44	5.08	0.64	3.35836e-07	8.61863e-07	syntrophin, beta 1 (dystrophin-associated protein A1, 59kDa, basic component 1)	SNTB1	chr8q23-q24
210753_s_at	6.093	6.733	0.64	2.34617e-09	1.45452e-08	EPH receptor B1	EPHB1	chr3q21-q23
214115_at	5.474	6.114	0.64	8.7716e-08	2.8901e-07	vesicle associated membrane protein 5	VAMP5	chr2p11.2
219141_s_at	7.626	8.266	0.64	2.78754e-12	6.5342e-11	autophagy/beclin-1 regulator 1	AMBRA1	chr11p11.2
225418_at	6.997	7.637	0.64	6.92941e-07	1.54888e-06	poliovirus receptor-related 2 (herpesvirus entry mediator B)	PVRL2	chr19q13.2
227514_at	5.189	5.829	0.64	3.55027e-06	5.96312e-06	inositol 1,4,5-trisphosphate receptor interacting protein-like 2	ITPRIPL2	chr16p12.3
242726_at	5.086	5.726	0.64	1.18457e-05	1.62525e-05	---	---	---
207104_x_at	8.692	9.331	0.639	5.15748e-08	1.88168e-07	leukocyte immunoglobulin-like receptor, subfamily B (with TM and ITIM domains), member 1	LILRB1	chr19q13.4
217826_s_at	8.926	9.565	0.639	0.000432664	0.000333202	ubiquitin-conjugating enzyme E2, J1	UBE2J1	chr6q15
226259_at	7.627	8.265	0.638	2.46826e-05	2.99568e-05	exocyst complex component 6	EXOC6	chr10q23.33
202348_s_at	8.239	8.877	0.638	4.76131e-09	2.60704e-08	torsin family 1, member A (torsin A)	TOR1A	chr9q34
203922_s_at	8.68	9.318	0.638	3.67818e-09	2.11742e-08	cytochrome b-245, beta polypeptide	CYBB	chrXp21.1
214056_at	8.929	9.567	0.638	1.38319e-05	1.84481e-05	myeloid cell leukemia 1	MCL1	chr1q21
222442_s_at	7.907	8.545	0.638	6.69407e-07	1.50267e-06	ADP-ribosylation factor like GTPase 8B	ARL8B	chr3p26.1
225895_at	3.677	4.315	0.638	9.89149e-05	9.6768e-05	synaptopodin 2	SYNPO2	chr4q26
1552798_a_at	7.842	8.479	0.637	2.27001e-05	2.7881e-05	toll-like receptor 4	TLR4	chr9q33.1
201325_s_at	4.837	5.474	0.637	1.74653e-07	5.03926e-07	epithelial membrane protein 1	EMP1	chr12p12.3
204715_at	5.356	5.993	0.637	2.02369e-05	2.53372e-05	pannexin 1	PANX1	chr11q21
216607_s_at	5.602	6.239	0.637	3.12837e-05	3.66178e-05	cytochrome P450, family 51, subfamily A, polypeptide 1 /// leucine-rich repeats and death domain containing 1	CYP51A1 /// LRRD1	chr7q21.2
205345_at	6.325	6.961	0.636	1.84409e-07	5.24688e-07	BRCA1 associated RING domain 1	BARD1	chr2q35
220302_at	7.103	7.739	0.636	0.000262989	0.000219526	male germ cell-associated kinase	MAK	chr6p24
227041_at	6.506	7.142	0.636	0.00015796	0.000142644	SEC14 and spectrin domains 1	SESTD1	chr2q31.2
230261_at	7.373	8.009	0.636	0.000711688	0.000509415	ST8 alpha-N-acetyl-neuraminide alpha-2,8-sialyltransferase 4	ST8SIA4	chr5q21
212862_at	8.288	8.924	0.636	1.25557e-08	5.80286e-08	CDP-diacylglycerol synthase 2	CDS2	chr20p13
1555565_s_at	7.115	7.75	0.635	2.68489e-07	7.15126e-07	TAP binding protein (tapasin)	TAPBP	chr6p21.3
235514_at	7.852	8.486	0.634	9.99652e-05	9.75693e-05	aspartic peptidase, retroviral-like 1	ASPRV1	chr2p13.3
241884_at	4.149	4.783	0.634	2.59546e-07	6.96999e-07	---	---	---
235076_at	7.96	8.594	0.634	4.78838e-08	1.76407e-07	calcium binding and coiled-coil domain 2	CALCOCO2	chr17q21.32
212768_s_at	5.084	5.717	0.633	0.00117187	0.000779238	olfactomedin 4	OLFM4	chr13q14.3
214618_at	4.732	5.365	0.633	0.000319941	0.000258871	CASP8 and FADD like apoptosis regulator	CFLAR	chr2q33-q34
219159_s_at	6.037	6.67	0.633	0.000300235	0.000245167	SLAM family member 7	SLAMF7	chr1q23.1-q24.1
209544_at	5.191	5.823	0.632	3.34845e-07	8.59626e-07	receptor-interacting serine-threonine kinase 2	RIPK2	chr8q21
209040_s_at	10.019	10.651	0.632	4.50074e-08	1.67444e-07	proteasome subunit beta 8	PSMB8	chr6p21.3
228846_at	10.714	11.346	0.632	2.63576e-05	3.16471e-05	MAX dimerization protein 1	MXD1	chr2p13-p12
1554059_at	5.691	6.322	0.631	1.59809e-07	4.67682e-07	SET domain and mariner transposase fusion gene	SETMAR	chr3p26.1
223464_at	7.091	7.722	0.631	2.52366e-07	6.80779e-07	oxysterol binding protein-like 5	OSBPL5	chr11p15.4
223861_at	4.08	4.711	0.631	0.000182134	0.000161526	HORMA domain containing 1	HORMAD1	chr1q21.3
229894_s_at	7.09	7.721	0.631	2.62114e-05	3.15032e-05	RAB43, member RAS oncogene family	RAB43	chr3q21.3
227015_at	6.626	7.257	0.631	4.92867e-08	1.8111e-07	aspartate beta-hydroxylase domain containing 2	ASPHD2	chr22q12.1
211888_x_at	5.826	6.456	0.63	7.85194e-07	1.71867e-06	caspase 10	CASP10	chr2q33-q34
218501_at	8.578	9.208	0.63	0.00030454	0.000248202	Rho guanine nucleotide exchange factor 3	ARHGEF3	chr3p14.3
218793_s_at	4.669	5.299	0.63	0.00412551	0.00228014	sex comb on midleg-like 1 (Drosophila)	SCML1	chrXp22
204769_s_at	6.353	6.983	0.63	2.11038e-05	2.62348e-05	transporter 2, ATP-binding cassette, sub-family B (MDR/TAP)	TAP2	chr6p21.3
213023_at	5.349	5.979	0.63	1.19976e-09	8.59712e-09	utrophin	UTRN	chr6q24
222986_s_at	10.397	11.027	0.63	1.65727e-08	7.29288e-08	shisa family member 5	SHISA5	chr3p21.31
232213_at	9.803	10.432	0.629	6.67422e-05	6.93414e-05	pellino E3 ubiquitin protein ligase 1	PELI1	chr2p13.3
208262_x_at	6.076	6.704	0.628	5.66839e-07	1.30988e-06	Mediterranean fever	MEFV	chr16p13.3
211749_s_at	9.077	9.705	0.628	0.000387971	0.000304038	vesicle associated membrane protein 3	VAMP3	chr1p36.23
216997_x_at	6.687	7.315	0.628	0.00221238	0.00134222	transducin-like enhancer of split 4	TLE4	chr9q21.31
217187_at	6.848	7.476	0.628	0.000439382	0.000337759	mucin 5AC, oligomeric mucus/gel-forming	MUC5AC	chr11p15.5
221802_s_at	7.071	7.699	0.628	0.00072702	0.000518887	shootin 1	SHTN1	chr10q25.3
226261_at	5.237	5.865	0.628	6.45385e-05	6.73935e-05	zinc and ring finger 2, E3 ubiquitin protein ligase	ZNRF2	chr7p14.3
228675_at	5.507	6.135	0.628	2.9899e-10	2.73199e-09	USP30 antisense RNA 1	USP30-AS1	chr12q24.11
210786_s_at	7.164	7.791	0.627	0.00171047	0.00107704	Fli-1 proto-oncogene, ETS transcription factor	FLI1	chr11q24.1-q24.3
219574_at	7.721	8.348	0.627	0.00129227	0.000847591	membrane associated ring finger 1	2019-03-01	chr4q32.2
203741_s_at	9.111	9.738	0.627	7.38138e-06	1.09437e-05	adenylate cyclase 7	ADCY7	chr16q12.1
1563130_a_at	6.02	6.646	0.626	1.93852e-05	2.44285e-05	---	---	---
205178_s_at	7.942	8.568	0.626	1.00153e-08	4.77649e-08	retinoblastoma binding protein 6	RBBP6	chr16p12.2
222876_s_at	7.404	8.03	0.626	2.29066e-09	1.42869e-08	ArfGAP with dual PH domains 2	ADAP2	chr17q11.2
33646_g_at	5.655	6.281	0.626	1.16791e-06	2.38262e-06	GM2 ganglioside activator	GM2A	chr5q33.1
1552501_a_at	7.59	8.215	0.625	4.91013e-10	4.10965e-09	G protein-coupled bile acid receptor 1	GPBAR1	chr2q35
208583_x_at	7.866	8.491	0.625	3.73617e-07	9.33114e-07	histone cluster 1, H2aj	HIST1H2AJ	chr6p22.1
226117_at	8.553	9.178	0.625	0.000284527	0.000234691	TRAF-interacting protein with forkhead-associated domain	TIFA	chr4q25
201298_s_at	9.95	10.574	0.624	8.32028e-07	1.80293e-06	MOB kinase activator 1A	MOB1A	chr2p13.1
202081_at	10.583	11.207	0.624	3.98557e-12	8.63685e-11	immediate early response 2	IER2	chr19p13.2
1555250_a_at	4.236	4.859	0.623	5.16847e-07	1.21153e-06	cytoplasmic polyadenylation element binding protein 3	CPEB3	chr10q23.32
207329_at	4.148	4.771	0.623	0.000542639	0.000403973	matrix metallopeptidase 8	MMP8	chr11q22.3
203507_at	7.304	7.927	0.623	3.77483e-09	2.16264e-08	CD68 molecule	CD68	chr17p13
230741_at	7.468	8.091	0.623	0.00100924	0.000685458	purinergic receptor P2X, ligand gated ion channel, 7	P2RX7	chr12q24
232591_s_at	6.43	7.052	0.622	0.000651485	0.000472881	transmembrane protein 30A	TMEM30A	chr6q14.1
236168_at	7.067	7.689	0.622	1.74763e-06	3.3286e-06	---	---	---
1553920_at	5.215	5.836	0.621	0.0118969	0.00558295	chromosome 9 open reading frame 84	C9orf84	chr9q31.3
1558249_s_at	7.119	7.74	0.621	0.000114958	0.000109593	syntaxin 16	STX16	chr20q13.32
227901_at	6.398	7.019	0.621	1.39796e-09	9.73534e-09	uncharacterized LOC648987	LOC648987	chr5p12
204006_s_at	9.386	10.006	0.62	0.00739127	0.00374728	Fc fragment of IgG, low affinity IIIa, receptor (CD16a) /// Fc fragment of IgG, low affinity IIIb, receptor (CD16b)	FCGR3A /// FCGR3B	chr1q23
205904_at	6.379	6.999	0.62	3.97075e-11	5.33364e-10	MHC class I polypeptide-related sequence A	MICA	chr6p21.33
224503_s_at	5.923	6.543	0.62	1.92188e-08	8.24484e-08	zinc finger, CCHC domain containing 2	ZCCHC2	chr18q21.33
212077_at	5.259	5.878	0.619	0.000439079	0.000337562	caldesmon 1	CALD1	chr7q33
213560_at	6.171	6.79	0.619	3.64809e-10	3.22256e-09	growth arrest and DNA-damage-inducible, beta	GADD45B	chr19p13.3
244342_at	4.389	5.008	0.619	1.32758e-05	1.78258e-05	protein associated with topoisomerase II homolog 1 (yeast)	PATL1	chr11q12.1
207046_at	5.015	5.633	0.618	3.76379e-07	9.38819e-07	histone cluster 2, H4a /// histone cluster 2, H4b	HIST2H4A /// HIST2H4B	chr1q21 /// chr1q21.2
218319_at	10.089	10.707	0.618	1.59717e-06	3.09128e-06	pellino E3 ubiquitin protein ligase 1	PELI1	chr2p13.3
235385_at	7.768	8.386	0.618	0.00508234	0.0027256	membrane associated ring finger 1	2019-03-01	chr4q32.2
203645_s_at	8.27	8.887	0.617	1.02286e-06	2.13963e-06	CD163 molecule	CD163	chr12p13.3
236492_at	8.812	9.429	0.617	5.62624e-08	2.00677e-07	protein phosphatase 2, regulatory subunit B, alpha	PPP2R2A	chr8p21.2
201353_s_at	6.17	6.787	0.617	0.000150293	0.000136719	bromodomain adjacent to zinc finger domain 2A	BAZ2A	chr12q13.3
239073_at	5.635	6.252	0.617	6.92384e-09	3.54235e-08	ankyrin repeat and FYVE domain containing 1	ANKFY1	chr17p13.3
212268_at	10.282	10.898	0.616	2.27388e-07	6.24675e-07	serpin peptidase inhibitor, clade B (ovalbumin), member 1	SERPINB1	chr6p25
202395_at	8.966	9.581	0.615	4.42578e-09	2.46855e-08	N-ethylmaleimide-sensitive factor	NSF	chr17q21
208373_s_at	5.988	6.602	0.614	2.60965e-08	1.06235e-07	pyrimidinergic receptor P2Y, G-protein coupled, 6	P2RY6	chr11q13.4
210528_at	7.043	7.657	0.614	1.82991e-06	3.45869e-06	major histocompatibility complex, class I-related	MR1	chr1q25.3
202748_at	9.944	10.558	0.614	4.71958e-08	1.7459e-07	guanylate binding protein 2, interferon-inducible	GBP2	chr1p22.2
203455_s_at	11.937	12.55	0.613	1.19821e-09	8.59463e-09	spermidine/spermine N1-acetyltransferase 1	SAT1	chrXp22.1
1552787_at	4.573	5.186	0.613	1.2365e-05	1.68585e-05	helicase (DNA) B	HELB	chr12q14.3|12q
210740_s_at	10.188	10.801	0.613	3.06305e-06	5.29185e-06	inositol-tetrakisphosphate 1-kinase	ITPK1	chr14q31
224602_at	10.397	11.01	0.613	6.99593e-06	1.04696e-05	chromosome 4 open reading frame 3	C4orf3	chr4q26
206058_at	5.303	5.915	0.612	4.96351e-10	4.13179e-09	solute carrier family 6 (neurotransmitter transporter), member 12	SLC6A12	chr12p13
226354_at	9.011	9.623	0.612	2.33107e-07	6.37942e-07	lactamase, beta	LACTB	chr15q22.1
202304_at	7.513	8.124	0.611	0.000579701	0.000427658	fibronectin type III domain containing 3A	FNDC3A	chr13q14.2
226551_at	6.846	7.457	0.611	1.68056e-09	1.11978e-08	receptor (TNFRSF)-interacting serine-threonine kinase 1	RIPK1	chr6p25.2
226655_at	4.656	5.266	0.61	7.2409e-08	2.45802e-07	syntaxin 17	STX17	chr9q31.1
232068_s_at	6.576	7.186	0.61	0.00222107	0.00134704	toll-like receptor 4	TLR4	chr9q33.1
234431_at	5.481	6.091	0.61	1.06908e-07	3.37218e-07	gelsolin	GSN	chr9q33
235458_at	7.638	8.248	0.61	9.15525e-06	1.30737e-05	hepatitis A virus cellular receptor 2	HAVCR2	chr5q33.3
200867_at	8.454	9.063	0.609	1.8075e-08	7.85277e-08	ring finger protein 114	RNF114	chr20q13.13
229344_x_at	6.014	6.623	0.609	1.64052e-07	4.78148e-07	ribosomal modification protein rimK-like family member B	RIMKLB	chr12p13.31
215318_at	6.698	7.306	0.608	0.00137218	0.000892175	mitochondrial inner membrane organizing system 1 pseudogene 1	MINOS1P1	chr13q13.1
212629_s_at	9.338	9.945	0.607	2.19449e-05	2.71206e-05	protein kinase N2	PKN2	chr1p22.2
218595_s_at	8.747	9.354	0.607	8.70688e-07	1.86874e-06	HEAT repeat containing 1	HEATR1	chr1q43
235159_at	5.538	6.145	0.607	0.000699332	0.000501772	---	---	---
238327_at	7.454	8.06	0.606	9.39917e-05	9.26722e-05	outer dense fiber of sperm tails 3B	ODF3B	chr22q13.33
217823_s_at	9.069	9.675	0.606	0.000765014	0.000541853	ubiquitin-conjugating enzyme E2, J1	UBE2J1	chr6q15
232685_at	8.688	9.294	0.606	1.11036e-06	2.28601e-06	---	---	---
233264_at	5.664	6.27	0.606	2.65621e-05	3.18392e-05	---	---	---
241891_at	9.46	10.066	0.606	5.13729e-06	8.08448e-06	---	---	---
1559331_x_at	4.055	4.66	0.605	5.55396e-08	1.99348e-07	---	---	---
1560443_at	8.763	9.368	0.605	0.000456875	0.000349059	---	---	---
211373_s_at	6.174	6.779	0.605	1.23028e-07	3.77606e-07	presenilin 2	PSEN2	chr1q42.13
219763_at	6.672	7.275	0.603	3.41594e-06	5.77606e-06	DENN/MADD domain containing 1A	DENND1A	chr9q33.3
227808_at	6.137	6.74	0.603	0.000507689	0.000381718	DnaJ (Hsp40) homolog, subfamily C, member 15	DNAJC15	chr13q14.1
1560705_at	4.256	4.859	0.603	0.000117005	0.00011116	solute carrier family 25 (mitochondrial iron transporter), member 28	SLC25A28	chr10q24.2
201668_x_at	7.032	7.635	0.603	1.33103e-05	1.78655e-05	myristoylated alanine-rich protein kinase C substrate	MARCKS	chr6q22.2
213803_at	9.021	9.624	0.603	1.48681e-05	1.96115e-05	karyopherin (importin) beta 1	KPNB1	chr17q21.32
242521_at	9.246	9.848	0.602	9.50413e-06	1.347e-05	CARD8 antisense RNA 1	CARD8-AS1	---
216565_x_at	11.625	12.226	0.601	4.82149e-09	2.63596e-08	---	---	---
218076_s_at	8.732	9.333	0.601	7.98612e-08	2.6631e-07	Rho GTPase activating protein 17	ARHGAP17	chr16p12.1
239759_at	5.536	6.137	0.601	0.000351108	0.000279672	---	---	---
201965_s_at	8.611	9.212	0.601	9.54237e-09	4.59987e-08	senataxin	SETX	chr9q34.13
207431_s_at	8.617	9.217	0.6	8.66035e-06	1.25266e-05	delta(4)-desaturase, sphingolipid 1	DEGS1	chr1q42.11
1564021_at	6.512	7.111	0.599	2.27793e-09	1.42453e-08	uncharacterized LOC100130456	LOC100130456	chr7p22.3
226669_at	6.954	7.553	0.599	6.38792e-06	9.70139e-06	ubiquitin specific peptidase 42	USP42	chr7p22.1
232194_at	5.445	6.044	0.599	0.000188281	0.000166094	methyltransferase like 4	METTL4	chr18p11.32
201061_s_at	10.324	10.922	0.598	8.2554e-07	1.79169e-06	stomatin	STOM	chr9q34.1
223136_at	5.557	6.155	0.598	0.000628362	0.000457998	androgen-induced 1	AIG1	chr6q24.2
227485_at	6.511	7.109	0.598	6.34597e-05	6.64314e-05	DEAD/H (Asp-Glu-Ala-Asp/His) box polypeptide 26B	DDX26B	chrXq26.3
238989_at	5.681	6.279	0.598	2.03204e-05	2.54322e-05	C1GALT1 specific chaperone 1	C1GALT1C1	chrXq24
217955_at	7.679	8.276	0.597	5.36513e-06	8.39331e-06	BCL2-like 13 (apoptosis facilitator)	BCL2L13	chr22q11.1
219998_at	5.455	6.052	0.597	4.8293e-05	5.27565e-05	lectin, galactoside-binding-like	LGALSL	chr2p14
210817_s_at	9.972	10.568	0.596	1.70212e-08	7.45364e-08	calcium binding and coiled-coil domain 2	CALCOCO2	chr17q21.32
211968_s_at	9.306	9.901	0.595	0.016831	0.00748087	heat shock protein 90kDa alpha (cytosolic), class A member 1	HSP90AA1	chr14q32.33
227091_at	5.891	6.486	0.595	4.38837e-06	7.09424e-06	coiled-coil domain containing 146	CCDC146	chr7q11.23
228088_at	6.308	6.903	0.595	7.36761e-05	7.53663e-05	SEC14 and spectrin domains 1	SESTD1	chr2q31.2
214808_at	8.262	8.857	0.595	8.37295e-06	1.21698e-05	tripartite motif containing 56	TRIM56	chr7q22.1
205142_x_at	6.25	6.844	0.594	9.31744e-06	1.32517e-05	ATP binding cassette subfamily D member 1	ABCD1	chrXq28
208405_s_at	9.951	10.545	0.594	2.86567e-05	3.39472e-05	CD164 molecule, sialomucin	CD164	chr6q21
212719_at	6.03	6.623	0.593	0.000993469	0.000676426	PH domain and leucine rich repeat protein phosphatase 1	PHLPP1	chr18q21.33
243026_x_at	7.071	7.664	0.593	4.8365e-05	5.2803e-05	X-linked inhibitor of apoptosis, E3 ubiquitin protein ligase	XIAP	chrXq25
201964_at	8.934	9.526	0.592	2.08769e-08	8.77769e-08	senataxin	SETX	chr9q34.13
222849_s_at	5.639	6.231	0.592	4.44666e-05	4.92668e-05	secernin 3	SCRN3	chr2q31.1
226490_at	4.371	4.963	0.592	2.55489e-07	6.87394e-07	NHS-like 1	NHSL1	chr6q23.3
218096_at	7.321	7.912	0.591	0.000229538	0.000195982	1-acylglycerol-3-phosphate O-acyltransferase 5	AGPAT5	chr8p23.1
216951_at	4.041	4.632	0.591	0.000234451	0.000199465	Fc fragment of IgG, high affinity Ia, receptor (CD64)	FCGR1A	chr1q21.2-q21.3
202665_s_at	9.159	9.749	0.59	2.11741e-06	3.90937e-06	WAS/WASL interacting protein family, member 1	WIPF1	chr2q31.1
226169_at	7.786	8.376	0.59	0.000198692	0.000173514	SET binding factor 2	SBF2	chr11p15.4
232304_at	9.709	10.299	0.59	2.97634e-05	3.50672e-05	pellino E3 ubiquitin protein ligase 1	PELI1	chr2p13.3
230733_at	8.266	8.855	0.589	0.00017718	0.000157835	---	---	---
231768_at	7.314	7.903	0.589	6.0978e-08	2.14599e-07	upstream transcription factor 1	USF1	chr1q22-q23
209310_s_at	9.408	9.996	0.588	1.03318e-05	1.44721e-05	caspase 4	CASP4	chr11q22.2-q22.3
223789_s_at	4.885	5.473	0.588	3.49872e-07	8.89292e-07	GTP binding protein 2	GTPBP2	chr6p21
210145_at	5.51	6.097	0.587	0.00188017	0.00116672	phospholipase A2, group IVA (cytosolic, calcium-dependent)	PLA2G4A	chr1q25
221060_s_at	7.611	8.198	0.587	0.00334402	0.0019077	toll-like receptor 4	TLR4	chr9q33.1
222589_at	6.88	7.467	0.587	0.000105305	0.000101825	nemo-like kinase	NLK	chr17q11.2
201009_s_at	12.186	12.772	0.586	1.75556e-07	5.06124e-07	thioredoxin interacting protein	TXNIP	chr1q21.1
200800_s_at	10.296	10.881	0.585	0.00162069	0.0010284	heat shock 70kDa protein 1A /// heat shock 70kDa protein 1B	HSPA1A /// HSPA1B	chr6p21.3
201532_at	8.962	9.547	0.585	9.39172e-05	9.26242e-05	proteasome subunit alpha 3	PSMA3	chr14q23
209732_at	8.122	8.707	0.585	0.0204571	0.00879132	C-type lectin domain family 2, member B	CLEC2B	chr12p13-p12
239027_at	8.234	8.819	0.585	2.9171e-06	5.08481e-06	dedicator of cytokinesis 8	DOCK8	chr9p24.3
207186_s_at	9.531	8.946	-0.585	4.29983e-08	1.61308e-07	bromodomain PHD finger transcription factor	BPTF	chr17q24.3
221011_s_at	9.704	9.119	-0.585	6.37e-06	9.67827e-06	limb bud and heart development	LBH	chr2p23.1
225125_at	8.71	8.125	-0.585	1.40486e-07	4.21626e-07	membrane magnesium transporter 1	MMGT1	chrXq26.3
226384_at	6.244	5.658	-0.586	0.000151584	0.000137736	phospholipid phosphatase 5	PLPP5	chr8p11.23
203150_at	7.908	7.322	-0.586	4.69815e-10	3.97396e-09	Rab9 effector protein with kelch motifs	RABEPK	chr9q33.3
204127_at	5.631	5.045	-0.586	8.22238e-05	8.2619e-05	replication factor C subunit 3	RFC3	chr13q13.2
213263_s_at	8.118	7.532	-0.586	3.29902e-08	1.2945e-07	poly(rC) binding protein 2	PCBP2	chr12q13.13
217466_x_at	8.391	7.805	-0.586	0.000286996	0.000236184	ribosomal protein S2	RPS2	chr16p13.3
221989_at	7.431	6.845	-0.586	1.63101e-06	3.13899e-06	ribosomal protein L10	RPL10	chrXq28
243964_at	5.538	4.952	-0.586	1.35668e-05	1.81723e-05	---	---	---
203538_at	8.834	8.247	-0.587	1.21634e-07	3.74127e-07	calcium modulating ligand	CAMLG	chr5q23
210164_at	9.873	9.286	-0.587	0.00145125	0.000934771	granzyme B	GZMB	chr14q11.2
212671_s_at	9.983	9.396	-0.587	0.000254655	0.000213588	major histocompatibility complex, class II, DQ alpha 1 /// major histocompatibility complex, class II, DQ alpha 2	HLA-DQA1 /// HLA-DQA2	chr6p21.3
217830_s_at	8.302	7.715	-0.587	3.42696e-11	4.73435e-10	NSFL1 (p97) cofactor (p47)	NSFL1C	chr20p13
221844_x_at	9.567	8.98	-0.587	6.35999e-08	2.2181e-07	signal peptidase complex subunit 3	SPCS3	chr4q34.2
225522_at	8.615	8.028	-0.587	3.70337e-08	1.4228e-07	AP2 associated kinase 1	AAK1	chr2p14
226873_at	5.487	4.9	-0.587	0.00138508	0.00089885	family with sequence similarity 63, member B	FAM63B	chr15q21.3
241786_at	6.999	6.412	-0.587	4.40645e-05	4.88816e-05	---	---	---
202850_at	7.429	6.842	-0.587	0.0019811	0.00121975	ATP binding cassette subfamily D member 3	ABCD3	chr1p21.3
228647_at	7.466	6.879	-0.587	7.16431e-08	2.43878e-07	uncharacterized LOC100049716	LOC100049716	chr12p13.33
221740_x_at	6.459	5.871	-0.588	4.50271e-07	1.08417e-06	leucine rich repeat containing 37, member A2	LRRC37A2	chr17q21.31
232511_at	5.661	5.073	-0.588	1.24981e-06	2.52527e-06	---	---	---
1558937_s_at	6.336	5.748	-0.588	0.000958037	0.0006553	---	---	---
217536_x_at	4.952	4.364	-0.588	0.000243065	0.000205308	---	---	---
219737_s_at	5.525	4.937	-0.588	7.90899e-05	7.99917e-05	protocadherin 9	PCDH9	chr13q21.32
229787_s_at	6.305	5.717	-0.588	0.00632638	0.00328233	O-linked N-acetylglucosamine (GlcNAc) transferase	OGT	chrXq13
225120_at	8.034	7.446	-0.588	3.92977e-05	4.43621e-05	purine-rich element binding protein B	PURB	chr7p13
244434_at	4.113	3.525	-0.588	5.66979e-05	6.03472e-05	G protein-coupled receptor 82	GPR82	chrXp11.4
203274_at	9.808	9.219	-0.589	1.73066e-08	7.56479e-08	coagulation factor VIII-associated 1 /// coagulation factor VIII-associated 2 /// coagulation factor VIII-associated 3	F8A1 /// F8A2 /// F8A3	chrXq28
212802_s_at	9.09	8.501	-0.589	1.27595e-08	5.88187e-08	GTPase activating protein and VPS9 domains 1	GAPVD1	chr9q33.3
214259_s_at	8.436	7.847	-0.589	1.30159e-08	5.98853e-08	aldo-keto reductase family 7, member A2	AKR7A2	chr1p36.13
217833_at	7.617	7.028	-0.589	0.00393362	0.00218941	synaptotagmin binding, cytoplasmic RNA interacting protein	SYNCRIP	chr6q14-q15
222750_s_at	6.859	6.27	-0.589	2.09382e-06	3.87179e-06	steroid 5 alpha-reductase 3	SRD5A3	chr4q12
227951_s_at	7.208	6.619	-0.589	1.83089e-08	7.93998e-08	family with sequence similarity 98, member C	FAM98C	chr19q13.2
242323_at	7.968	7.379	-0.589	1.55446e-07	4.57339e-07	caspase 6 /// phospholipase A2, group XIIA	CASP6 /// PLA2G12A	chr4q25
205804_s_at	8.389	7.799	-0.59	1.05082e-05	1.46785e-05	TRAF3 interacting protein 3	TRAF3IP3	chr1q32
1554455_at	7.636	7.046	-0.59	8.84283e-05	8.7924e-05	lines homolog 1	LINS1	chr15q26.3
200647_x_at	9.422	8.832	-0.59	1.14299e-07	3.55684e-07	eukaryotic translation initiation factor 3, subunit C /// eukaryotic translation initiation factor 3, subunit C-like	EIF3C /// EIF3CL	chr16p11.2
201916_s_at	7.603	7.013	-0.59	0.000187428	0.000165485	SEC63 homolog, protein translocation regulator	SEC63	chr6q21
209782_s_at	6.579	5.989	-0.59	5.06168e-07	1.19195e-06	D site of albumin promoter (albumin D-box) binding protein	DBP	chr19q13.3
212248_at	8.834	8.244	-0.59	4.18665e-06	6.82351e-06	metadherin	MTDH	chr8q22.1
212414_s_at	9.469	8.879	-0.59	0.000100224	9.77426e-05	glyoxylate reductase 1 homolog (Arabidopsis) /// septin 6	GLYR1 /// SEPT6	chr16p13.3 /// chrXq24
221861_at	8.254	7.664	-0.59	4.40376e-09	2.46393e-08	arrestin, beta 1	ARRB1	chr11q13
224793_s_at	8.911	8.321	-0.59	0.00160711	0.00102131	transforming growth factor, beta receptor 1	TGFBR1	chr9q22
224998_at	5.695	5.105	-0.59	9.37936e-08	3.04558e-07	CKLF-like MARVEL transmembrane domain containing 4	CMTM4	chr16q21-q22.1
226388_at	5.39	4.8	-0.59	1.2405e-05	1.68951e-05	transcription elongation factor A (SII), 3	TCEA3	chr1p36.12
227277_at	7.686	7.096	-0.59	2.03235e-05	2.54322e-05	metadherin	MTDH	chr8q22.1
229035_s_at	6.854	6.264	-0.59	1.6955e-06	3.24482e-06	kelch domain containing 4 /// uncharacterized LOC105371397	KLHDC4 /// LOC105371397	chr16q24
235374_at	6.513	5.923	-0.59	1.61266e-05	2.09706e-05	---	---	---
242743_at	7.873	7.283	-0.59	5.38044e-07	1.25465e-06	---	---	---
242759_at	4.835	4.245	-0.59	5.0581e-05	5.47974e-05	---	---	---
243729_at	5.016	4.426	-0.59	8.76568e-05	8.73386e-05	---	---	---
211569_s_at	6.033	5.443	-0.59	2.74405e-07	7.28449e-07	hydroxyacyl-CoA dehydrogenase	HADH	chr4q22-q26
222447_at	8.531	7.941	-0.59	1.48258e-09	1.01764e-08	methyltransferase like 9	METTL9	chr16p12.2
242560_at	5.775	5.185	-0.59	4.93202e-06	7.81978e-06	Fanconi anemia complementation group D2	FANCD2	chr3p26
208796_s_at	8.851	8.261	-0.59	0.000317343	0.000257059	cyclin G1	CCNG1	chr5q32-q34
200082_s_at	9.35	8.759	-0.591	0.004048	0.0022444	ribosomal protein S7	RPS7	chr2p25
207681_at	6.504	5.913	-0.591	1.068e-05	1.48748e-05	chemokine (C-X-C motif) receptor 3	CXCR3	chrXq13
225366_at	6.305	5.714	-0.591	0.00144105	0.000929286	phosphoglucomutase 2	PGM2	chr4p14
1558826_at	5.138	4.547	-0.591	6.80938e-06	1.02331e-05	zinc finger protein 831	ZNF831	chr20q13.32
200995_at	6.469	5.878	-0.591	0.000666054	0.000481896	importin 7	IPO7	chr11p15.4
227722_at	6.362	5.771	-0.591	1.07464e-05	1.49529e-05	ribosomal protein S23	RPS23	chr5q14.2
228585_at	7.508	6.917	-0.591	0.00289696	0.00168337	ectonucleoside triphosphate diphosphohydrolase 1	ENTPD1	chr10q24
237864_at	5.628	5.037	-0.591	1.77032e-06	3.36193e-06	---	---	---
210949_s_at	9.704	9.113	-0.591	4.29444e-07	1.04383e-06	eukaryotic translation initiation factor 3, subunit C /// eukaryotic translation initiation factor 3, subunit C-like	EIF3C /// EIF3CL	chr16p11.2
214016_s_at	9.354	8.762	-0.592	8.88526e-08	2.92059e-07	splicing factor proline/glutamine-rich	SFPQ	chr1p34.3
222129_at	8.899	8.307	-0.592	3.16742e-10	2.85779e-09	family with sequence similarity 134, member A	FAM134A	chr2q35
210281_s_at	6.16	5.568	-0.592	7.77961e-06	1.1438e-05	zinc finger, MYM-type 2	ZMYM2	chr13q11-q12
213158_at	5.804	5.212	-0.592	0.00177123	0.00110862	zinc finger and BTB domain containing 20	ZBTB20	chr3q13.2
214092_x_at	8.566	7.974	-0.592	2.59356e-07	6.96751e-07	SURP and G-patch domain containing 2	SUGP2	chr19p12
222065_s_at	9.494	8.902	-0.592	1.02482e-08	4.87461e-08	flightless I actin binding protein	FLII	chr17p11.2
226131_s_at	13.17	12.578	-0.592	1.79128e-07	5.13328e-07	ribosomal protein S16	RPS16	chr19q13.1
203669_s_at	7.671	7.078	-0.593	7.20661e-09	3.6661e-08	diacylglycerol O-acyltransferase 1	DGAT1	chr8q24.3
207564_x_at	8.721	8.128	-0.593	0.000815655	0.000572352	O-linked N-acetylglucosamine (GlcNAc) transferase	OGT	chrXq13
212160_at	7.813	7.22	-0.593	0.000219109	0.000188378	exportin, tRNA	XPOT	chr12q14.2
212689_s_at	8.917	8.324	-0.593	2.89973e-06	5.06067e-06	lysine (K)-specific demethylase 3A	KDM3A	chr2p11.2
213868_s_at	5.831	5.238	-0.593	7.06612e-06	1.05636e-05	dehydrogenase/reductase (SDR family) member 7	DHRS7	chr14q23.1
215450_at	7.251	6.658	-0.593	0.00346851	0.0019672	small nuclear ribonucleoprotein polypeptide E	SNRPE	chr1q32
217873_at	10.364	9.771	-0.593	1.47858e-06	2.90726e-06	calcium binding protein 39	CAB39	chr2q37.1
222681_at	6.726	6.133	-0.593	0.000299202	0.000244463	protein O-glucosyltransferase 1	POGLUT1	chr3q13.33
227844_at	4.865	4.272	-0.593	2.49089e-06	4.46447e-06	formin like 3	FMNL3	chr12q13.12
232759_at	5.771	5.178	-0.593	0.000158817	0.000143346	---	---	---
244846_at	4.86	4.267	-0.593	1.88509e-06	3.54592e-06	---	---	---
203556_at	8.178	7.585	-0.593	1.83745e-07	5.23423e-07	zinc fingers and homeoboxes 2	ZHX2	chr8q24.13
202611_s_at	5.983	5.389	-0.594	2.62574e-05	3.15479e-05	mediator complex subunit 14	MED14	chrXp11.4
212145_at	7.805	7.211	-0.594	1.03756e-07	3.29188e-07	mitochondrial ribosomal protein S27	MRPS27	chr5q13.2
213039_at	10.503	9.909	-0.594	3.98742e-07	9.83874e-07	Rho/Rac guanine nucleotide exchange factor 18	ARHGEF18	chr19p13.3
224452_s_at	7.821	7.227	-0.594	1.75044e-05	2.24409e-05	family with sequence similarity 220, member A	FAM220A	chr7p22.1
225879_at	8.635	8.041	-0.594	3.4691e-07	8.8333e-07	TSEN54 tRNA splicing endonuclease subunit	TSEN54	chr17q25.1
230298_at	5.254	4.66	-0.594	0.000285683	0.000235266	metallo-beta-lactamase domain containing 2	MBLAC2	chr5q14.3
231989_s_at	7.318	6.724	-0.594	0.000130842	0.000122074	putative uncharacterized protein LOC641298 /// nuclear pore complex-interacting protein family member B5-like /// nuclear pore complex interacting protein family, member B3 /// nuclear pore complex interacting protein family, member B4 /// nuclear pore complex interacting protein family, member B5 /// SMG1 pseudogene 1 /// SMG1 pseudogene 3	LOC105369244 /// LOC105369248 /// NPIPB3 /// NPIPB4 /// NPIPB5 /// SMG1P1 /// SMG1P3	chr16p12.2
1552789_at	4.862	4.268	-0.594	2.52893e-06	4.50983e-06	SEC62 homolog, preprotein translocation factor	SEC62	chr3q26.2
230229_at	7.073	6.479	-0.594	0.000685373	0.0004935	discs, large homolog 1 (Drosophila)	DLG1	chr3q29
236951_at	7.892	7.298	-0.594	5.70436e-07	1.31692e-06	NSFL1 (p97) cofactor (p47)	NSFL1C	chr20p13
238812_at	7.258	6.664	-0.594	1.8576e-06	3.50271e-06	---	---	---
226970_at	9.014	8.419	-0.595	1.46713e-08	6.59855e-08	F-box protein 33	FBXO33	chr14q21.1
205511_at	5.801	5.206	-0.595	0.000456905	0.000349059	uncharacterized protein FLJ10038 /// GA binding protein transcription factor, beta subunit 1	FLJ10038 /// GABPB1	chr15q21.2
212326_at	7.034	6.439	-0.595	8.73253e-09	4.28143e-08	vacuolar protein sorting 13 homolog D (S. cerevisiae)	VPS13D	chr1p36.22
213650_at	6.869	6.274	-0.595	2.29469e-07	6.29427e-07	golgin A8 family, member A /// golgin A8 family, member B	GOLGA8A /// GOLGA8B	chr15q11.2 /// chr15q14
222478_at	8.324	7.729	-0.595	0.000363112	0.00028754	vacuolar protein sorting 36 homolog (S. cerevisiae)	VPS36	chr13q14.3
228282_at	6.406	5.811	-0.595	0.00249216	0.00148508	major facilitator superfamily domain containing 8	MFSD8	chr4q28.2
228925_at	4.683	4.088	-0.595	7.09239e-05	7.28836e-05	mitogen-activated protein kinase-activated protein kinase 5	MAPKAPK5	chr12q24.13
37652_at	8.28	7.685	-0.595	1.3066e-05	1.76002e-05	calcineurin binding protein 1	CABIN1	chr22q11.23
201751_at	8.182	7.587	-0.595	1.35591e-10	1.46252e-09	Josephin domain containing 1	JOSD1	chr22q13.1
212371_at	7.863	7.268	-0.595	0.000253756	0.000212909	desumoylating isopeptidase 2	DESI2	chr1q44
221589_s_at	5.517	4.922	-0.595	8.99971e-05	8.92951e-05	aldehyde dehydrogenase 6 family, member A1	ALDH6A1	chr14q24.3
221689_s_at	7.881	7.286	-0.595	7.82777e-06	1.14939e-05	phosphatidylinositol glycan anchor biosynthesis class P	PIGP	chr21q22.2
225003_at	9.083	8.488	-0.595	7.66558e-09	3.85583e-08	transmembrane protein 205	TMEM205	chr19p13.2
244868_at	5.772	5.177	-0.595	2.99053e-06	5.18383e-06	---	---	---
45572_s_at	9.704	9.109	-0.595	2.00107e-08	8.48312e-08	golgi-associated, gamma adaptin ear containing, ARF binding protein 1	GGA1	chr22q13.31
237497_at	5.302	4.706	-0.596	4.2281e-06	6.88324e-06	---	---	---
200058_s_at	9.599	9.003	-0.596	6.20379e-08	2.17068e-07	small nuclear ribonucleoprotein, U5 200kDa subunit	SNRNP200	chr2q11.2
200717_x_at	12.289	11.693	-0.596	0.00012207	0.00011521	ribosomal protein L7	RPL7	chr8q21.11
210758_at	5.796	5.2	-0.596	2.00938e-05	2.52019e-05	PC4 and SFRS1 interacting protein 1	PSIP1	chr9p22.3
225217_s_at	6.785	6.189	-0.596	1.60745e-06	3.10363e-06	bromodomain and PHD finger containing 3	BRPF3	chr6p21
227274_at	7.202	6.606	-0.596	9.95775e-06	1.40298e-05	synaptojanin 2 binding protein	SYNJ2BP	chr14q24.2
239067_s_at	6.824	6.228	-0.596	7.57484e-06	1.1182e-05	pannexin 2	PANX2	chr22q13.33
201922_at	9.747	9.15	-0.597	4.4734e-05	4.94942e-05	NSA2 ribosome biogenesis homolog	NSA2	chr5q13.3
212927_at	6.833	6.236	-0.597	0.000137287	0.00012672	structural maintenance of chromosomes 5	SMC5	chr9q21.12
213727_x_at	9.711	9.114	-0.597	9.7947e-09	4.6994e-08	metallophosphoesterase 1	MPPE1	chr18p11.21
225688_s_at	4.725	4.128	-0.597	0.000111423	0.00010682	pleckstrin homology-like domain, family B, member 2	PHLDB2	chr3q13.2
235692_at	7.638	7.041	-0.597	1.58918e-10	1.65442e-09	SH3-domain kinase binding protein 1	SH3KBP1	chrXp22.1-p21.3
202565_s_at	9.223	8.626	-0.597	4.5289e-05	4.99772e-05	supervillin	SVIL	chr10p11.2
214271_x_at	11.841	11.243	-0.598	3.99109e-06	6.56432e-06	ribosomal protein L12	RPL12	chr9q34
228535_at	5.928	5.33	-0.598	5.86355e-07	1.34803e-06	RAD1 checkpoint DNA exonuclease	RAD1	chr5p13.2
213996_at	6.331	5.733	-0.598	8.97963e-06	1.28819e-05	yippee like 1	YPEL1	chr22q11.2
229249_at	6.368	5.77	-0.598	1.59518e-05	2.07847e-05	glutamate rich 1	ERICH1	chr8p23.3
214582_at	5.895	5.296	-0.599	7.61548e-05	7.746e-05	phosphodiesterase 3B, cGMP-inhibited	PDE3B	chr11p15.1
220296_at	8.071	7.472	-0.599	4.45452e-09	2.48265e-08	---	---	---
1552343_s_at	6.771	6.172	-0.599	1.91936e-05	2.42254e-05	phosphodiesterase 7A	PDE7A	chr8q13
200990_at	7.936	7.337	-0.599	3.05958e-05	3.59534e-05	tripartite motif containing 28	TRIM28	chr19q13.4
203856_at	7.014	6.415	-0.599	0.000479799	0.000363453	vaccinia related kinase 1	VRK1	chr14q32
205255_x_at	10.586	9.987	-0.599	1.72688e-07	4.9926e-07	transcription factor 7 (T-cell specific, HMG-box)	TCF7	chr5q31.1
220864_s_at	9.76	9.161	-0.599	1.58356e-07	4.64188e-07	NADH dehydrogenase (ubiquinone) 1 alpha subcomplex, 13	NDUFA13	chr19p13.2
232709_at	5.019	4.42	-0.599	4.48692e-08	1.67277e-07	---	---	---
235028_at	9.41	8.811	-0.599	0.00137983	0.000896244	---	---	---
236717_at	5.996	5.397	-0.599	6.80299e-09	3.49588e-08	family with sequence similarity 179, member A	FAM179A	chr2p23.2
240440_at	9.432	8.833	-0.599	2.25797e-06	4.1201e-06	N-acetylneuraminate pyruvate lyase (dihydrodipicolinate synthase)	NPL	chr1q25
200092_s_at	12.92	12.32	-0.6	5.93124e-06	9.12569e-06	ribosomal protein L37	RPL37	chr5p13
201623_s_at	9.916	9.316	-0.6	3.57122e-06	5.99202e-06	aspartyl-tRNA synthetase	DARS	chr2q21.3
221973_at	6.039	5.439	-0.6	6.33294e-06	9.62809e-06	uncharacterized LOC100506076 /// uncharacterized LOC100506123	LOC100506076 /// LOC100506123	chr2q11 /// chr2q11.2
222392_x_at	5.217	4.617	-0.6	0.000255747	0.000214378	PERP, TP53 apoptosis effector	PERP	chr6q24
228170_at	7.754	7.154	-0.6	0.00437617	0.00239927	oligodendrocyte transcription factor 1	OLIG1	chr21q22.11
231714_s_at	8.116	7.516	-0.6	1.24407e-08	5.76083e-08	adaptor-related protein complex 4, beta 1 subunit	AP4B1	chr1p13.2
232210_at	8.62	8.02	-0.6	0.0016643	0.00105234	---	---	---
209307_at	6.892	6.292	-0.6	0.000602312	0.000441688	SWAP switching B-cell complex 70kDa subunit	SWAP70	chr11p15
220925_at	6.522	5.922	-0.6	4.49719e-05	4.96961e-05	N(alpha)-acetyltransferase 35, NatC auxiliary subunit	NAA35	chr9q21.33
235459_at	6.163	5.563	-0.6	7.27338e-07	1.61164e-06	ring finger protein 41, E3 ubiquitin protein ligase	RNF41	chr12q13.13
201724_s_at	8.155	7.554	-0.601	3.21122e-05	3.74714e-05	polypeptide N-acetylgalactosaminyltransferase 1	GALNT1	chr18q12.1
1559025_at	5.519	4.918	-0.601	0.000100477	9.78955e-05	septin 9	2019-09-09	chr17q25
201671_x_at	7.356	6.755	-0.601	0.000188403	0.000166121	ubiquitin specific peptidase 14 (tRNA-guanine transglycosylase)	USP14	chr18p11.32
204672_s_at	4.632	4.031	-0.601	1.54252e-08	6.88504e-08	ankyrin repeat domain 6	ANKRD6	chr6q15
220507_s_at	5.511	4.91	-0.601	4.70588e-07	1.12366e-06	ureidopropionase, beta	UPB1	chr22q11.2
203789_s_at	5.177	4.575	-0.602	0.000180935	0.000160701	sema domain, immunoglobulin domain (Ig), short basic domain, secreted, (semaphorin) 3C	SEMA3C	chr7q21-q31
1556932_at	5.232	4.63	-0.602	3.59659e-07	9.08374e-07	---	---	---
1559467_at	7.899	7.297	-0.602	1.43101e-08	6.47355e-08	---	---	---
201968_s_at	9.504	8.902	-0.602	1.87772e-09	1.22186e-08	phosphoglucomutase 1	PGM1	chr1p31
205851_at	7.17	6.568	-0.602	3.90766e-11	5.25875e-10	NME/NM23 nucleoside diphosphate kinase 6	NME6	chr3p21
212066_s_at	9.365	8.763	-0.602	3.11447e-09	1.85391e-08	ubiquitin specific peptidase 34	USP34	chr2p15
212375_at	6.929	6.327	-0.602	1.60132e-06	3.09538e-06	E1A binding protein p400	EP400	chr12q24.33
213849_s_at	6.12	5.518	-0.602	9.93618e-06	1.40021e-05	protein phosphatase 2, regulatory subunit B, beta	PPP2R2B	chr5q32
218739_at	8.722	8.12	-0.602	3.25076e-06	5.54776e-06	abhydrolase domain containing 5	ABHD5	chr3p21
223171_at	7.86	7.258	-0.602	1.69543e-10	1.72742e-09	dymeclin	DYM	chr18q21.1
229144_at	6.056	5.454	-0.602	1.69147e-08	7.41605e-08	kazrin, periplakin interacting protein	KAZN	chr1p36.21
233223_at	7.141	6.539	-0.602	3.11187e-05	3.64512e-05	---	---	---
74694_s_at	7.253	6.651	-0.602	2.95322e-05	3.48124e-05	rabaptin, RAB GTPase binding effector protein 2	RABEP2	chr16p11.2
208072_s_at	9.317	8.714	-0.603	1.22031e-09	8.72697e-09	diacylglycerol kinase, delta 130kDa	DGKD	chr2q37.1
219968_at	7.093	6.49	-0.603	5.47564e-09	2.92015e-08	zinc finger protein 589	ZNF589	chr3p21
230285_at	6.201	5.598	-0.603	0.000289151	0.00023763	small VCP/p97-interacting protein	SVIP	chr11p14.2
244031_at	5.183	4.58	-0.603	0.000685396	0.0004935	---	---	---
35626_at	8.356	7.753	-0.603	7.07455e-10	5.54588e-09	N-sulfoglucosamine sulfohydrolase	SGSH	chr17q25.3
211955_at	7.049	6.446	-0.603	1.40057e-06	2.7767e-06	importin 5	IPO5	chr13q32.2
220768_s_at	6.586	5.983	-0.603	0.00104142	0.000704449	casein kinase 1, gamma 3	CSNK1G3	chr5q23
209375_at	8.675	8.072	-0.603	5.17939e-10	4.26534e-09	xeroderma pigmentosum, complementation group C	XPC	chr3p25.1
202931_x_at	8.962	8.358	-0.604	5.98537e-07	1.36945e-06	bridging integrator 1	BIN1	chr2q14
217788_s_at	8.472	7.868	-0.604	2.6603e-10	2.48463e-09	polypeptide N-acetylgalactosaminyltransferase 2	GALNT2	chr1q41-q42
225562_at	8.091	7.487	-0.604	2.90798e-07	7.67141e-07	RAS p21 protein activator 3	RASA3	chr13q34
226156_at	7.951	7.347	-0.604	7.70589e-11	9.21222e-10	v-akt murine thymoma viral oncogene homolog 2	AKT2	chr19q13.1-q13.2
201952_at	7.662	7.058	-0.604	0.000295177	0.000241641	activated leukocyte cell adhesion molecule	ALCAM	chr3q13.1
206958_s_at	6.595	5.991	-0.604	0.000192998	0.000169422	UPF3 regulator of nonsense transcripts homolog A (yeast)	UPF3A	chr13q34
222587_s_at	6.508	5.904	-0.604	1.59722e-05	2.07962e-05	polypeptide N-acetylgalactosaminyltransferase 7	GALNT7	chr4q31.1
229211_at	7.366	6.762	-0.604	1.35768e-07	4.09867e-07	dual specificity phosphatase 28	DUSP28	chr2q37.3
229322_at	7.662	7.058	-0.604	0.00050697	0.000381217	protein phosphatase 2, regulatory subunit B', epsilon isoform	PPP2R5E	chr14q23.1
232322_x_at	6.979	6.375	-0.604	2.91994e-07	7.69447e-07	StAR-related lipid transfer domain containing 10	STARD10	chr11q13
241370_at	7.634	7.03	-0.604	3.48156e-05	4.0175e-05	uncharacterized LOC286052 /// transmembrane protein 65	LOC286052 /// TMEM65	chr8q24.13
225266_at	9.11	8.505	-0.605	3.53248e-08	1.36814e-07	zinc finger protein 652	ZNF652	chr17q21.32
1554771_at	6.291	5.686	-0.605	6.2276e-06	9.49006e-06	---	---	---
1557065_at	6.362	5.757	-0.605	1.50596e-06	2.94735e-06	YLP motif containing 1	YLPM1	chr14q24.3
209042_s_at	8.856	8.251	-0.605	5.064e-05	5.48432e-05	ubiquitin conjugating enzyme E2G 2	UBE2G2	chr21q22.3
225232_at	8.369	7.764	-0.605	2.33708e-05	2.85727e-05	myotubularin related protein 12	MTMR12	chr5p13.3
235626_at	8.061	7.456	-0.605	1.92629e-07	5.43733e-07	calcium/calmodulin-dependent protein kinase ID	CAMK1D	chr10p13
1553311_at	4.142	3.536	-0.606	4.80165e-05	5.24944e-05	chromosome 20 open reading frame 197	C20orf197	chr20q13.33
1564424_at	5.837	5.231	-0.606	1.74315e-06	3.32184e-06	uncharacterized LOC105379752	LOC105379752	---
202066_at	8.828	8.222	-0.606	1.96813e-08	8.37587e-08	protein tyrosine phosphatase, receptor type, f polypeptide (PTPRF), interacting protein (liprin), alpha 1	PPFIA1	chr11q13.3
202146_at	8.759	8.153	-0.606	0.000465799	0.000354796	interferon-related developmental regulator 1	IFRD1	chr7q31.1
202241_at	8.859	8.253	-0.606	1.01135e-05	1.42324e-05	tribbles pseudokinase 1	TRIB1	chr8q24.13
205565_s_at	6.402	5.796	-0.606	1.72216e-06	3.29233e-06	frataxin	FXN	chr9q21.11
221751_at	7.469	6.863	-0.606	0.00274158	0.00160649	pantothenate kinase 3	PANK3	chr5q34
222409_at	9.586	8.98	-0.606	9.7892e-09	4.6994e-08	coronin, actin binding protein, 1C	CORO1C	chr12q24.1
224812_at	6.013	5.407	-0.606	8.14309e-05	8.20471e-05	3-hydroxyisobutyrate dehydrogenase	HIBADH	chr7p15.2
232493_at	5.449	4.843	-0.606	3.15631e-08	1.24806e-07	---	---	---
212329_at	8.361	7.755	-0.606	5.68421e-10	4.64904e-09	SREBF chaperone	SCAP	chr3p21.31
228173_at	8.044	7.438	-0.606	1.09313e-07	3.42696e-07	GNAS complex locus	GNAS	chr20q13.3
204206_at	8.795	8.188	-0.607	2.14075e-10	2.08349e-09	MAX network transcriptional repressor	MNT	chr17p13.3
212239_at	6.887	6.28	-0.607	1.83006e-05	2.32827e-05	phosphoinositide-3-kinase, regulatory subunit 1 (alpha)	PIK3R1	chr5q13.1
203088_at	6.088	5.481	-0.607	3.8083e-06	6.31391e-06	fibulin 5	FBLN5	chr14q32.1
210282_at	5.339	4.732	-0.607	0.000106233	0.000102571	zinc finger, MYM-type 2	ZMYM2	chr13q11-q12
215586_at	4.832	4.225	-0.607	0.00109291	0.000734088	---	---	---
226532_at	6.83	6.223	-0.607	4.94109e-06	7.83071e-06	---	---	---
227369_at	7.008	6.401	-0.607	9.85267e-05	9.64408e-05	SERPINE1 mRNA binding protein 1	SERBP1	chr1p31
229028_s_at	6.282	5.675	-0.607	3.95611e-07	9.7783e-07	ADP-ribosylation factor like GTPase 17A /// ADP-ribosylation factor like GTPase 17B /// ADP-ribosylation factor-like protein 17 /// ADP-ribosylation factor-like protein 17	ARL17A /// ARL17B /// LOC100294341 /// LOC100996709	chr17q21.31
212319_at	7.327	6.719	-0.608	1.37984e-08	6.27362e-08	small G protein signaling modulator 2	SGSM2	chr17p13.3
230099_at	8.35	7.742	-0.608	8.81023e-07	1.88922e-06	---	---	---
225740_x_at	10.028	9.42	-0.608	2.84852e-07	7.53815e-07	MDM4, p53 regulator	MDM4	chr1q32
1552330_at	5.695	5.086	-0.609	1.89686e-06	3.56268e-06	CENPB DNA-binding domain containing 1	CENPBD1	chr16q24.3
1554251_at	6.65	6.041	-0.609	0.000163807	0.000147312	heterochromatin protein 1, binding protein 3	HP1BP3	chr1p36.12
1558236_at	7.401	6.792	-0.609	2.51788e-06	4.49552e-06	down-regulator of transcription 1	DR1	chr1p22.1
205596_s_at	7.752	7.143	-0.609	1.01442e-05	1.42728e-05	SMAD specific E3 ubiquitin protein ligase 2	SMURF2	chr17q22-q23
212638_s_at	8.394	7.785	-0.609	6.29689e-05	6.5985e-05	WW domain containing E3 ubiquitin protein ligase 1	WWP1	chr8q21
212818_s_at	7.373	6.764	-0.609	4.54368e-09	2.51613e-08	ankyrin repeat and SOCS box containing 1	ASB1	chr2q37
222668_at	5.645	5.036	-0.609	1.42961e-07	4.27445e-07	potassium channel tetramerization domain containing 15	KCTD15	chr19q13.11
224057_s_at	7.461	6.852	-0.609	2.30956e-10	2.21769e-09	THAP domain containing 4	THAP4	chr2q37.3
225017_at	6.901	6.292	-0.609	0.00249604	0.0014869	coiled-coil domain containing 14	CCDC14	chr3q21.1
225086_at	7.118	6.509	-0.609	0.000311162	0.000252896	family with sequence similarity 98, member B	FAM98B	chr15q14
225432_s_at	5.692	5.083	-0.609	2.07163e-07	5.76622e-07	CSRP2 binding protein	CSRP2BP	chr20p11.23
232681_at	6.65	6.041	-0.609	0.000151956	0.000137987	---	---	---
236428_at	5.463	4.854	-0.609	1.68416e-05	2.17309e-05	---	---	---
221080_s_at	8.255	7.646	-0.609	2.43357e-06	4.37705e-06	DENN/MADD domain containing 1C	DENND1C	chr19p13.3
209791_at	9.429	8.819	-0.61	5.97886e-05	6.31506e-05	peptidyl arginine deiminase, type II	PADI2	chr1p36.13
219104_at	7.627	7.017	-0.61	1.4932e-08	6.69407e-08	ring finger protein 141	RNF141	chr11p15.4
226392_at	8.757	8.147	-0.61	0.00221138	0.00134184	RAS p21 protein activator 2	RASA2	chr3q22-q23
203678_at	6.823	6.213	-0.61	7.19807e-07	1.59897e-06	FANCD2/FANCI-associated nuclease 1	FAN1	chr15q13.2-q13.3
216237_s_at	8.009	7.399	-0.61	7.98467e-08	2.6631e-07	minichromosome maintenance complex component 5	MCM5	chr22q13.1
208904_s_at	12.608	11.998	-0.61	1.65256e-07	4.80682e-07	ribosomal protein S28	RPS28	chr19p13.2
203913_s_at	4.272	3.661	-0.611	4.907e-05	5.34182e-05	hydroxyprostaglandin dehydrogenase 15-(NAD)	HPGD	chr4q34-q35
231406_at	8.578	7.967	-0.611	5.52754e-08	1.98738e-07	ORAI calcium release-activated calcium modulator 2	ORAI2	chr7q22.1
231798_at	4.359	3.748	-0.611	4.85401e-06	7.70973e-06	noggin	NOG	chr17q22
201612_at	9.784	9.173	-0.611	1.57009e-09	1.06547e-08	aldehyde dehydrogenase 9 family, member A1	ALDH9A1	chr1q23.1
221658_s_at	5.985	5.374	-0.611	1.46649e-05	1.93719e-05	interleukin 21 receptor	IL21R	chr16p11
228077_at	8.204	7.593	-0.611	3.33439e-06	5.67017e-06	methylthioribose-1-phosphate isomerase 1	MRI1	chr19p13.2
201458_s_at	8.008	7.396	-0.612	0.00207215	0.00126852	BUB3 mitotic checkpoint protein	BUB3	chr10q26
219267_at	8.386	7.774	-0.612	3.0937e-09	1.84308e-08	glycolipid transfer protein	GLTP	chr12q24.11
225917_at	8.296	7.684	-0.612	4.04759e-05	4.55274e-05	activating transcription factor 7 interacting protein	ATF7IP	chr12p13.1
1555613_a_at	7.626	7.014	-0.612	0.00141314	0.000913587	zeta chain of T cell receptor associated protein kinase 70kDa	ZAP70	chr2q12
1555759_a_at	11.336	10.724	-0.612	6.81318e-05	7.05297e-05	chemokine (C-C motif) ligand 5	CCL5	chr17q12
202414_at	8.038	7.426	-0.612	1.56316e-06	3.03939e-06	excision repair cross-complementation group 5	ERCC5	chr13q33
209333_at	7.66	7.048	-0.612	7.25291e-08	2.46093e-07	unc-51 like autophagy activating kinase 1	ULK1	chr12q24.3
225012_at	7.107	6.495	-0.612	4.36892e-07	1.0605e-06	high density lipoprotein binding protein	HDLBP	chr2q37.3
228722_at	6.732	6.12	-0.612	4.15446e-06	6.7803e-06	protein arginine methyltransferase 2	PRMT2	chr21q22.3
243539_at	5.742	5.13	-0.612	8.09863e-05	8.16565e-05	KIAA1841	KIAA1841	chr2q14
37860_at	7.202	6.59	-0.612	5.3255e-06	8.3477e-06	zinc finger protein 337	ZNF337	chr20p11.1
205230_at	6.162	5.549	-0.613	0.0101454	0.00488237	rabphilin 3A	RPH3A	chr12q24.13
205283_at	5.376	4.763	-0.613	1.67523e-07	4.86091e-07	fukutin	FKTN	chr9q31.2
206848_at	7.32	6.707	-0.613	6.96597e-06	1.04335e-05	COX20 cytochrome c oxidase assembly factor	COX20	chr1q44
211685_s_at	6.593	5.98	-0.613	9.09494e-07	1.93581e-06	neurocalcin delta	NCALD	chr8q22.2
213218_at	6.247	5.634	-0.613	1.2406e-05	1.68951e-05	zinc finger and SCAN domain containing 26	ZSCAN26	chr6p21.31
216250_s_at	10.033	9.42	-0.613	4.77575e-07	1.13882e-06	leupaxin	LPXN	chr11q12.1
226747_at	5.976	5.363	-0.613	0.000315703	0.000255962	thioredoxin domain containing 16	TXNDC16	chr14q22.1
231836_at	6.14	5.527	-0.613	2.86188e-05	3.39122e-05	HKR1, GLI-Kruppel zinc finger family member	HKR1	chr19q13.12
242818_x_at	4.825	4.212	-0.613	2.62944e-07	7.03492e-07	Yip1 domain family member 4	YIPF4	chr2p22.3
235816_s_at	8.027	7.413	-0.614	3.55725e-05	4.08971e-05	ral guanine nucleotide dissociation stimulator-like 4	RGL4	chr22q11.23
1552546_a_at	4.678	4.064	-0.614	5.34532e-06	8.3682e-06	leucine zipper-EF-hand containing transmembrane protein 2	LETM2	chr8p11.23
1553111_a_at	4.812	4.198	-0.614	6.62821e-08	2.29266e-07	kelch repeat and BTB (POZ) domain containing 6	KBTBD6	chr13q14.11
202056_at	7.686	7.072	-0.614	8.33565e-07	1.80472e-06	karyopherin alpha 1	KPNA1	chr3q21
203450_at	7.036	6.422	-0.614	5.85627e-11	7.27361e-10	chibby homolog 1 (Drosophila)	CBY1	chr22q12
205097_at	6.093	5.479	-0.614	6.03658e-05	6.36477e-05	solute carrier family 26 (anion exchanger), member 2	SLC26A2	chr5q31-q34
212959_s_at	7.986	7.372	-0.614	0.000368212	0.00029097	N-acetylglucosamine-1-phosphate transferase, alpha and beta subunits	GNPTAB	chr12q23.2
223738_s_at	7.636	7.022	-0.614	7.06149e-10	5.5417e-09	phosphoglucomutase 2	PGM2	chr4p14
236488_s_at	8.392	7.778	-0.614	6.9003e-06	1.03524e-05	---	---	---
240478_at	7.2	6.586	-0.614	3.56036e-09	2.06284e-08	---	---	---
200095_x_at	12.345	11.731	-0.614	5.12263e-06	8.06333e-06	ribosomal protein S10 /// RPS10-NUDT3 readthrough /// ribosomal protein S10 pseudogene 19	RPS10 /// RPS10-NUDT3 /// RPS10P19	chr11p11.2 /// chr6p21 /// chr6p21.31
218135_at	8.396	7.782	-0.614	0.00010666	0.000102913	ERGIC and golgi 2	ERGIC2	chr12p11.22
224993_at	8.595	7.981	-0.614	1.13133e-09	8.19686e-09	myeloid/lymphoid or mixed-lineage leukemia; translocated to, 1	MLLT1	chr19p13.3
227095_at	8.066	7.452	-0.614	1.05896e-06	2.2004e-06	leptin receptor overlapping transcript	LEPROT	chr1p31.3
201112_s_at	8.421	7.806	-0.615	2.68232e-06	4.73599e-06	CSE1 chromosome segregation 1-like (yeast)	CSE1L	chr20q13
225910_at	8.565	7.95	-0.615	1.08451e-05	1.50727e-05	helicase with zinc finger	HELZ	chr17q24.2
225959_s_at	6.435	5.82	-0.615	7.03734e-09	3.59018e-08	zinc and ring finger 1, E3 ubiquitin protein ligase	ZNRF1	chr16q23.1
1557987_at	9.994	9.379	-0.615	0.000110958	0.000106459	---	---	---
201677_at	6.508	5.893	-0.615	1.38917e-06	2.75792e-06	5-hydroxymethylcytosine (hmC) binding, ES cell-specific	HMCES	chr3q21.3
202457_s_at	9.282	8.666	-0.616	6.14291e-06	9.39293e-06	protein phosphatase 3, catalytic subunit, alpha isozyme	PPP3CA	chr4q24
204059_s_at	4.962	4.346	-0.616	2.66687e-08	1.08135e-07	malic enzyme 1, NADP(+)-dependent, cytosolic	ME1	chr6q12
204102_s_at	11.81	11.194	-0.616	1.0256e-06	2.14287e-06	eukaryotic translation elongation factor 2	EEF2	chr19p13.3
220960_x_at	10.807	10.191	-0.616	2.81255e-05	3.34228e-05	ribosomal protein L22	RPL22	chr1p36.31
227762_at	7.199	6.583	-0.616	1.81385e-05	2.31174e-05	---	---	---
232489_at	5.699	5.083	-0.616	6.01806e-05	6.34992e-05	tRNA methyltransferase 13 homolog (S. cerevisiae)	TRMT13	chr1p21.2
233893_s_at	8.466	7.85	-0.616	8.82153e-07	1.89108e-06	UV stimulated scaffold protein A	UVSSA	chr4p16.3
240263_at	6.305	5.689	-0.616	4.68201e-07	1.11907e-06	---	---	---
242617_at	7.928	7.312	-0.616	8.92308e-08	2.92925e-07	transmembrane p24 trafficking protein family member 8	TMED8	chr14q24.3
200962_at	7.309	6.693	-0.616	0.000206885	0.000179569	ribosomal protein L31	RPL31	chr2q11.2
233360_at	6.128	5.512	-0.616	1.58278e-08	7.0254e-08	ubiquitin conjugating enzyme E2I	UBE2I	chr16p13.3
238769_at	6.12	5.504	-0.616	4.29341e-05	4.78199e-05	---	---	---
204153_s_at	9.052	8.435	-0.617	3.54732e-07	8.99006e-07	MFNG O-fucosylpeptide 3-beta-N-acetylglucosaminyltransferase	MFNG	chr22q12
211458_s_at	8.911	8.294	-0.617	4.41835e-10	3.77738e-09	GABA(A) receptor-associated protein like 1 /// GABA(A) receptors associated protein like 3, pseudogene	GABARAPL1 /// GABARAPL3	chr12p13.2 /// chr15q26.1
212496_s_at	10.203	9.586	-0.617	1.32583e-11	2.20192e-10	lysine (K)-specific demethylase 4B	KDM4B	chr19p13.3
220035_at	7.867	7.25	-0.617	4.79461e-07	1.14218e-06	nucleoporin 210kDa	NUP210	chr3p25.1
224836_at	7.293	6.676	-0.617	3.08147e-06	5.31577e-06	tumor protein p53 inducible nuclear protein 2	TP53INP2	chr20q11.22
224959_at	7.143	6.526	-0.617	0.00413011	0.00228233	solute carrier family 26 (anion exchanger), member 2	SLC26A2	chr5q31-q34
229173_at	5.428	4.811	-0.617	5.09701e-07	1.1983e-06	KIAA1715	KIAA1715	chr2q31
244043_at	5.412	4.795	-0.617	0.00012604	0.000118226	transcription factor Dp-2 (E2F dimerization partner 2)	TFDP2	chr3q23
203427_at	6.709	6.091	-0.618	0.00295168	0.00171239	anti-silencing function 1A histone chaperone	ASF1A	chr6q22.31
208807_s_at	8.058	7.44	-0.618	2.6576e-08	1.0782e-07	chromodomain helicase DNA binding protein 3	CHD3	chr17p13.1
218432_at	6.494	5.876	-0.618	0.00374778	0.00209969	F-box protein 3	FBXO3	chr11p13
219378_at	7.357	6.739	-0.618	6.64948e-05	6.91243e-05	N(alpha)-acetyltransferase 16, NatA auxiliary subunit	NAA16	chr13q14.11
224603_at	9.55	8.932	-0.618	3.28733e-08	1.29132e-07	small nucleolar RNA host gene 16	SNHG16	---
1568815_a_at	6.382	5.763	-0.619	3.91819e-06	6.46976e-06	DEAD (Asp-Glu-Ala-Asp) box polypeptide 50	DDX50	chr10q22.1
205883_at	6.114	5.495	-0.619	0.000126853	0.000118941	zinc finger and BTB domain containing 16	ZBTB16	chr11q23.1
206237_s_at	6.177	5.558	-0.619	8.16215e-07	1.77466e-06	neuregulin 1	NRG1	chr8p12
210916_s_at	7.681	7.062	-0.619	0.000119158	0.000112936	CD44 molecule (Indian blood group)	CD44	chr11p13
223099_s_at	7.433	6.814	-0.619	3.12987e-06	5.3747e-06	lon peptidase 2, peroxisomal	LONP2	chr16q12.1
225483_at	7.886	7.267	-0.619	4.42204e-09	2.46838e-08	VPS26 retromer complex component B	VPS26B	chr11q25
226074_at	8.875	8.256	-0.619	1.84834e-07	5.25103e-07	protein phosphatase, Mg2+/Mn2+ dependent, 1M	PPM1M	chr3p21.2
227410_at	6.669	6.05	-0.619	2.05118e-07	5.7204e-07	family with sequence similarity 43, member A	FAM43A	chr3q29
223006_s_at	8.989	8.37	-0.619	1.07601e-06	2.22936e-06	transmembrane protein 245	TMEM245	chr9q31
209583_s_at	4.637	4.017	-0.62	0.000276947	0.000229283	CD200 molecule	CD200	chr3q13.2
212433_x_at	12.417	11.797	-0.62	9.17725e-08	2.99956e-07	ribosomal protein S2	RPS2	chr16p13.3
221495_s_at	10.04	9.42	-0.62	1.59979e-06	3.09384e-06	transcription factor 25 (basic helix-loop-helix)	TCF25	chr16q24.3
223358_s_at	8.722	8.102	-0.62	0.000352135	0.000280272	phosphodiesterase 7A	PDE7A	chr8q13
1562698_x_at	7.819	7.199	-0.62	8.65638e-06	1.25234e-05	uncharacterized LOC339988	LOC339988	chr4p16.1
200994_at	7.755	7.135	-0.62	2.10846e-05	2.62155e-05	importin 7	IPO7	chr11p15.4
201737_s_at	8.205	7.585	-0.62	7.56373e-06	1.11725e-05	membrane associated ring finger 6	2019-03-06	chr5p15.2
203675_at	6.476	5.856	-0.62	0.00360885	0.00203505	nucleobindin 2	NUCB2	chr11p15.1
218882_s_at	6.361	5.741	-0.62	0.000484074	0.000366072	WD repeat domain 3	WDR3	chr1p12
242518_at	5.472	4.852	-0.62	0.00217643	0.00132254	RAD51 antisense RNA 1 (head to head)	RAD51-AS1	chr15q15.1
242989_at	5.207	4.587	-0.62	1.80981e-06	3.42974e-06	striatin, calmodulin binding protein	STRN	chr2p22.2
244474_at	7.08	6.46	-0.62	1.4517e-08	6.54483e-08	---	---	---
1557512_at	5.658	5.037	-0.621	3.49798e-05	4.03256e-05	---	---	---
202979_s_at	5.661	5.04	-0.621	0.00242343	0.00145076	CREB/ATF bZIP transcription factor	CREBZF	chr11q14
208914_at	7.295	6.674	-0.621	9.21947e-08	3.00865e-07	golgi-associated, gamma adaptin ear containing, ARF binding protein 2	GGA2	chr16p12
213701_at	6.088	5.467	-0.621	0.00328997	0.00188164	chromosome 12 open reading frame 29	C12orf29	chr12q21.32
218019_s_at	8.149	7.528	-0.621	3.23591e-09	1.91035e-08	uncharacterized protein C21orf124 /// pyridoxal (pyridoxine, vitamin B6) kinase	LOC105372824 /// PDXK	chr21q22.3
226430_at	10.371	9.75	-0.621	1.10648e-07	3.46274e-07	RELT-like 1	RELL1	chr4p14
239450_at	5.71	5.089	-0.621	1.74016e-08	7.59705e-08	NDUFV2 antisense RNA 1	NDUFV2-AS1	chr18p11.22
240172_at	6.117	5.496	-0.621	4.14474e-07	1.01363e-06	ERGIC and golgi 2	ERGIC2	chr12p11.22
202561_at	6.678	6.056	-0.622	3.76601e-06	6.25843e-06	tankyrase, TRF1-interacting ankyrin-related ADP-ribose polymerase	TNKS	chr8p23.1
205176_s_at	6.047	5.425	-0.622	0.000166933	0.000149824	integrin beta 3 binding protein (beta3-endonexin)	ITGB3BP	chr1p31.3
209605_at	8.866	8.244	-0.622	3.53804e-09	2.05429e-08	thiosulfate sulfurtransferase (rhodanese)	TST	chr22q13.1
218865_at	8.987	8.365	-0.622	7.82382e-07	1.71461e-06	mitochondrial amidoxime reducing component 1	2019-03-01	chr1q41
227593_at	7.345	6.723	-0.622	1.08454e-07	3.40749e-07	uncharacterized LOC729614	FLJ37453	chr1p36.21
228826_at	7.504	6.882	-0.622	2.92821e-06	5.10027e-06	BZRAP1 antisense RNA 1	BZRAP1-AS1	---
239811_at	9.232	8.61	-0.622	3.15265e-06	5.40606e-06	---	---	---
218919_at	6.382	5.759	-0.623	0.000347159	0.000277143	zinc finger, AN1-type domain 1	ZFAND1	chr8q21.13
224060_s_at	5.821	5.198	-0.623	5.30062e-06	8.31416e-06	diphthamide biosynthesis 5	DPH5	chr1p21.2
227020_at	8.83	8.207	-0.623	1.97461e-06	3.68461e-06	yippee like 2	YPEL2	chr17q22
1556467_at	5.323	4.7	-0.623	2.38766e-07	6.50903e-07	zinc finger protein 80	ZNF80	chr3q13.3
227867_at	7.208	6.585	-0.623	2.767e-05	3.29744e-05	TraB domain containing 2A	TRABD2A	chr2p11.2
235171_at	5.081	4.458	-0.623	2.0692e-05	2.57989e-05	uncharacterized LOC100505501	LOC100505501	---
204334_at	9.066	8.443	-0.623	3.16113e-09	1.87637e-08	Kruppel-like factor 7 (ubiquitous)	KLF7	chr2q32
224581_s_at	8.502	7.879	-0.623	1.57732e-05	2.06007e-05	nuclear casein kinase and cyclin-dependent kinase substrate 1	NUCKS1	chr1q32.1
206039_at	6.173	5.549	-0.624	9.00524e-06	1.29161e-05	RAB33A, member RAS oncogene family	RAB33A	chrXq26.1
212413_at	6.983	6.359	-0.624	1.39896e-06	2.77504e-06	septin 6	2019-09-06	chrXq24
212991_at	7.395	6.771	-0.624	5.70959e-10	4.65917e-09	F-box protein 9	FBXO9	chr6p12.3-p11.2
211902_x_at	9.507	8.883	-0.624	0.000572979	0.000423439	YME1-like 1 ATPase	YME1L1	chr10p14
204976_s_at	7.594	6.969	-0.625	1.24032e-05	1.68951e-05	Alport syndrome, mental retardation, midface hypoplasia and elliptocytosis chromosomal region gene 1	AMMECR1	chrXq22.3
206437_at	9.743	9.117	-0.626	7.76074e-12	1.45344e-10	sphingosine-1-phosphate receptor 4	S1PR4	chr19p13.3
217902_s_at	6.018	5.392	-0.626	4.30868e-06	6.99537e-06	HECT and RLD domain containing E3 ubiquitin protein ligase 2	HERC2	chr15q13
218477_at	6.457	5.831	-0.626	0.000272372	0.000226095	transmembrane protein 14A	TMEM14A	chr6p12.2
239635_at	7.241	6.615	-0.626	5.16418e-07	1.21099e-06	RNA binding motif protein 14	RBM14	chr11q13.2
224734_at	7.445	6.819	-0.626	7.55858e-05	7.70342e-05	high mobility group box 1	HMGB1	chr13q12
235435_at	7.319	6.693	-0.626	1.5236e-05	2.0034e-05	aminoadipate-semialdehyde dehydrogenase	AASDH	chr4q12
244482_at	5.033	4.407	-0.626	0.000291722	0.000239305	---	---	---
238668_at	9.196	8.569	-0.627	6.75544e-07	1.51377e-06	NCK-associated protein 1-like	NCKAP1L	chr12q13.1
208488_s_at	7.25	6.623	-0.627	0.000396761	0.000309886	complement component (3b/4b) receptor 1 (Knops blood group)	CR1	chr1q32
219487_at	4.931	4.304	-0.627	0.000633398	0.000461161	Bardet-Biedl syndrome 10	BBS10	chr12q21.2
224576_at	7.428	6.801	-0.627	7.98912e-05	8.0711e-05	endoplasmic reticulum-golgi intermediate compartment 1	ERGIC1	chr5q35.1
231502_at	5.168	4.541	-0.627	5.09125e-07	1.19773e-06	---	---	---
212482_at	8.316	7.689	-0.627	6.01481e-12	1.19255e-10	required for meiotic nuclear division 5 homolog A	RMND5A	chr2p11.2
242879_x_at	6.062	5.435	-0.627	2.05085e-05	2.56146e-05	v-akt murine thymoma viral oncogene homolog 3	AKT3	chr1q44
1554464_a_at	7.193	6.565	-0.628	0.00107036	0.000721368	cartilage associated protein	CRTAP	chr3p22.3
226502_at	7.302	6.674	-0.628	0.000237384	0.000201506	ELMO/CED-12 domain containing 2	ELMOD2	chr4q31.1
1557238_s_at	5.571	4.943	-0.628	1.09186e-06	2.2557e-06	---	---	---
202227_s_at	8.751	8.123	-0.628	1.99885e-10	1.96944e-09	bromodomain containing 8	BRD8	chr5q31
202892_at	6.777	6.149	-0.628	0.000131159	0.00012226	cell division cycle 23	CDC23	chr5q31
205510_s_at	6.321	5.693	-0.628	2.01747e-05	2.52814e-05	uncharacterized protein FLJ10038 /// GA binding protein transcription factor, beta subunit 1	FLJ10038 /// GABPB1	chr15q21.2
210201_x_at	9.064	8.436	-0.628	4.17093e-07	1.01899e-06	bridging integrator 1	BIN1	chr2q14
220711_at	7.436	6.808	-0.628	2.43536e-07	6.61184e-07	---	---	---
226922_at	5.97	5.342	-0.628	0.000166543	0.00014951	RAN binding protein 2	RANBP2	chr2q12.3
243482_at	5.559	4.931	-0.628	7.4969e-07	1.65385e-06	epidermal growth factor receptor pathway substrate 15-like 1 /// uncharacterized LOC105372294	EPS15L1 /// LOC105372294	chr19p13.11
36553_at	8.179	7.551	-0.628	9.62982e-07	2.03499e-06	acetylserotonin O-methyltransferase-like	ASMTL	chrXp22.3; Yp11.3
203113_s_at	10.285	9.656	-0.629	7.32532e-06	1.08808e-05	eukaryotic translation elongation factor 1 delta (guanine nucleotide exchange protein)	EEF1D	chr8q24.3
211971_s_at	8.22	7.591	-0.629	3.71192e-05	4.23764e-05	leucine-rich pentatricopeptide repeat containing	LRPPRC	chr2p21
223305_at	8.034	7.405	-0.629	1.85881e-10	1.8518e-09	transmembrane protein 216	TMEM216	chr11q13.1
227455_at	5.818	5.189	-0.629	1.9784e-06	3.69071e-06	chromosome 6 open reading frame 136	C6orf136	chr6p21.33
228986_at	7.541	6.912	-0.629	4.18503e-05	4.67871e-05	oxysterol binding protein-like 8	OSBPL8	chr12q14
230917_at	8.119	7.49	-0.629	2.23915e-07	6.16314e-07	phospholipase C, gamma 2 (phosphatidylinositol-specific)	PLCG2	chr16q24.1
239131_at	5.455	4.826	-0.629	5.18054e-06	8.14004e-06	---	---	---
239744_at	6.179	5.55	-0.629	0.000120524	0.000113975	regulator of G-protein signaling 3	RGS3	chr9q32
202200_s_at	9.96	9.331	-0.629	2.21255e-06	4.05356e-06	SRSF protein kinase 1	SRPK1	chr6p21.31
214143_x_at	11.825	11.195	-0.63	9.6703e-06	1.36758e-05	ribosomal protein L24	RPL24	chr3q12
229204_at	7.294	6.664	-0.63	6.65651e-05	6.91874e-05	---	---	---
201221_s_at	9.611	8.981	-0.63	7.58977e-09	3.82844e-08	small nuclear ribonucleoprotein, U1 70kDa subunit	SNRNP70	chr19q13.3
204222_s_at	10.309	9.678	-0.631	1.30867e-07	3.97582e-07	GLI pathogenesis-related 1	GLIPR1	chr12q21.2
1570588_at	6.084	5.453	-0.631	7.75427e-09	3.88787e-08	MPRIP antisense RNA 1	MPRIP-AS1	chr17p11.2
211113_s_at	6.81	6.179	-0.631	1.59436e-06	3.08734e-06	ATP binding cassette subfamily G member 1	ABCG1	chr21q22.3
1558345_a_at	6.514	5.883	-0.631	1.39315e-06	2.76427e-06	zinc finger protein 487	ZNF487	chr10q11.21
204461_x_at	6.599	5.968	-0.631	0.000285057	0.00023502	RAD1 checkpoint DNA exonuclease	RAD1	chr5p13.2
204798_at	6.118	5.487	-0.631	2.49303e-06	4.46572e-06	v-myb avian myeloblastosis viral oncogene homolog	MYB	chr6q22-q23
225295_at	6.966	6.335	-0.631	0.000401736	0.000313183	solute carrier family 39 (zinc transporter), member 10	SLC39A10	chr2q32.3
225670_at	6.461	5.83	-0.631	1.29854e-09	9.16496e-09	family with sequence similarity 173, member B	FAM173B	chr5p15.2
230177_at	5.856	5.225	-0.631	8.30438e-06	1.20854e-05	general transcription factor IIH subunit 2 /// general transcription factor IIH subunit 2B (pseudogene) /// GTF2H2 family member C	GTF2H2 /// GTF2H2B /// GTF2H2C	chr5q13.2
231024_at	6.417	5.786	-0.631	3.96825e-06	6.53437e-06	PGM5 antisense RNA 1	PGM5-AS1	chr9q13
232330_at	8.782	8.151	-0.631	1.01345e-06	2.12181e-06	cytochrome c oxidase assembly factor 1 homolog	COA1	chr7p13
203139_at	8.734	8.102	-0.632	5.1477e-08	1.87907e-07	death-associated protein kinase 1	DAPK1	chr9q21.33
212520_s_at	6.975	6.343	-0.632	1.07643e-07	3.38645e-07	SWI/SNF related, matrix associated, actin dependent regulator of chromatin, subfamily a, member 4	SMARCA4	chr19p13.2
226372_at	9.772	9.14	-0.632	4.10029e-08	1.54875e-07	carbohydrate (chondroitin 4) sulfotransferase 11	CHST11	chr12q
202293_at	6.543	5.911	-0.632	1.84118e-06	3.47541e-06	stromal antigen 1	STAG1	chr3q22.3
227531_at	6.57	5.938	-0.632	0.000223569	0.000191661	clock circadian regulator	CLOCK	chr4q12
65630_at	8.047	7.415	-0.632	1.61413e-09	1.08738e-08	transmembrane protein 80	TMEM80	chr11p15.5
212738_at	8.405	7.772	-0.633	3.06036e-10	2.77868e-09	Rho GTPase activating protein 19	ARHGAP19	chr10q24.1
1553145_at	6.485	5.852	-0.633	1.09822e-06	2.26688e-06	TAPT1 antisense RNA 1 (head to head)	TAPT1-AS1	chr4p15.32
218754_at	8.356	7.723	-0.633	1.04892e-06	2.18265e-06	nucleolar protein 9	NOL9	chr1p36.31
219192_at	6.932	6.299	-0.633	0.000798235	0.000562108	ubiquitin associated protein 2	UBAP2	chr9p13.3
224847_at	7.458	6.825	-0.633	6.88201e-06	1.033e-05	cyclin-dependent kinase 6	CDK6	chr7q21-q22
225189_s_at	4.695	4.062	-0.633	3.06894e-05	3.60457e-05	Ras association (RalGDS/AF-6) and pleckstrin homology domains 1	RAPH1	chr2q33
227611_at	5.829	5.196	-0.633	5.98746e-05	6.32228e-05	threonyl-tRNA synthetase-like 2	TARSL2	chr15q26.3
228680_at	5.163	4.53	-0.633	1.30416e-05	1.75819e-05	kinesin family member 3A	KIF3A	chr5q31
242287_at	6.442	5.809	-0.633	1.87404e-08	8.08372e-08	CAP-GLY domain containing linker protein 1	CLIP1	chr12q24.3
200631_s_at	10.07	9.437	-0.633	3.47708e-06	5.86496e-06	SET nuclear proto-oncogene	SET	chr9q34
205434_s_at	9.394	8.761	-0.633	1.34482e-08	6.14407e-08	AP2 associated kinase 1	AAK1	chr2p14
200674_s_at	12.844	12.21	-0.634	1.62452e-07	4.73869e-07	ribosomal protein L32	RPL32	chr3p25-p24
210766_s_at	7.342	6.708	-0.634	6.68988e-06	1.00852e-05	CSE1 chromosome segregation 1-like (yeast)	CSE1L	chr20q13
229021_at	8.075	7.441	-0.634	9.08017e-07	1.93381e-06	multiple C2 domains, transmembrane 2	MCTP2	chr15q26.2
230983_at	6.97	6.336	-0.634	7.31483e-06	1.08698e-05	family with sequence similarity 129, member C	FAM129C	chr19p13.11
203286_at	10.071	9.437	-0.634	1.27673e-09	9.04924e-09	ring finger protein 44	RNF44	chr5q35.2
242117_at	5.573	4.939	-0.634	0.00407637	0.00225698	---	---	---
203582_s_at	6.545	5.91	-0.635	9.74978e-06	1.37665e-05	RAB4A, member RAS oncogene family	RAB4A	chr1q42-q43
207796_x_at	5.966	5.331	-0.635	0.000835652	0.000583938	killer cell lectin-like receptor subfamily D, member 1	KLRD1	chr12p13
214551_s_at	6.521	5.886	-0.635	3.66065e-05	4.18911e-05	CD7 molecule	CD7	chr17q25.2-q25.3
214815_at	6.135	5.5	-0.635	0.000138936	0.000127962	tripartite motif containing 33	TRIM33	chr1p13.1
227726_at	8.405	7.77	-0.635	9.112e-09	4.43002e-08	ring finger protein 166	RNF166	chr16q24.3
244358_at	7.866	7.231	-0.635	7.69278e-05	7.80913e-05	---	---	---
203627_at	7.022	6.387	-0.635	7.88554e-06	1.15676e-05	insulin-like growth factor 1 receptor	IGF1R	chr15q26.3
209153_s_at	7.235	6.6	-0.635	2.45887e-06	4.41701e-06	transcription factor 3	TCF3	chr19p13.3
216693_x_at	5.546	4.911	-0.635	2.00853e-06	3.73818e-06	hepatoma-derived growth factor, related protein 3	HDGFRP3	chr15q25.2
227168_at	8.297	7.662	-0.635	4.74403e-07	1.13201e-06	myocardial infarction associated transcript (non-protein coding)	MIAT	chr22q12.1
212812_at	8.862	8.226	-0.636	4.5476e-06	7.29249e-06	serine incorporator 5	SERINC5	chr5q14.1
224592_x_at	9.751	9.115	-0.636	2.53986e-07	6.83862e-07	heterochromatin protein 1, binding protein 3	HP1BP3	chr1p36.12
229235_at	8.325	7.689	-0.636	0.000240092	0.000203203	nuclear factor of activated T-cells, cytoplasmic, calcineurin-dependent 2 interacting protein	NFATC2IP	chr16p11.2
230669_at	9.122	8.486	-0.636	1.6145e-09	1.08738e-08	RAS p21 protein activator 2	RASA2	chr3q22-q23
201486_at	6.305	5.669	-0.636	0.00120657	0.000799199	reticulocalbin 2, EF-hand calcium binding domain	RCN2	chr15q23
201711_x_at	7.256	6.62	-0.636	0.000615191	0.000449677	RAN binding protein 2	RANBP2	chr2q12.3
211469_s_at	5.806	5.17	-0.636	0.000177212	0.000157844	chemokine (C-X-C motif) receptor 6	CXCR6	chr3p21
212640_at	7.836	7.2	-0.636	8.8916e-05	8.83355e-05	3-hydroxyacyl-CoA dehydratase 2	HACD2	chr3q21.1
213129_s_at	5.636	5	-0.636	0.000274571	0.000227604	glycine cleavage system protein H (aminomethyl carrier)	GCSH	chr16q23.2
229364_at	7.173	6.537	-0.636	3.28942e-07	8.48116e-07	uncharacterized LOC101928673	LOC101928673	chr1q25.1
239238_at	6.376	5.74	-0.636	2.65368e-05	3.18247e-05	---	---	---
242024_at	5.21	4.574	-0.636	1.39138e-05	1.85436e-05	---	---	---
227435_at	8.457	7.821	-0.636	2.33933e-08	9.68804e-08	upstream transcription factor family member 3	USF3	chr3q13.2
1557300_s_at	5.928	5.291	-0.637	1.79428e-06	3.40479e-06	---	---	---
200000_s_at	8.801	8.164	-0.637	9.64369e-08	3.1148e-07	pre-mRNA processing factor 8	PRPF8	chr17p13.3
201688_s_at	5.663	5.026	-0.637	0.00126023	0.000829706	tumor protein D52	TPD52	chr8q21.13
204857_at	7.276	6.639	-0.637	2.04096e-05	2.55267e-05	MAD1 mitotic arrest deficient-like 1 (yeast)	MAD1L1	chr7p22
208896_at	7.288	6.651	-0.637	0.000337184	0.000270353	DEAD (Asp-Glu-Ala-Asp) box polypeptide 18	DDX18	chr2q14.1
209604_s_at	8.325	7.688	-0.637	1.655e-05	2.14241e-05	GATA binding protein 3	GATA3	chr10p15
209827_s_at	9.395	8.758	-0.637	1.65375e-08	7.2908e-08	interleukin 16	IL16	chr15q26.3
228623_at	7.54	6.903	-0.637	7.56881e-07	1.66687e-06	---	---	---
235766_x_at	9.744	9.107	-0.637	1.66563e-09	1.11449e-08	RAB27A, member RAS oncogene family	RAB27A	chr15q21.3
238807_at	7.024	6.387	-0.637	1.09401e-06	2.25949e-06	ankyrin repeat domain 46 /// glyceraldehyde 3 phosphate dehydrogenase pseudogene 62	ANKRD46 /// GAPDHP62	chr8q22.2
241505_at	5.902	5.265	-0.637	9.97462e-05	9.74038e-05	---	---	---
1558237_x_at	7.298	6.66	-0.638	3.5169e-06	5.91888e-06	down-regulator of transcription 1	DR1	chr1p22.1
212301_at	7.947	7.309	-0.638	7.05506e-07	1.57256e-06	RTF1 homolog, Paf1/RNA polymerase II complex component	RTF1	chr15q15.1
219342_at	5.555	4.917	-0.638	0.000248681	0.000209287	CAS1 domain containing 1	CASD1	chr7q21.3
226368_at	9.144	8.506	-0.638	2.9625e-08	1.18713e-07	carbohydrate (chondroitin 4) sulfotransferase 11	CHST11	chr12q
230304_at	7.007	6.369	-0.638	6.12983e-05	6.45361e-05	---	---	---
242673_at	7.658	7.02	-0.638	6.24384e-06	9.50782e-06	---	---	---
200817_x_at	12.016	11.377	-0.639	3.40844e-06	5.77008e-06	ribosomal protein S10	RPS10	chr6p21.31
209515_s_at	10.247	9.608	-0.639	1.79618e-09	1.1822e-08	RAB27A, member RAS oncogene family	RAB27A	chr15q21.3
214917_at	5.887	5.248	-0.639	3.10989e-06	5.35192e-06	protein kinase, AMP-activated, alpha 1 catalytic subunit	PRKAA1	chr5p12
241742_at	8.661	8.022	-0.639	4.85064e-06	7.70608e-06	PML-RARA regulated adaptor molecule 1	PRAM1	chr19p13.2
202165_at	7.231	6.592	-0.639	0.000148777	0.000135478	protein phosphatase 1, regulatory (inhibitor) subunit 2	PPP1R2	chr3q29
203551_s_at	5.852	5.213	-0.639	1.73972e-06	3.31619e-06	COX11 cytochrome c oxidase copper chaperone	COX11	chr17q22
208498_s_at	6.203	5.564	-0.639	0.000125432	0.000117775	amylase, alpha 1A (salivary) /// amylase, alpha 1B (salivary) /// amylase, alpha 1C (salivary) /// amylase, alpha 2A (pancreatic) /// amylase, alpha 2B (pancreatic) /// amylase, alpha pseudogene 1	AMY1A /// AMY1B /// AMY1C /// AMY2A /// AMY2B /// AMYP1	chr1p21
232583_at	8.051	7.412	-0.639	8.28226e-07	1.79642e-06	---	---	---
239556_at	5.041	4.402	-0.639	9.21358e-07	1.95816e-06	uncharacterized LOC645513	LOC645513	chr4q26
239851_at	5.292	4.653	-0.639	2.49083e-06	4.46447e-06	---	---	---
223199_at	10.913	10.274	-0.639	1.29778e-10	1.40829e-09	MAP kinase interacting serine/threonine kinase 2	MKNK2	chr19p13.3
225197_at	8.732	8.092	-0.64	4.08491e-09	2.31076e-08	chromosome 16 open reading frame 72	C16orf72	chr16p13.2
201230_s_at	7.356	6.716	-0.64	3.5162e-08	1.36331e-07	ariadne RBR E3 ubiquitin protein ligase 2	ARIH2	chr3p21
213666_at	7.754	7.114	-0.64	1.54193e-05	2.02269e-05	septin 6	2019-09-06	chrXq24
215599_at	5.725	5.085	-0.64	0.000138829	0.00012788	glucuronidase, beta pseudogene 3	GUSBP3	chr5q13.2
222997_s_at	8.411	7.771	-0.64	6.1383e-05	6.46063e-05	mitochondrial ribosomal protein S21	MRPS21	chr1q21
226365_at	7.34	6.7	-0.64	7.07285e-06	1.05715e-05	---	---	---
236511_at	4.989	4.349	-0.64	4.64665e-06	7.42312e-06	---	---	---
1558371_a_at	6.833	6.193	-0.64	5.85094e-08	2.07147e-07	---	---	---
214003_x_at	12.878	12.238	-0.64	1.08709e-06	2.24908e-06	ribosomal protein S20	RPS20	chr8q12
1562505_at	5.732	5.091	-0.641	1.32225e-06	2.64702e-06	---	---	---
204847_at	7.671	7.03	-0.641	0.00240499	0.00144176	zinc finger and BTB domain containing 11	ZBTB11	chr3q12.3
206574_s_at	7.796	7.155	-0.641	1.05937e-05	1.4772e-05	protein tyrosine phosphatase type IVA, member 3	PTP4A3	chr8q24.3
218346_s_at	7.228	6.587	-0.641	2.54221e-06	4.52929e-06	sestrin 1	SESN1	chr6q21
223685_s_at	7.081	6.44	-0.641	6.83941e-10	5.391e-09	uncharacterized LOC101928524 /// pre-mRNA processing factor 18	LOC101928524 /// PRPF18	chr10p13
223712_at	6.053	5.412	-0.641	3.24949e-06	5.54692e-06	pterin-4 alpha-carbinolamine dehydratase/dimerization cofactor of hepatocyte nuclear factor 1 alpha (TCF1) 2	PCBD2	chr5q31.1
226639_at	7.431	6.79	-0.641	1.03391e-07	3.28581e-07	SFT2 domain containing 3	SFT2D3	chr2q14.3
229969_at	6.166	5.525	-0.641	1.73364e-06	3.30874e-06	SEC63 homolog, protein translocation regulator	SEC63	chr6q21
233940_at	5.958	5.317	-0.641	0.000134222	0.000124419	---	---	---
241867_at	5.807	5.166	-0.641	3.93178e-08	1.49613e-07	---	---	---
1552347_at	7.236	6.594	-0.642	1.11414e-07	3.48169e-07	crystallin zeta like 1	CRYZL1	chr21q21.3
212352_s_at	10.299	9.657	-0.642	1.88292e-07	5.33198e-07	transmembrane p24 trafficking protein 10	TMED10	chr14q24.3
227741_at	6.286	5.644	-0.642	3.60563e-05	4.13707e-05	3-hydroxyacyl-CoA dehydratase 2	HACD2	chr3q21.1
229606_at	9.407	8.765	-0.642	3.02355e-08	1.20602e-07	---	---	---
237441_at	7.191	6.549	-0.642	2.6523e-08	1.07666e-07	---	---	---
201681_s_at	5.341	4.699	-0.642	0.000104926	0.000101541	discs, large homolog 5 (Drosophila)	DLG5	chr10q23
216199_s_at	7.775	7.133	-0.642	2.57718e-06	4.58248e-06	mitogen-activated protein kinase kinase kinase 4	MAP3K4	chr6q26
226832_at	8.201	7.559	-0.642	2.90927e-06	5.07239e-06	ring finger protein 168, E3 ubiquitin protein ligase	RNF168	chr3q29
240690_at	6.03	5.388	-0.642	6.99346e-08	2.39671e-07	---	---	---
222062_at	8.728	8.085	-0.643	6.54393e-07	1.47513e-06	interleukin 27 receptor, alpha	IL27RA	chr19p13.11
1558711_at	8.469	7.826	-0.643	1.8789e-07	5.3227e-07	FAM13A antisense RNA 1	FAM13A-AS1	chr4q22.1
205171_at	8.382	7.739	-0.643	4.1411e-05	4.6414e-05	protein tyrosine phosphatase, non-receptor type 4 (megakaryocyte)	PTPN4	chr2q14.2
205254_x_at	6.925	6.282	-0.643	5.16613e-06	8.12097e-06	transcription factor 7 (T-cell specific, HMG-box)	TCF7	chr5q31.1
209712_at	6.47	5.827	-0.643	3.77058e-07	9.39417e-07	solute carrier family 35 (UDP-GlcA/UDP-GalNAc transporter), member D1	SLC35D1	chr1p31.3
242143_at	7.777	7.134	-0.643	3.04109e-08	1.21118e-07	---	---	---
212042_x_at	11.739	11.096	-0.643	0.000332552	0.000267236	ribosomal protein L7	RPL7	chr8q21.11
223216_x_at	6.509	5.866	-0.643	7.34261e-08	2.4889e-07	F-box protein 16 /// zinc finger protein 395	FBXO16 /// ZNF395	chr8p21.1
228971_at	5.717	5.073	-0.644	4.01965e-10	3.50759e-09	solute carrier family 25 (mitochondrial carrier; phosphate carrier), member 3	SLC25A3	chr12q23
1569703_a_at	4.798	4.154	-0.644	1.98366e-07	5.57545e-07	---	---	---
201134_x_at	10.247	9.603	-0.644	0.00118466	0.000786575	cytochrome c oxidase subunit VIIc	COX7C	chr5q14
209425_at	4.793	4.149	-0.644	6.06526e-08	2.1368e-07	alpha-methylacyl-CoA racemase /// C1QTNF3-AMACR readthrough (NMD candidate)	AMACR /// C1QTNF3-AMACR	chr5p /// chr5p13
219627_at	7.438	6.794	-0.644	4.89075e-08	1.79901e-07	zinc finger family member 767, pseudogene	ZNF767P	chr7q36.1
219751_at	5.315	4.671	-0.644	1.02545e-05	1.43942e-05	SET domain containing 6	SETD6	chr16q21
223283_s_at	6.247	5.603	-0.644	2.73846e-07	7.27236e-07	teashirt zinc finger homeobox 1	TSHZ1	chr18q22.3
230464_at	7.815	7.171	-0.644	3.65513e-05	4.18346e-05	sphingosine-1-phosphate receptor 5	S1PR5	chr19p13.2
1555846_a_at	7.506	6.861	-0.645	1.83991e-09	1.20086e-08	---	---	---
1558971_at	4.898	4.253	-0.645	0.0074334	0.00376492	thymocyte selection associated	THEMIS	chr6q22.33
203625_x_at	6.994	6.349	-0.645	7.80021e-06	1.14581e-05	S-phase kinase-associated protein 2, E3 ubiquitin protein ligase	SKP2	chr5p13
208873_s_at	8.636	7.991	-0.645	0.000344125	0.000275211	receptor accessory protein 5	REEP5	chr5q22-q23
218287_s_at	8.302	7.657	-0.645	8.63673e-10	6.56947e-09	argonaute RISC catalytic component 1 /// argonaute RISC catalytic component 3	AGO1 /// AGO3	chr1p34 /// chr1p34.3
219022_at	6.507	5.862	-0.645	1.05637e-07	3.33944e-07	chromosome 12 open reading frame 43	C12orf43	chr12q24.31
220710_at	5.532	4.887	-0.645	1.11312e-05	1.53899e-05	ANP32A intronic transcript 1	ANP32A-IT1	chr15q23
226098_at	5.361	4.716	-0.645	0.001067	0.000719243	intraflagellar transport 80	IFT80	chr3q25.33
36711_at	6.606	5.961	-0.645	1.8596e-05	2.36041e-05	v-maf avian musculoaponeurotic fibrosarcoma oncogene homolog F	MAFF	chr22q13.1
201689_s_at	4.915	4.269	-0.646	0.00046371	0.000353318	tumor protein D52	TPD52	chr8q21.13
207606_s_at	5.558	4.912	-0.646	0.00115407	0.00076947	Rho GTPase activating protein 12	ARHGAP12	chr10p11.22
208633_s_at	7.032	6.386	-0.646	5.97661e-07	1.36832e-06	KIAA0754 /// microtubule-actin crosslinking factor 1	KIAA0754 /// MACF1	chr1p32-p31 /// chr1p34.3
209798_at	7.381	6.735	-0.646	0.000471691	0.000358522	nuclear protein, ataxia-telangiectasia locus	NPAT	chr11q22-q23
223125_s_at	6.949	6.303	-0.646	1.17047e-05	1.60835e-05	chromosome 1 open reading frame 21	C1orf21	chr1q25
218242_s_at	8.884	8.238	-0.646	5.56254e-09	2.95712e-08	lysine (K)-specific methyltransferase 5B	KMT5B	chr11q13.2
228039_at	5.924	5.278	-0.646	2.20307e-07	6.07851e-07	DEAD (Asp-Glu-Ala-Asp) box polypeptide 46	DDX46	chr5q31.1
200016_x_at	12.338	11.691	-0.647	1.03778e-07	3.29188e-07	heterogeneous nuclear ribonucleoprotein A1	HNRNPA1	chr12q13.1
226611_s_at	5.068	4.421	-0.647	2.6095e-08	1.06235e-07	centromere protein V	CENPV	chr17p11.2
1560156_at	6.429	5.782	-0.647	2.04178e-05	2.55281e-05	---	---	---
200029_at	12.581	11.934	-0.647	1.59636e-07	4.67366e-07	ribosomal protein L19	RPL19	chr17q12
204773_at	6.774	6.127	-0.647	1.03026e-06	2.14947e-06	interleukin 11 receptor, alpha	IL11RA	chr9p13
212549_at	10.215	9.568	-0.647	2.61614e-09	1.60561e-08	signal transducer and activator of transcription 5B	STAT5B	chr17q11.2
217814_at	7.144	6.497	-0.647	1.41101e-06	2.79122e-06	coiled-coil domain containing 47	CCDC47	chr17q23.3
226026_at	7.634	6.987	-0.647	2.86747e-09	1.73277e-08	disrupted in renal carcinoma 2	DIRC2	chr3q21.1
227116_at	8.454	7.807	-0.647	1.12688e-06	2.31139e-06	MON1 secretory trafficking family member B	MON1B	chr16q23.1
229141_at	6.091	5.444	-0.647	4.95996e-06	7.8502e-06	WD repeat domain 33	WDR33	chr2q14.3
234165_at	4.702	4.055	-0.647	1.40803e-07	4.22048e-07	prostaglandin D2 receptor (DP)	PTGDR	chr14q22.1
244418_at	5.317	4.67	-0.647	0.000132605	0.000123287	---	---	---
209657_s_at	5.175	4.527	-0.648	5.32748e-05	5.72712e-05	heat shock transcription factor 2	HSF2	chr6q22.31
226115_at	7.322	6.674	-0.648	0.000134353	0.000124509	AT hook containing transcription factor 1	AHCTF1	chr1q44
202192_s_at	9.226	8.578	-0.648	9.71946e-09	4.67268e-08	growth arrest-specific 7	GAS7	chr17p13.1
215967_s_at	7.413	6.765	-0.648	5.94646e-06	9.13937e-06	lymphocyte antigen 9	LY9	chr1q23.3
224763_at	6.86	6.212	-0.648	5.66526e-09	3.00563e-08	uncharacterized LOC100506548 /// ribosomal protein L37	LOC100506548 /// RPL37	chr5p13
200013_at	11.841	11.192	-0.649	3.56031e-06	5.9751e-06	ribosomal protein L24 /// ribosomal protein L24 pseudogene 4	RPL24 /// RPL24P4	chr3q12 /// chr6p21.1
215157_x_at	13.011	12.362	-0.649	1.56097e-10	1.64053e-09	poly(A) binding protein, cytoplasmic 1	PABPC1	chr8q22.2-q23
1569597_at	6.572	5.923	-0.649	1.50334e-09	1.02795e-08	---	---	---
215222_x_at	7.87	7.221	-0.649	5.95598e-06	9.15002e-06	KIAA0754 /// microtubule-actin crosslinking factor 1	KIAA0754 /// MACF1	chr1p32-p31 /// chr1p34.3
218100_s_at	5.851	5.202	-0.649	0.000735209	0.000523846	intraflagellar transport 57	IFT57	chr3q13.13
218839_at	6.376	5.727	-0.649	6.55585e-07	1.47689e-06	hes-related family bHLH transcription factor with YRPW motif 1	HEY1	chr8q21
221963_x_at	6.929	6.28	-0.649	9.57418e-08	3.09902e-07	zinc finger protein 587B	ZNF587B	---
232740_at	5.035	4.386	-0.649	5.95184e-06	9.14562e-06	MCM3AP antisense RNA 1	MCM3AP-AS1	chr21q22.3
1554952_s_at	7.784	7.134	-0.65	9.12628e-05	9.03791e-05	NLR family, pyrin domain containing 12	NLRP12	chr19q13.42
1565976_at	5.228	4.578	-0.65	3.74164e-05	4.26139e-05	---	---	---
225157_at	8.459	7.809	-0.65	5.77572e-10	4.69711e-09	MLX interacting protein	MLXIP	chr12q24.31
230178_s_at	5.856	5.206	-0.65	1.85657e-06	3.50169e-06	elongator acetyltransferase complex subunit 2	ELP2	chr18q12.2
232614_at	7.137	6.487	-0.65	0.00106632	0.000718915	---	---	---
238886_at	5.794	5.144	-0.65	1.83595e-07	5.23202e-07	transmembrane p24 trafficking protein 10	TMED10	chr14q24.3
1552310_at	6.687	6.037	-0.65	0.000234065	0.000199207	chromosome 15 open reading frame 40	C15orf40	chr15q25.2
200686_s_at	9.694	9.044	-0.65	2.29968e-05	2.81779e-05	serine/arginine-rich splicing factor 11	SRSF11	chr1p31
220694_at	6.713	6.063	-0.65	0.00015467	0.00014015	ASAP1 intronic transcript 1	ASAP1-IT1	chr8q24.21
235567_at	5.36	4.71	-0.65	1.09037e-05	1.51395e-05	RAR-related orphan receptor A	RORA	chr15q22.2
[truncated: 1,699 more rows]

## Sheet: Blood_D8_v_D1
	Baseline avg	Day 8 avg	log2 fold change	p value	FDR (q value)	Gene.Title	Gene.Symbol	Chromosomal.Location
202411_at	7.887	12.82	4.933	1.58651e-13	4.24949e-10	interferon, alpha-inducible protein 27	IFI27	chr14q32
219519_s_at	6.01	9.595	3.585	2.00549e-13	4.24949e-10	sialic acid binding Ig-like lectin 1, sialoadhesin	SIGLEC1	chr20p13
204439_at	8.182	11.754	3.572	1.86649e-11	8.31598e-09	interferon-induced protein 44-like	IFI44L	chr1p31.1
213797_at	8.507	11.729	3.222	1.04194e-10	2.2897e-08	radical S-adenosyl methionine domain containing 2	RSAD2	chr2p25.2
242625_at	8.653	11.652	2.999	1.47492e-09	1.6373e-07	radical S-adenosyl methionine domain containing 2	RSAD2	chr2p25.2
214453_s_at	7.881	10.85	2.969	6.86375e-11	1.67973e-08	interferon-induced protein 44	IFI44	chr1p31.1
214059_at	6.62	9.571	2.951	6.08814e-11	1.59894e-08	interferon-induced protein 44	IFI44	chr1p31.1
219211_at	6.029	8.83	2.801	6.27271e-13	8.54132e-10	ubiquitin specific peptidase 18	USP18	chr22q11.21
204972_at	8.058	10.741	2.683	1.28716e-13	4.24949e-10	2'-5'-oligoadenylate synthetase 2	OAS2	chr12q24.2
205552_s_at	7.926	10.554	2.628	1.35225e-11	7.32067e-09	2'-5'-oligoadenylate synthetase 1	OAS1	chr12q24.2
218400_at	8.564	11.151	2.587	7.51248e-12	5.39291e-09	2'-5'-oligoadenylate synthetase 2 /// 2'-5'-oligoadenylate synthetase 3	OAS2 /// OAS3	chr12q24.2
205483_s_at	9.97	12.538	2.568	9.42303e-12	6.34164e-09	ISG15 ubiquitin-like modifier	ISG15	chr1p36.33
226702_at	8.653	11.197	2.544	1.74794e-11	8.18332e-09	cytidine monophosphate (UMP-CMP) kinase 2, mitochondrial	CMPK2	chr2p25.2
202145_at	8.808	11.341	2.533	1.11236e-13	4.24949e-10	lymphocyte antigen 6 complex, locus E	LY6E	chr8q24.3
222154_s_at	7.008	9.533	2.525	8.22681e-13	9.20539e-10	spermatogenesis associated, serine-rich 2-like	SPATS2L	chr2q33.1
44673_at	7.116	9.576	2.46	6.34577e-13	8.54132e-10	sialic acid binding Ig-like lectin 1, sialoadhesin	SIGLEC1	chr20p13
219352_at	7.065	9.503	2.438	8.54892e-13	9.20539e-10	HECT and RLD domain containing E3 ubiquitin protein ligase family member 6	HERC6	chr4q22.1
203153_at	9.573	11.976	2.403	3.47926e-09	3.09623e-07	interferon-induced protein with tetratricopeptide repeats 1	IFIT1	chr10q23.31
202869_at	9.111	11.329	2.218	3.02766e-12	2.71679e-09	2'-5'-oligoadenylate synthetase 1	OAS1	chr12q24.2
204747_at	9.606	11.816	2.21	5.4259e-10	7.9896e-08	interferon-induced protein with tetratricopeptide repeats 3	IFIT3	chr10q24
204415_at	9.982	12.181	2.199	2.2958e-10	4.12015e-08	interferon, alpha-inducible protein 6	IFI6	chr1p35
235276_at	6.767	8.947	2.18	2.36786e-13	4.24949e-10	epithelial stromal interaction 1 (breast)	EPSTI1	chr13q13.3
219684_at	7.106	9.271	2.165	2.06749e-11	8.31598e-09	receptor (chemosensory) transporter protein 4	RTP4	chr3q27.3
202086_at	9.961	12.119	2.158	1.93829e-09	2.06423e-07	MX dynamin-like GTPase 1	MX1	chr21q22.3
206133_at	7.857	10.012	2.155	2.88732e-11	9.01931e-09	XIAP associated factor 1	XAF1	chr17p13.1
242234_at	7.296	9.421	2.125	1.2012e-10	2.58687e-08	XIAP associated factor 1	XAF1	chr17p13.1
219863_at	9.022	11.138	2.116	3.17553e-09	2.97337e-07	HECT and RLD domain containing E3 ubiquitin protein ligase 5	HERC5	chr4q22.1
205660_at	8.551	10.651	2.1	2.82539e-11	9.01931e-09	2'-5'-oligoadenylate synthetase-like	OASL	chr12q24.2
227609_at	9.199	11.298	2.099	2.25832e-11	8.31598e-09	epithelial stromal interaction 1 (breast)	EPSTI1	chr13q13.3
239979_at	8.208	10.297	2.089	1.39089e-10	2.88018e-08	---	---	---
218986_s_at	7.308	9.39	2.082	1.79219e-10	3.50875e-08	DEAD (Asp-Glu-Ala-Asp) box polypeptide 60	DDX60	chr4q32.3
202686_s_at	4.554	6.612	2.058	9.37919e-10	1.17435e-07	AXL receptor tyrosine kinase	AXL	chr19q13.1
228617_at	9.641	11.697	2.056	1.55179e-11	7.95691e-09	XIAP associated factor 1	XAF1	chr17p13.1
200923_at	6.537	8.564	2.027	3.19843e-11	9.56677e-09	lectin, galactoside-binding, soluble, 3 binding protein	LGALS3BP	chr17q25
205569_at	5.13	7.056	1.926	5.91759e-07	1.44163e-05	lysosomal-associated membrane protein 3	LAMP3	chr3q26.3-q27
208436_s_at	8.843	10.721	1.878	1.02914e-09	1.27376e-07	interferon regulatory factor 7	IRF7	chr11p15.5
58916_at	3.886	5.76	1.874	1.7976e-07	6.03002e-06	potassium channel tetramerization domain containing 14 /// NDUFC2-KCTD14 readthrough	KCTD14 /// NDUFC2-KCTD14	chr11q14.1
217502_at	8.431	10.269	1.838	1.92578e-08	1.17822e-06	interferon-induced protein with tetratricopeptide repeats 2	IFIT2	chr10q23.31
242020_s_at	6.629	8.456	1.827	2.0911e-11	8.31598e-09	Z-DNA binding protein 1	ZBP1	chr20q13.31
210797_s_at	8.564	10.384	1.82	2.45525e-11	8.52835e-09	2'-5'-oligoadenylate synthetase-like	OASL	chr12q24.2
222816_s_at	7.868	9.684	1.816	2.31688e-11	8.31598e-09	zinc finger, CCHC domain containing 2	ZCCHC2	chr18q21.33
230314_at	5.18	6.952	1.772	1.17236e-09	1.41841e-07	---	---	---
231455_at	3.482	5.25	1.768	2.77667e-08	1.51771e-06	long intergenic non-protein coding RNA 487	LINC00487	chr2p25.2
228607_at	6.499	8.252	1.753	1.10385e-11	6.99184e-09	2'-5'-oligoadenylate synthetase 2	OAS2	chr12q24.2
235112_at	6.291	8.006	1.715	2.57198e-10	4.4669e-08	KIAA1958	KIAA1958	chr9q32
219209_at	7.468	9.182	1.714	1.88218e-10	3.55564e-08	interferon induced, with helicase C domain 1	IFIH1	chr2q24
1552309_a_at	6.302	7.957	1.655	1.22131e-09	1.45107e-07	nexilin (F actin binding protein)	NEXN	chr1p31.1
225291_at	6.327	7.972	1.645	1.74524e-08	1.10375e-06	polyribonucleotide nucleotidyltransferase 1	PNPT1	chr2p15
223599_at	4.341	5.965	1.624	2.67678e-09	2.64434e-07	tripartite motif containing 6	TRIM6	chr11p15.4
208087_s_at	7.394	9.015	1.621	1.27074e-11	7.32067e-09	Z-DNA binding protein 1	ZBP1	chr20q13.31
235061_at	7.123	8.739	1.616	1.48918e-08	9.72755e-07	protein phosphatase, Mg2+/Mn2+ dependent, 1K	PPM1K	chr4q22.1
218543_s_at	9.01	10.624	1.614	2.22765e-11	8.31598e-09	poly(ADP-ribose) polymerase family member 12	PARP12	chr7q34
241812_at	4.659	6.273	1.614	8.26311e-10	1.08508e-07	spermatogenesis associated, serine-rich 2-like	SPATS2L	chr2q33.1
233425_at	7.214	8.818	1.604	5.49068e-10	7.9896e-08	---	---	---
215617_at	3.498	5.096	1.598	5.26886e-09	4.20256e-07	spermatogenesis associated, serine-rich 2-like	SPATS2L	chr2q33.1
219062_s_at	7.96	9.548	1.588	1.33292e-12	1.30479e-09	zinc finger, CCHC domain containing 2	ZCCHC2	chr18q21.33
203595_s_at	8.466	10.041	1.575	9.23013e-10	1.16928e-07	interferon-induced protein with tetratricopeptide repeats 5	IFIT5	chr10q23.31
241916_at	6.844	8.393	1.549	8.73306e-07	1.95097e-05	---	---	---
230036_at	8.234	9.78	1.546	2.90972e-10	4.82024e-08	sterile alpha motif domain containing 9-like	SAMD9L	chr7q21.2
226757_at	9.915	11.459	1.544	2.42162e-09	2.43698e-07	interferon-induced protein with tetratricopeptide repeats 2	IFIT2	chr10q23.31
235456_at	7.139	8.631	1.492	9.75561e-08	3.87629e-06	---	---	---
235157_at	7.565	9.034	1.469	1.95315e-10	3.62609e-08	---	---	---
226103_at	4.302	5.759	1.457	1.48075e-07	5.14339e-06	nexilin (F actin binding protein)	NEXN	chr1p31.1
209417_s_at	9.013	10.467	1.454	3.08638e-10	4.96028e-08	interferon-induced protein 35	IFI35	chr17q21
210705_s_at	6.397	7.841	1.444	6.25469e-10	8.86183e-08	tripartite motif containing 5	TRIM5	chr11p15
229450_at	11.389	12.821	1.432	3.42009e-09	3.06893e-07	interferon-induced protein with tetratricopeptide repeats 3	IFIT3	chr10q24
234764_x_at	6.974	8.389	1.415	1.02257e-06	2.21548e-05	immunoglobulin lambda-like polypeptide 5	IGLL5	chr22q11.22
223849_s_at	6.079	7.493	1.414	8.62209e-11	1.97536e-08	Mov10 RISC complex RNA helicase	MOV10	chr1p13.2
205230_at	6.093	7.506	1.413	2.49894e-06	4.41845e-05	rabphilin 3A	RPH3A	chr12q24.13
214472_at	7.372	8.783	1.411	4.78344e-07	1.24115e-05	histone cluster 1, H2ad /// histone cluster 1, H3d	HIST1H2AD /// HIST1H3D	chr6p21.3 /// chr6p22.1
203596_s_at	7.66	9.065	1.405	2.95654e-09	2.85995e-07	interferon-induced protein with tetratricopeptide repeats 5	IFIT5	chr10q23.31
224225_s_at	4.662	6.042	1.38	6.53373e-08	2.83688e-06	ets variant 7	ETV7	chr6p21
200986_at	7.51	8.886	1.376	1.05847e-08	7.30608e-07	serpin peptidase inhibitor, clade G (C1 inhibitor), member 1	SERPING1	chr11q12.1
202446_s_at	10.139	11.494	1.355	3.06677e-07	8.94191e-06	phospholipid scramblase 1	PLSCR1	chr3q23
235643_at	6.418	7.76	1.342	5.68271e-10	8.15877e-08	sterile alpha motif domain containing 9-like	SAMD9L	chr7q21.2
226603_at	8.976	10.317	1.341	5.89981e-09	4.5704e-07	sterile alpha motif domain containing 9-like	SAMD9L	chr7q21.2
232666_at	5.381	6.721	1.34	1.8641e-09	2.00725e-07	2'-5'-oligoadenylate synthetase 3	OAS3	chr12q24.2
235681_at	5.727	7.062	1.335	1.27955e-07	4.68641e-06	---	---	---
227347_x_at	5.917	7.251	1.334	4.18981e-09	3.53562e-07	hes family bHLH transcription factor 4	HES4	chr1p36.33
222793_at	8.284	9.608	1.324	1.2263e-09	1.45107e-07	DEAD (Asp-Glu-Ala-Asp) box polypeptide 58	DDX58	chr9p12
243271_at	9.845	11.157	1.312	4.65123e-09	3.79424e-07	---	---	---
243788_at	5.161	6.472	1.311	5.24121e-08	2.44315e-06	---	---	---
208180_s_at	5.63	6.94	1.31	1.74947e-06	3.34554e-05	histone cluster 1, H4h	HIST1H4H	chr6p22.1
232222_at	5.872	7.174	1.302	9.14396e-10	1.16928e-07	zinc finger, CCHC domain containing 2	ZCCHC2	chr18q21.33
201015_s_at	6.906	8.205	1.299	2.18941e-10	3.99581e-08	junction plakoglobin	JUP	chr17q21
226694_at	6.485	7.782	1.297	8.18696e-10	1.08508e-07	A kinase (PRKA) anchor protein 2 /// PALM2-AKAP2 readthrough	AKAP2 /// PALM2-AKAP2	chr9q31.3
225929_s_at	9.432	10.726	1.294	1.38222e-07	4.91271e-06	ring finger protein 213	RNF213	chr17q25.3
213294_at	9.054	10.346	1.292	2.18169e-08	1.27001e-06	eukaryotic translation initiation factor 2-alpha kinase 2	EIF2AK2	chr2p22-p21
1555251_a_at	4.418	5.706	1.288	3.33753e-07	9.48237e-06	otoferlin	OTOF	chr2p23.1
219545_at	5.27	6.546	1.276	3.88521e-07	1.06346e-05	potassium channel tetramerization domain containing 14 /// NDUFC2-KCTD14 readthrough	KCTD14 /// NDUFC2-KCTD14	chr11q14.1
219364_at	6.657	7.917	1.26	8.65479e-10	1.12282e-07	DEXH (Asp-Glu-X-His) box polypeptide 58	DHX58	chr17q21.2
208581_x_at	9.605	10.86	1.255	1.28591e-08	8.60032e-07	metallothionein 1X	MT1X	chr16q13
230000_at	7.293	8.537	1.244	3.6501e-08	1.88057e-06	ring finger protein 213	RNF213	chr17q25.3
218943_s_at	7.646	8.888	1.242	2.36672e-07	7.42992e-06	DEAD (Asp-Glu-Ala-Asp) box polypeptide 58	DDX58	chr9p12
202760_s_at	5.505	6.745	1.24	4.97201e-11	1.37277e-08	A kinase (PRKA) anchor protein 2 /// PALM2-AKAP2 readthrough	AKAP2 /// PALM2-AKAP2	chr9q31.3
228531_at	8.34	9.578	1.238	1.66283e-08	1.07217e-06	sterile alpha motif domain containing 9	SAMD9	chr7q21.2
231956_at	8.258	9.495	1.237	2.83949e-07	8.49316e-06	ring finger protein 213	RNF213	chr17q25.3
206553_at	5.976	7.208	1.232	6.48626e-11	1.62427e-08	2'-5'-oligoadenylate synthetase 2	OAS2	chr12q24.2
202430_s_at	9.082	10.311	1.229	2.53033e-06	4.46662e-05	phospholipid scramblase 1	PLSCR1	chr3q23
239033_at	5.215	6.437	1.222	1.0196e-07	3.99236e-06	---	---	---
201324_at	4.649	5.869	1.22	6.27774e-07	1.50553e-05	epithelial membrane protein 1	EMP1	chr12p12.3
201641_at	8.589	9.809	1.22	3.06289e-07	8.94191e-06	bone marrow stromal cell antigen 2	BST2	chr19p13.1
212845_at	5.631	6.849	1.218	5.86607e-07	1.43232e-05	sterile alpha motif domain containing 4A	SAMD4A	chr14q22.2
206461_x_at	9.443	10.658	1.215	4.58294e-08	2.20306e-06	metallothionein 1H	MT1H	chr16q13
236285_at	6.099	7.311	1.212	2.09141e-11	8.31598e-09	kelch domain containing 7B	KLHDC7B	chr22q13.33
232155_at	5.261	6.467	1.206	8.58752e-11	1.97536e-08	ring finger protein 213	RNF213	chr17q25.3
242060_x_at	6.23	7.434	1.204	1.76271e-08	1.10375e-06	PHD finger protein 11	PHF11	chr13q14.2
1569263_at	5.184	6.378	1.194	3.36811e-07	9.54406e-06	---	---	---
235256_s_at	6.974	8.166	1.192	7.09929e-11	1.69877e-08	galactose mutarotase (aldose 1-epimerase)	GALM	chr2p22.1
212185_x_at	10.617	11.808	1.191	2.89422e-08	1.56607e-06	metallothionein 2A	MT2A	chr16q13
217022_s_at	10.38	11.568	1.188	3.6733e-07	1.02206e-05	immunoglobulin heavy locus /// immunoglobulin heavy constant alpha 1 /// immunoglobulin heavy constant alpha 2 (A2m marker)	IGH /// IGHA1 /// IGHA2	chr14q32.33
205241_at	9.118	10.302	1.184	2.57395e-08	1.42133e-06	SCO2 cytochrome c oxidase assembly protein	SCO2	chr22q13.33
211430_s_at	9.206	10.383	1.177	4.1194e-05	0.000350927	immunoglobulin heavy constant gamma 1 (G1m marker) /// immunoglobulin heavy constant gamma 3 (G3m marker) /// immunoglobulin heavy constant mu /// immunoglobulin heavy variable 4-31	IGHG1 /// IGHG3 /// IGHM /// IGHV4-31	chr14q32.33
216766_at	5.202	6.379	1.177	7.77427e-06	0.000101716	---	---	---
231769_at	8.012	9.188	1.176	4.68682e-12	3.73308e-09	F-box protein 6	FBXO6	chr1p36.22
215379_x_at	10.802	11.966	1.164	6.39144e-08	2.80908e-06	BMS1 ribosome biogenesis factor pseudogene 20 /// immunoglobulin lambda constant 2 (Kern-Oz- marker) /// immunoglobulin lambda constant 3 (Kern-Oz+ marker) /// immunoglobulin lambda joining 2 /// immunoglobulin lambda joining 3 /// immunoglobulin lambda-like polypeptide 5 /// immunoglobulin lambda variable 1-44 /// immunoglobulin lambda variable 3-19 /// immunoglobulin lambda variable 3-25	BMS1P20 /// IGLC2 /// IGLC3 /// IGLJ2 /// IGLJ3 /// IGLL5 /// IGLV1-44 /// IGLV3-19 /// IGLV3-25	chr22q11.2 /// chr22q11.22
219895_at	3.203	4.354	1.151	2.89933e-06	4.86868e-05	transmembrane protein 255A	TMEM255A	chrXq24
203148_s_at	8.628	9.775	1.147	1.69951e-11	8.18332e-09	tripartite motif containing 14	TRIM14	chr9q22.33
209138_x_at	11.138	12.281	1.143	4.83187e-08	2.29203e-06	immunoglobulin lambda constant 1 (Mcg marker) /// immunoglobulin lambda joining 3	IGLC1 /// IGLJ3	chr22q11.2
228230_at	7.174	8.316	1.142	4.12288e-08	2.02716e-06	helicase with zinc finger 2, transcriptional coactivator	HELZ2	chr20q13.33
230166_at	5.068	6.21	1.142	8.84831e-09	6.30978e-07	KIAA1958	KIAA1958	chr9q32
209593_s_at	8.407	9.544	1.137	3.76582e-08	1.9145e-06	torsin family 1, member B (torsin B)	TOR1B	chr9q34
212592_at	7.803	8.939	1.136	0.00030288	0.00135845	joining chain of multimeric IgA and IgM	JCHAIN	chr4q21
1559585_at	4.925	6.06	1.135	3.46207e-08	1.8185e-06	DEAD (Asp-Glu-Ala-Asp) box polypeptide 60-like	DDX60L	chr4q32.3
202759_s_at	6.558	7.693	1.135	5.58881e-11	1.50449e-08	A kinase (PRKA) anchor protein 2 /// PALM2-AKAP2 readthrough	AKAP2 /// PALM2-AKAP2	chr9q31.3
217933_s_at	9.395	10.53	1.135	8.11939e-10	1.08508e-07	leucine aminopeptidase 3	LAP3	chr4p15.32
204994_at	10.53	11.663	1.133	2.26217e-08	1.30961e-06	MX dynamin-like GTPase 2	MX2	chr21q22.3
220059_at	5.824	6.953	1.129	1.86177e-06	3.50478e-05	signal transducing adaptor family member 1	STAP1	chr4q13.2
211456_x_at	9.525	10.647	1.122	6.48142e-08	2.82556e-06	metallothionein 1H-like 1	MT1HL1	chr1q43
215121_x_at	11.235	12.354	1.119	6.19366e-08	2.76661e-06	immunoglobulin lambda light chain-like /// immunoglobulin lambda constant 1 (Mcg marker) /// immunoglobulin lambda constant 2 (Kern-Oz- marker) /// immunoglobulin lambda constant 3 (Kern-Oz+ marker) /// immunoglobulin lambda constant 7 /// immunoglobulin lambda joining 3 /// immunoglobulin lambda-like polypeptide 5 /// immunoglobulin lambda variable 1-44 /// immunoglobulin lambda variable 3-25 //…	CYAT1 /// IGLC1 /// IGLC2 /// IGLC3 /// IGLC7 /// IGLJ3 /// IGLL5 /// IGLV1-44 /// IGLV3-25 /// IGLV4-3	chr22q11.2 /// chr22q11.22
AFFX-HUMISGF3A/M97935_MB_at	7.015	8.13	1.115	1.85179e-08	1.14597e-06	signal transducer and activator of transcription 1	STAT1	chr2q32.2
214677_x_at	11.345	12.456	1.111	8.23205e-08	3.42247e-06	immunoglobulin lambda light chain-like /// immunoglobulin lambda constant 1 (Mcg marker) /// immunoglobulin lambda constant 2 (Kern-Oz- marker) /// immunoglobulin lambda constant 3 (Kern-Oz+ marker) /// immunoglobulin lambda joining 3 /// immunoglobulin lambda variable 1-44 /// immunoglobulin lambda variable 3-25 /// immunoglobulin lambda variable 4-3	CYAT1 /// IGLC1 /// IGLC2 /// IGLC3 /// IGLJ3 /// IGLV1-44 /// IGLV3-25 /// IGLV4-3	chr22q11.2
219691_at	6.808	7.916	1.108	1.88204e-07	6.29353e-06	sterile alpha motif domain containing 9	SAMD9	chr7q21.2
224701_at	9.643	10.749	1.106	1.73618e-10	3.46204e-08	poly(ADP-ribose) polymerase family member 14	PARP14	chr3q21.1
224973_at	6.101	7.206	1.105	5.31016e-07	1.35176e-05	family with sequence similarity 46, member A	FAM46A	chr6q14
243754_at	5.426	6.525	1.099	4.8536e-12	3.73308e-09	uncharacterized LOC105373098	LOC105373098	---
223220_s_at	9.226	10.319	1.093	1.16643e-07	4.34602e-06	poly(ADP-ribose) polymerase family member 9	PARP9	chr3q21
226773_at	8.498	9.591	1.093	2.78527e-10	4.68618e-08	protein phosphatase, Mg2+/Mn2+ dependent, 1K	PPM1K	chr4q22.1
220146_at	5.708	6.795	1.087	1.99958e-07	6.60468e-06	toll-like receptor 7	TLR7	chrXp22.3
225344_at	8.437	9.524	1.087	4.05152e-07	1.10168e-05	nuclear receptor coactivator 7	NCOA7	chr6q22.32
236156_at	4.925	6.007	1.082	7.65334e-09	5.66868e-07	lipase A, lysosomal acid, cholesterol esterase /// uncharacterized LOC101926887	LIPA /// LOC101926887	chr10q23.2-q23.3
209684_at	7.689	8.769	1.08	1.12175e-05	0.00013421	Ras and Rab interactor 2	RIN2	chr20p11.22
226319_s_at	7.424	8.503	1.079	6.79658e-05	0.000497518	Aly/REF export factor	ALYREF	chr17q25.3
239669_at	4.876	5.954	1.078	1.35424e-05	0.000154474	---	---	---
211644_x_at	8.081	9.158	1.077	2.83158e-08	1.53991e-06	immunoglobulin kappa constant	IGKC	chr2p12
232035_at	6.1	7.171	1.071	1.35902e-06	2.75589e-05	histone cluster 1, H4h	HIST1H4H	chr6p22.1
211645_x_at	6.947	8.017	1.07	4.97433e-07	1.27992e-05	immunoglobulin kappa variable 1-17	IGKV1-17	chr2p12
1556643_at	7.016	8.08	1.064	1.53611e-09	1.68783e-07	BST2 interferon stimulated positive regulator (non-protein coding)	BISPR	---
225931_s_at	8.626	9.679	1.053	1.49058e-08	9.72755e-07	ring finger protein 213	RNF213	chr17q25.3
215176_x_at	8.761	9.808	1.047	2.29724e-07	7.23288e-06	immunoglobulin kappa variable 1-39 (gene/pseudogene) /// immunoglobulin kappa variable 1D-39	IGKV1-39 /// IGKV1D-39	chr2p12
228439_at	6.581	7.623	1.042	2.45996e-07	7.60116e-06	basic leucine zipper transcription factor, ATF-like 2	BATF2	chr11q13.1
204533_at	5.424	6.463	1.039	0.000370291	0.00156363	chemokine (C-X-C motif) ligand 10	CXCL10	chr4q21
209616_s_at	7.161	8.198	1.037	5.46026e-07	1.37052e-05	carboxylesterase 1 /// carboxylesterase 1 pseudogene 1	CES1 /// CES1P1	chr16q12.2 /// chr16q22.2
209374_s_at	9.201	10.235	1.034	3.85949e-08	1.93832e-06	immunoglobulin heavy constant mu	IGHM	chr14q32.33
244597_at	4.765	5.798	1.033	1.63103e-09	1.77402e-07	---	---	---
243999_at	5.758	6.789	1.031	5.17988e-08	2.43324e-06	schlafen family member 5	SLFN5	chr17q12
214522_x_at	6.903	7.931	1.028	6.96676e-06	9.28433e-05	histone cluster 1, H2ad /// histone cluster 1, H3d	HIST1H2AD /// HIST1H3D	chr6p21.3 /// chr6p22.1
206111_at	8.858	9.884	1.026	3.18706e-06	5.22106e-05	ribonuclease, RNase A family, 2 (liver, eosinophil-derived neurotoxin)	RNASE2	chr14q11.2
212657_s_at	10.14	11.159	1.019	4.93132e-08	2.32895e-06	interleukin 1 receptor antagonist	IL1RN	chr2q14.2
216576_x_at	7.558	8.577	1.019	4.1948e-08	2.04386e-06	---	---	---
203771_s_at	6.986	8.003	1.017	2.01359e-06	3.71269e-05	biliverdin reductase A	BLVRA	chr7p13
217179_x_at	7.198	8.214	1.016	5.41804e-06	7.65629e-05	---	---	---
212380_at	8.091	9.106	1.015	2.93164e-11	9.01931e-09	cap methyltransferase 1	CMTR1	chr6p21.2
216984_x_at	8.333	9.347	1.014	4.17001e-06	6.48954e-05	immunoglobulin lambda joining 3	IGLJ3	chr22q11.2
204326_x_at	8.836	9.849	1.013	2.2267e-09	2.26197e-07	metallothionein 1X	MT1X	chr16q13
217378_x_at	7.692	8.704	1.012	1.4771e-07	5.14339e-06	immunoglobulin kappa variable 1/OR2-108 (non-functional)	IGKV1OR2-108	chr2q12-q14
233811_at	5.134	6.143	1.009	2.91512e-07	8.6712e-06	Ras and Rab interactor 2	RIN2	chr20p11.22
239988_at	4.594	5.602	1.008	6.07593e-09	4.65489e-07	uncharacterized LOC102723458	LOC102723458	---
217148_x_at	8.769	9.769	1	6.92608e-06	9.24155e-05	immunoglobulin lambda variable 2-14	IGLV2-14	chr22q11.2
217235_x_at	7.779	8.778	0.999	2.25863e-07	7.20791e-06	immunoglobulin lambda variable cluster	IGLV@	chr22q11.2
214540_at	3.884	4.883	0.999	1.88024e-06	3.52108e-05	histone cluster 1, H2bo	HIST1H2BO	chr6p22.1
1557078_at	4.688	5.682	0.994	5.5001e-07	1.37731e-05	schlafen family member 5	SLFN5	chr17q12
216243_s_at	8.033	9.027	0.994	4.136e-07	1.1134e-05	interleukin 1 receptor antagonist	IL1RN	chr2q14.2
214255_at	6.778	7.771	0.993	1.37297e-09	1.57277e-07	ATPase, class V, type 10A	ATP10A	chr15q11.2
210846_x_at	5.759	6.749	0.99	1.79781e-13	4.24949e-10	tripartite motif containing 14	TRIM14	chr9q22.33
212859_x_at	9.275	10.263	0.988	1.16448e-07	4.34602e-06	metallothionein 1E	MT1E	chr16q13
209589_s_at	5.826	6.807	0.981	1.41574e-08	9.35245e-07	EPH receptor B2	EPHB2	chr1p36.1-p35
203505_at	7.934	8.914	0.98	4.25855e-07	1.14069e-05	ATP binding cassette subfamily A member 1	ABCA1	chr9q31.1
233072_at	7.247	8.227	0.98	8.39863e-07	1.89991e-05	netrin G2	NTNG2	chr9q34
1555764_s_at	7.874	8.853	0.979	1.98976e-08	1.20368e-06	translocase of inner mitochondrial membrane 10 homolog (yeast)	TIMM10	chr11q12.1
232961_at	3.713	4.687	0.974	6.73205e-05	0.000494985	spermatogenesis associated, serine-rich 2-like	SPATS2L	chr2q33.1
207777_s_at	7.564	8.537	0.973	4.54521e-10	6.89329e-08	SP140 nuclear body protein	SP140	chr2q37.1
230383_x_at	7.204	8.177	0.973	5.21812e-06	7.47618e-05	schlafen family member 5	SLFN5	chr17q12
237426_at	7.401	8.371	0.97	7.45729e-08	3.16139e-06	SP100 nuclear antigen	SP100	chr2q37.1
217227_x_at	6.238	7.207	0.969	5.20869e-07	1.32907e-05	---	---	---
211044_at	4.018	4.984	0.966	1.27356e-08	8.57096e-07	tripartite motif containing 14	TRIM14	chr9q22.33
211967_at	10.159	11.125	0.966	1.69724e-06	3.27521e-05	transmembrane protein 123	TMEM123	chr11q22.1
205692_s_at	7.08	8.044	0.964	5.19734e-08	2.43324e-06	CD38 molecule	CD38	chr4p15
216401_x_at	7.524	8.488	0.964	2.77263e-07	8.36287e-06	immunoglobulin kappa variable 1-37 (non-functional) /// immunoglobulin kappa variable 1D-37 (non-functional)	IGKV1-37 /// IGKV1D-37	chr2p12
203147_s_at	8.625	9.588	0.963	2.66653e-11	8.9728e-09	tripartite motif containing 14	TRIM14	chr9q22.33
241421_at	5.547	6.508	0.961	6.09127e-06	8.33421e-05	uncharacterized LOC105371472	LOC105371472	---
AFFX-HUMISGF3A/M97935_MA_at	8.1	9.061	0.961	7.50276e-08	3.16819e-06	signal transducer and activator of transcription 1	STAT1	chr2q32.2
216598_s_at	4.043	5.004	0.961	4.42437e-06	6.71002e-05	chemokine (C-C motif) ligand 2	CCL2	chr17q11.2-q12
203773_x_at	9.623	10.583	0.96	8.93714e-08	3.59083e-06	biliverdin reductase A	BLVRA	chr7p13
225353_s_at	5.471	6.429	0.958	2.13505e-05	0.000220845	complement component 1, q subcomponent, C chain	C1QC	chr1p36.11
201646_at	6.149	7.105	0.956	5.28065e-06	7.53132e-05	scavenger receptor class B, member 2	SCARB2	chr4q21.1
204745_x_at	9.007	9.961	0.954	3.00966e-07	8.85458e-06	metallothionein 1G	MT1G	chr16q13
205099_s_at	8.86	9.806	0.946	4.12153e-07	1.11229e-05	chemokine (C-C motif) receptor 1	CCR1	chr3p21
242898_at	4.78	5.726	0.946	1.30714e-07	4.7232e-06	eukaryotic translation initiation factor 2-alpha kinase 2	EIF2AK2	chr2p22-p21
205875_s_at	8.696	9.641	0.945	3.69014e-10	5.84339e-08	three prime repair exonuclease 1	TREX1	chr3p21.31
222986_s_at	10.348	11.292	0.944	3.41011e-11	9.92424e-09	shisa family member 5	SHISA5	chr3p21.31
53720_at	9.078	10.017	0.939	1.35972e-11	7.32067e-09	chromosome 19 open reading frame 66	C19orf66	chr19p13.2
242961_x_at	8.686	9.624	0.938	8.18094e-08	3.4144e-06	DEAD (Asp-Glu-Ala-Asp) box polypeptide 58	DDX58	chr9p12
229138_at	5.634	6.572	0.938	6.16777e-07	1.48245e-05	poly(ADP-ribose) polymerase family member 11	PARP11	chr12p13.3
1552793_at	4.513	5.444	0.931	1.44008e-06	2.88764e-05	chromosome 8 open reading frame 31	C8orf31	chr8q24.3
209911_x_at	8.745	9.675	0.93	1.95005e-06	3.62034e-05	histone cluster 1, H2bd	HIST1H2BD	chr6p21.3
229350_x_at	8.616	9.543	0.927	9.1359e-09	6.4297e-07	poly(ADP-ribose) polymerase family member 10	PARP10	chr8q24.3
228152_s_at	9.047	9.973	0.926	2.28355e-05	0.000228735	DEAD (Asp-Glu-Ala-Asp) box polypeptide 60-like	DDX60L	chr4q32.3
214768_x_at	7.502	8.427	0.925	5.94684e-07	1.44548e-05	immunoglobulin kappa variable 2-28 /// immunoglobulin kappa variable 2D-28	IGKV2-28 /// IGKV2D-28	chr2p12
228620_at	4.252	5.176	0.924	6.58846e-07	1.55579e-05	uncharacterized LOC101927027	LOC101927027	chr2q31.2
1554948_at	6.641	7.563	0.922	1.71051e-06	3.29492e-05	---	---	---
201785_at	6.338	7.259	0.921	9.83109e-07	2.15163e-05	ribonuclease, RNase A family, 1 (pancreatic)	RNASE1	chr14q11.2
213361_at	7.857	8.778	0.921	6.85963e-08	2.95455e-06	tudor domain containing 7	TDRD7	chr9q22.33
208965_s_at	9.381	10.301	0.92	1.36962e-05	0.000156062	interferon, gamma-inducible protein 16	IFI16	chr1q22
206025_s_at	9.52	10.439	0.919	5.8696e-06	8.13427e-05	tumor necrosis factor, alpha-induced protein 6	TNFAIP6	chr2q23.3
211729_x_at	9.622	10.54	0.918	1.04936e-07	4.00688e-06	biliverdin reductase A	BLVRA	chr7p13
204049_s_at	6.825	7.742	0.917	1.58005e-08	1.02493e-06	phosphatase and actin regulator 2	PHACTR2	chr6q24.2
204858_s_at	8.928	9.845	0.917	2.65247e-06	4.56255e-05	thymidine phosphorylase	TYMP	chr22q13.33
225415_at	9.873	10.788	0.915	3.68154e-09	3.19697e-07	deltex 3 like, E3 ubiquitin ligase	DTX3L	chr3q21.1
223565_at	5.786	6.7	0.914	1.82992e-05	0.00019665	marginal zone B and B1 cell-specific protein	MZB1	chr5q31.2
204048_s_at	8.114	9.026	0.912	7.59024e-10	1.03457e-07	phosphatase and actin regulator 2	PHACTR2	chr6q24.2
1559882_at	5.666	6.577	0.911	0.000131785	0.000780985	SAM domain and HD domain 1	SAMHD1	chr20pter-q12
219607_s_at	7.452	8.361	0.909	0.00182231	0.00440736	membrane-spanning 4-domains, subfamily A, member 4A	MS4A4A	chr11q12
1568592_at	8.461	9.366	0.905	1.18558e-08	8.07986e-07	ring finger protein 4 pseudogene /// tripartite motif containing 69	LOC100419583 /// TRIM69	chr15q21.1
210387_at	6.091	6.994	0.903	2.56869e-06	4.4684e-05	histone cluster 1, H2bg	HIST1H2BG	chr6p22.2
226725_at	7.593	8.494	0.901	1.6425e-06	3.19823e-05	schlafen family member 5	SLFN5	chr17q12
218408_at	7.487	8.385	0.898	1.15868e-08	7.94686e-07	translocase of inner mitochondrial membrane 10 homolog (yeast)	TIMM10	chr11q12.1
213293_s_at	11.047	11.943	0.896	4.33235e-08	2.09625e-06	tripartite motif containing 22	TRIM22	chr11p15
228304_at	6.791	7.686	0.895	9.56629e-11	2.14602e-08	RNA binding motif protein 43	RBM43	chr2q23.3
214777_at	6.933	7.827	0.894	2.49814e-06	4.41845e-05	immunoglobulin kappa variable 4-1	IGKV4-1	chr2p12
206828_at	6.016	6.907	0.891	1.08346e-05	0.000130645	TXK tyrosine kinase	TXK	chr4p12
225636_at	10.183	11.071	0.888	8.22516e-09	5.9843e-07	signal transducer and activator of transcription 2	STAT2	chr12q13.3
217258_x_at	6.07	6.956	0.886	3.9557e-06	6.24553e-05	---	---	---
211781_x_at	9.875	10.754	0.879	0.00272275	0.0056437	---	---	---
214669_x_at	9.835	10.712	0.877	9.14802e-08	3.64833e-06	immunoglobulin kappa constant	IGKC	chr2p12
205170_at	6.622	7.497	0.875	2.01207e-08	1.20408e-06	signal transducer and activator of transcription 2	STAT2	chr12q13.3
202864_s_at	8.822	9.694	0.872	5.64161e-08	2.57408e-06	SP100 nuclear antigen	SP100	chr2q37.1
227807_at	8.407	9.279	0.872	5.16985e-07	1.32229e-05	poly(ADP-ribose) polymerase family member 9	PARP9	chr3q21
215946_x_at	8.928	9.796	0.868	2.54978e-07	7.75586e-06	immunoglobulin lambda-like polypeptide 3, pseudogene	IGLL3P	chr22q11.23
210001_s_at	5.386	6.252	0.866	2.07451e-09	2.1479e-07	suppressor of cytokine signaling 1	SOCS1	chr16p13.13
216202_s_at	7.362	8.226	0.864	2.17453e-05	0.000222154	serine palmitoyltransferase, long chain base subunit 2	SPTLC2	chr14q24.3
208912_s_at	8.759	9.623	0.864	5.27227e-10	7.88489e-08	2',3'-cyclic nucleotide 3' phosphodiesterase	CNP	chr17q21
201694_s_at	5.893	6.756	0.863	1.07978e-05	0.000130493	early growth response 1	EGR1	chr5q31.1
221816_s_at	10.455	11.317	0.862	1.51586e-10	3.07974e-08	PHD finger protein 11	PHF11	chr13q14.2
230997_at	5.08	5.942	0.862	1.77674e-07	5.97867e-06	tetratricopeptide repeat domain 21A	TTC21A	chr3p22.2
220492_s_at	3.638	4.499	0.861	8.60775e-06	0.000109819	otoferlin	OTOF	chr2p23.1
202269_x_at	9.245	10.104	0.859	1.50083e-07	5.19638e-06	guanylate binding protein 1, interferon-inducible	GBP1	chr1p22.2
223434_at	7.944	8.802	0.858	3.02895e-05	0.000282274	guanylate binding protein 3	GBP3	chr1p22.2
224342_x_at	7.115	7.971	0.856	2.14399e-06	3.91292e-05	---	---	---
201649_at	10.451	11.306	0.855	2.55745e-10	4.4669e-08	ubiquitin-conjugating enzyme E2L 6	UBE2L6	chr11q12
208121_s_at	5.366	6.22	0.854	1.08499e-06	2.28185e-05	protein tyrosine phosphatase, receptor type, O	PTPRO	chr12p13.3-p13.2|12p13-p12
1553055_a_at	4.788	5.641	0.853	2.17433e-05	0.000222154	schlafen family member 5	SLFN5	chr17q12
1555728_a_at	6.42	7.271	0.851	0.000533536	0.00199481	membrane-spanning 4-domains, subfamily A, member 4A	MS4A4A	chr11q12
232563_at	3.718	4.568	0.85	5.75867e-05	0.000445465	zinc finger protein 684	ZNF684	chr1p34.2
209568_s_at	6.566	7.415	0.849	5.9619e-07	1.44588e-05	ral guanine nucleotide dissociation stimulator-like 1	RGL1	chr1q25.3
216491_x_at	6.038	6.887	0.849	1.07841e-06	2.27561e-05	immunoglobulin heavy constant mu	IGHM	chr14q32.33
205098_at	10.639	11.486	0.847	7.00169e-08	3.00373e-06	chemokine (C-C motif) receptor 1	CCR1	chr3p21
203258_at	7.85	8.696	0.846	2.15473e-09	2.20971e-07	DR1-associated protein 1 (negative cofactor 2 alpha)	DRAP1	chr11q13.3
212733_at	8.995	9.841	0.846	4.14239e-10	6.37211e-08	RUN domain and cysteine-rich domain containing, Beclin 1-interacting protein	RUBCN	chr3q29
218085_at	8.292	9.138	0.846	0.000137942	0.000801155	charged multivesicular body protein 5	CHMP5	chr9p13.3
216336_x_at	8.957	9.799	0.842	2.79394e-07	8.38754e-06	metallothionein 1E	MT1E	chr16q13
237315_at	5.129	5.97	0.841	1.51936e-07	5.2437e-06	uncharacterized LOC102724965	LOC102724965	---
1555464_at	3.745	4.585	0.84	7.98718e-08	3.3465e-06	interferon induced, with helicase C domain 1	IFIH1	chr2q24
232210_at	8.561	9.4	0.839	1.98038e-06	3.664e-05	---	---	---
236692_at	5.849	6.687	0.838	2.63691e-06	4.54303e-05	---	---	---
202007_at	4.53	5.367	0.837	3.16856e-06	5.20102e-05	nidogen 1	NID1	chr1q43
221345_at	10.47	11.301	0.831	0.000965133	0.00291432	free fatty acid receptor 2	FFAR2	chr19q13.1
231577_s_at	9.13	9.958	0.828	1.49695e-06	2.97398e-05	guanylate binding protein 1, interferon-inducible	GBP1	chr1p22.2
228714_at	5.146	5.973	0.827	4.1829e-09	3.53562e-07	uncharacterized LOC101927027	LOC101927027	chr2q31.2
1558569_at	6.082	6.907	0.825	6.76436e-05	0.000496172	uncharacterized LOC100131541	LOC100131541	chr11q21
212659_s_at	7.541	8.366	0.825	2.09663e-07	6.86147e-06	interleukin 1 receptor antagonist	IL1RN	chr2q14.2
209218_at	6.042	6.866	0.824	4.46582e-07	1.17573e-05	squalene epoxidase	SQLE	chr8q24.1
234884_x_at	6.272	7.094	0.822	3.21661e-06	5.25586e-05	immunoglobulin lambda light chain-like /// immunoglobulin lambda-like polypeptide 5 /// immunoglobulin lambda variable 3-1	CYAT1 /// IGLL5 /// IGLV3-1	chr22q11.2 /// chr22q11.22
239582_at	5.616	6.438	0.822	6.9135e-10	9.66803e-08	promyelocytic leukemia	PML	chr15q22
200730_s_at	6.349	7.17	0.821	6.43074e-05	0.000479432	protein tyrosine phosphatase type IVA, member 1	PTP4A1	chr6q12
1554447_at	5.194	6.014	0.82	9.26841e-07	2.04931e-05	JPX transcript, XIST activator (non-protein coding)	JPX	chrXq13.2
225335_at	5.977	6.796	0.819	7.21932e-10	9.96627e-08	zinc finger protein 496	ZNF496	chr1q44
243993_at	6.831	7.649	0.818	4.57109e-07	1.19867e-05	---	---	---
202708_s_at	8.945	9.761	0.816	6.11467e-07	1.47452e-05	histone cluster 2, H2be	HIST2H2BE	chr1q21.2
209762_x_at	9.794	10.609	0.815	4.20285e-09	3.53562e-07	SP110 nuclear body protein	SP110	chr2q37.1
206641_at	5.172	5.984	0.812	0.0024372	0.00527083	tumor necrosis factor receptor superfamily, member 17	TNFRSF17	chr16p13.1
214038_at	4.045	4.856	0.811	0.000300121	0.00135148	chemokine (C-C motif) ligand 8	CCL8	chr17q11.2
214836_x_at	9.372	10.183	0.811	8.13735e-07	1.86034e-05	immunoglobulin kappa locus /// immunoglobulin kappa constant /// immunoglobulin kappa variable 1-5 /// immunoglobulin kappa variable 2-28 /// immunoglobulin kappa variable 2D-28	IGK /// IGKC /// IGKV1-5 /// IGKV2-28 /// IGKV2D-28	chr2p12
211643_x_at	7.376	8.186	0.81	4.50087e-09	3.69961e-07	immunoglobulin kappa constant	IGKC	chr2p12
205593_s_at	5.236	6.045	0.809	2.45078e-06	4.36195e-05	phosphodiesterase 9A	PDE9A	chr21q22.3
209803_s_at	4.756	5.563	0.807	3.25595e-07	9.34926e-06	pleckstrin homology-like domain, family A, member 2	PHLDA2	chr11p15.4
203610_s_at	8.34	9.143	0.803	3.01263e-09	2.87077e-07	tripartite motif containing 38	TRIM38	chr6p21.3
216560_x_at	6.516	7.319	0.803	6.89375e-05	0.000503604	immunoglobulin lambda variable 3-10	IGLV3-10	chr22q11.2
234974_at	7.111	7.912	0.801	8.58376e-09	6.16194e-07	galactose mutarotase (aldose 1-epimerase)	GALM	chr2p22.1
231241_at	5.788	6.587	0.799	3.59661e-05	0.000318749	---	---	---
216207_x_at	8.227	9.023	0.796	1.13078e-07	4.27234e-06	immunoglobulin kappa variable 1D-13	IGKV1D-13	chr2p12
238430_x_at	8.419	9.211	0.792	8.37969e-07	1.89961e-05	schlafen family member 5	SLFN5	chr17q12
206647_at	6.421	7.211	0.79	0.00315575	0.00619371	hemoglobin, zeta	HBZ	chr16p13.3
222217_s_at	7.563	8.353	0.79	3.35314e-09	3.06893e-07	solute carrier family 27 (fatty acid transporter), member 3	SLC27A3	chr1q21.3
235927_at	6.767	7.556	0.789	6.05772e-08	2.72924e-06	exportin 1	XPO1	chr2p15
202068_s_at	6.542	7.33	0.788	2.07115e-07	6.82015e-06	low density lipoprotein receptor	LDLR	chr19p13.2
211798_x_at	6.853	7.641	0.788	1.0191e-06	2.21242e-05	immunoglobulin lambda joining 3	IGLJ3	chr22q11.2
218429_s_at	9.145	9.932	0.787	1.09444e-09	1.33919e-07	chromosome 19 open reading frame 66	C19orf66	chr19p13.2
202863_at	8.614	9.401	0.787	2.53503e-07	7.73284e-06	SP100 nuclear antigen	SP100	chr2q37.1
214617_at	10.345	11.13	0.785	2.15933e-07	6.98242e-06	perforin 1 (pore forming protein)	PRF1	chr10q22
221766_s_at	9.253	10.038	0.785	1.28974e-09	1.50954e-07	family with sequence similarity 46, member A	FAM46A	chr6q14
225447_at	7.069	7.854	0.785	3.7455e-08	1.9145e-06	glycerol-3-phosphate dehydrogenase 2	GPD2	chr2q24.1
1553681_a_at	8.719	9.502	0.783	4.74096e-07	1.23608e-05	perforin 1 (pore forming protein)	PRF1	chr10q22
1553749_at	5.778	6.561	0.783	0.00146136	0.00384831	family with sequence similarity 76, member B	FAM76B	chr11q21
203568_s_at	9.546	10.328	0.782	4.02467e-10	6.28076e-08	tripartite motif containing 38	TRIM38	chr6p21.3
241347_at	7.892	8.673	0.781	1.04388e-07	4.00688e-06	ring finger protein 213	RNF213	chr17q25.3
208012_x_at	10.02	10.8	0.78	7.3341e-09	5.52258e-07	SP110 nuclear body protein	SP110	chr2q37.1
226107_at	7.188	7.967	0.779	2.27832e-07	7.21551e-06	core 1 synthase, glycoprotein-N-acetylgalactosamine 3-beta-galactosyltransferase 1	C1GALT1	chr7p21.3
232614_at	7.112	7.891	0.779	1.0191e-06	2.21242e-05	---	---	---
1562528_at	5.282	6.059	0.777	0.00145979	0.00384513	---	---	---
227947_at	7.503	8.279	0.776	2.98732e-06	4.97368e-05	phosphatase and actin regulator 2	PHACTR2	chr6q24.2
203504_s_at	7.593	8.368	0.775	1.28741e-05	0.000148902	ATP binding cassette subfamily A member 1	ABCA1	chr9q31.1
1560386_at	5.135	5.909	0.774	2.52835e-07	7.73284e-06	---	---	---
203753_at	6.508	7.282	0.774	2.49909e-08	1.3943e-06	transcription factor 4	TCF4	chr18q21.1
238743_at	4.394	5.168	0.774	1.05234e-06	2.25279e-05	---	---	---
219014_at	11.32	12.094	0.774	1.46936e-06	2.94088e-05	placenta specific 8	PLAC8	chr4q21.22
203567_s_at	9.171	9.944	0.773	1.77332e-08	1.10375e-06	tripartite motif containing 38	TRIM38	chr6p21.3
230233_at	4.884	5.657	0.773	4.89491e-06	7.17114e-05	---	---	---
232375_at	8.538	9.309	0.771	3.60531e-07	1.00574e-05	---	---	---
213069_at	7.092	7.862	0.77	6.21139e-08	2.76661e-06	heart development protein with EGF-like domains 1	HEG1	chr3q21.2
240413_at	5.352	6.122	0.77	0.0014491	0.00382632	pyrin and HIN domain family, member 1	PYHIN1	chr1q23.1
224900_at	8.366	9.135	0.769	1.73092e-08	1.10286e-06	ankyrin repeat and FYVE domain containing 1	ANKFY1	chr17p13.3
206026_s_at	9.418	10.186	0.768	0.000142516	0.000818891	tumor necrosis factor, alpha-induced protein 6	TNFAIP6	chr2q23.3
210164_at	9.873	10.639	0.766	1.07465e-05	0.000130307	granzyme B	GZMB	chr14q11.2
200733_s_at	7.53	8.296	0.766	0.000149971	0.000848595	protein tyrosine phosphatase type IVA, member 1	PTP4A1	chr6q12
219716_at	7.215	7.978	0.763	4.3842e-07	1.16277e-05	apolipoprotein L, 6	APOL6	chr22q12.3
1552623_at	7.064	7.826	0.762	2.86932e-06	4.83514e-05	hematopoietic SH2 domain containing	HSH2D	chr19p13.12
214995_s_at	7.238	8	0.762	0.000932764	0.00283806	apolipoprotein B mRNA editing enzyme, catalytic polypeptide-like 3F /// apolipoprotein B mRNA editing enzyme, catalytic polypeptide-like 3G	APOBEC3F /// APOBEC3G	chr22q13.1 /// chr22q13.1-q13.2
217165_x_at	8.732	9.493	0.761	1.96785e-09	2.06423e-07	metallothionein 1F	MT1F	chr16q13
1563075_s_at	7.847	8.607	0.76	1.4246e-05	0.000161814	---	---	---
222708_s_at	6.633	7.392	0.759	4.31778e-06	6.64103e-05	syntaxin 17	STX17	chr9q31.1
AFFX-HUMISGF3A/M97935_5_at	5.143	5.899	0.756	1.29083e-07	4.70824e-06	signal transducer and activator of transcription 1	STAT1	chr2q32.2
204698_at	10.422	11.177	0.755	2.38936e-08	1.35413e-06	interferon stimulated exonuclease gene 20kDa	ISG20	chr15q26
221671_x_at	11.823	12.572	0.749	8.63447e-07	1.93698e-05	immunoglobulin kappa locus /// immunoglobulin kappa constant /// immunoglobulin kappa variable 1-5 /// immunoglobulin kappa variable 2-24	IGK /// IGKC /// IGKV1-5 /// IGKV2-24	chr2p12
206715_at	5.962	6.709	0.747	0.00262238	0.00551838	transcription factor EC	TFEC	chr7q31.2
209761_s_at	10.409	11.156	0.747	1.49286e-06	2.97135e-05	SP110 nuclear body protein	SP110	chr2q37.1
221651_x_at	11.77	12.517	0.747	1.03652e-06	2.23734e-05	immunoglobulin kappa locus /// immunoglobulin kappa constant /// immunoglobulin kappa variable 1-5 /// immunoglobulin kappa variable 2-24	IGK /// IGKC /// IGKV1-5 /// IGKV2-24	chr2p12
1555491_a_at	6.478	7.223	0.745	1.39026e-09	1.57581e-07	chromosome 19 open reading frame 66	C19orf66	chr19p13.2
206157_at	4.523	5.268	0.745	5.0981e-06	7.34884e-05	pentraxin 3, long	PTX3	chr3q25
200887_s_at	10.557	11.302	0.745	8.53357e-08	3.5072e-06	signal transducer and activator of transcription 1	STAT1	chr2q32.2
211013_x_at	6.481	7.225	0.744	2.75664e-10	4.68618e-08	promyelocytic leukemia	PML	chr15q22
224983_at	8.681	9.422	0.741	1.323e-07	4.76453e-06	scavenger receptor class B, member 2	SCARB2	chr4q21.1
1554343_a_at	4.42	5.161	0.741	3.47656e-06	5.62936e-05	signal transducing adaptor family member 1	STAP1	chr4q13.2
219356_s_at	8.887	9.627	0.74	0.000263643	0.00124349	charged multivesicular body protein 5	CHMP5	chr9p13.3
AFFX-HUMISGF3A/M97935_3_at	9.837	10.577	0.74	3.39777e-07	9.60286e-06	signal transducer and activator of transcription 1	STAT1	chr2q32.2
242471_at	8.351	9.091	0.74	2.90711e-07	8.6712e-06	---	---	---
38241_at	8.209	8.948	0.739	6.37602e-09	4.83496e-07	butyrophilin, subfamily 3, member A3	BTN3A3	chr6p21.3
203236_s_at	8.386	9.122	0.736	1.29657e-08	8.6181e-07	lectin, galactoside-binding, soluble, 9	LGALS9	chr17q11.2
1557071_s_at	6.774	7.505	0.731	1.47302e-06	2.94274e-05	negative regulator of ubiquitin-like proteins 1	NUB1	chr7q36
206486_at	5.655	6.386	0.731	5.65105e-07	1.40207e-05	lymphocyte-activation gene 3	LAG3	chr12p13.32
1566698_at	4.751	5.481	0.73	2.10998e-05	0.000219094	---	---	---
241869_at	6.576	7.306	0.73	0.000437091	0.0017477	apolipoprotein L, 6	APOL6	chr22q12.3
223298_s_at	9.813	10.543	0.73	1.52689e-07	5.25286e-06	5'-nucleotidase, cytosolic IIIA	NT5C3A	chr7p14.3
215495_s_at	5.215	5.944	0.729	2.55292e-06	4.46725e-05	sterile alpha motif domain containing 4A	SAMD4A	chr14q22.2
220104_at	7.924	8.653	0.729	0.000302905	0.00135845	zinc finger CCCH-type, antiviral 1	ZC3HAV1	chr7q34
214329_x_at	8.325	9.052	0.727	0.000515302	0.00194829	tumor necrosis factor (ligand) superfamily, member 10	TNFSF10	chr3q26
211284_s_at	10.167	10.893	0.726	4.68621e-08	2.2427e-06	granulin	GRN	chr17q21.32
216510_x_at	4.922	5.648	0.726	1.43177e-07	5.03829e-06	immunoglobulin heavy constant alpha 1 /// immunoglobulin heavy constant gamma 1 (G1m marker) /// immunoglobulin heavy constant mu /// immunoglobulin heavy variable 3-23 /// immunoglobulin heavy variable 4-31 /// immunoglobulin kappa locus /// zinc finger, CW type with PWWP domain 2	IGHA1 /// IGHG1 /// IGHM /// IGHV3-23 /// IGHV4-31 /// IGK /// ZCWPW2	chr14q32.33 /// chr2p12 /// chr3p24.1
241956_at	7.273	7.999	0.726	1.60316e-05	0.000177755	---	---	---
206991_s_at	7.808	8.533	0.725	1.20981e-08	8.19317e-07	chemokine (C-C motif) receptor 5 (gene/pseudogene)	CCR5	chr3p21.31
243791_at	4.351	5.074	0.723	2.08118e-08	1.23131e-06	---	---	---
224795_x_at	12.019	12.741	0.722	1.43889e-06	2.88764e-05	immunoglobulin kappa locus /// immunoglobulin kappa constant /// immunoglobulin kappa variable 1-5 /// immunoglobulin kappa variable 2-24	IGK /// IGKC /// IGKV1-5 /// IGKV2-24	chr2p12
209906_at	8.584	9.305	0.721	1.08109e-07	4.11346e-06	complement component 3a receptor 1	C3AR1	chr12p13.31
244774_at	5.366	6.085	0.719	0.000175928	0.000942006	phosphatase and actin regulator 2	PHACTR2	chr6q24.2
205698_s_at	7.387	8.105	0.718	5.28822e-05	0.000419315	mitogen-activated protein kinase kinase 6	MAP2K6	chr17q24.3
33304_at	9.962	10.68	0.718	9.87751e-08	3.88302e-06	interferon stimulated exonuclease gene 20kDa	ISG20	chr15q26
202270_at	8.692	9.409	0.717	0.000104098	0.000665666	guanylate binding protein 1, interferon-inducible	GBP1	chr1p22.2
202314_at	5.649	6.365	0.716	1.47811e-06	2.94744e-05	cytochrome P450, family 51, subfamily A, polypeptide 1 /// leucine-rich repeats and death domain containing 1	CYP51A1 /// LRRD1	chr7q21.2
211637_x_at	6.619	7.335	0.716	1.23202e-06	2.52209e-05	---	---	---
235756_at	6.263	6.979	0.716	1.0466e-07	4.00688e-06	---	---	---
201138_s_at	7.229	7.944	0.715	3.37915e-05	0.000305767	Sjogren syndrome antigen B (autoantigen La)	SSB	chr2q31.1
1555613_a_at	7.674	8.388	0.714	0.000784604	0.00254627	zeta chain of T cell receptor associated protein kinase 70kDa	ZAP70	chr2q12
229569_at	6.08	6.794	0.714	0.000283747	0.00130071	---	---	---
236193_at	7.008	7.721	0.713	3.80184e-05	0.000331271	histone cluster 1, H2bc	HIST1H2BC	chr6p22.1
243286_at	6.909	7.622	0.713	2.33468e-08	1.33721e-06	---	---	---
233421_s_at	5.672	6.382	0.71	3.19046e-06	5.22106e-05	nucleoporin 133kDa	NUP133	chr1q42.13
211996_s_at	9.944	10.653	0.709	0.00172757	0.00426267	nuclear pore complex-interacting protein family member B5-like /// nuclear pore complex interacting protein pseudogene /// nuclear pore complex interacting protein family, member B11 /// nuclear pore complex interacting protein family, member B3 /// nuclear pore complex interacting protein family, member B4 /// nuclear pore complex interacting protein family, member B5	LOC105369248 /// LOC613037 /// NPIPB11 /// NPIPB3 /// NPIPB4 /// NPIPB5	chr16p11.2 /// chr16p12.2
235508_at	7.062	7.77	0.708	1.94565e-07	6.44632e-06	promyelocytic leukemia	PML	chr15q22
219759_at	7.634	8.341	0.707	0.000111115	0.000696032	endoplasmic reticulum aminopeptidase 2	ERAP2	chr5q15
222670_s_at	9.301	10.008	0.707	1.50426e-06	2.983e-05	v-maf avian musculoaponeurotic fibrosarcoma oncogene homolog B	MAFB	chr20q12
1556202_at	5.663	6.369	0.706	3.00477e-07	8.85458e-06	SLIT-ROBO Rho GTPase activating protein 2	SRGAP2	chr1q32.1
201212_at	5.12	5.824	0.704	1.13574e-06	2.36548e-05	legumain	LGMN	chr14q32.1
230753_at	6.551	7.255	0.704	1.19953e-06	2.47878e-05	protein associated with topoisomerase II homolog 2 (yeast)	PATL2	chr15q21.1
218927_s_at	7.769	8.472	0.703	1.40436e-07	4.97434e-06	carbohydrate (chondroitin 4) sulfotransferase 12 /// uncharacterized LOC101927181	CHST12 /// LOC101927181	chr7p22 /// chr7p22.3
218999_at	10.041	10.742	0.701	1.22193e-06	2.50621e-05	transmembrane protein 140	TMEM140	chr7q33
212386_at	7.816	8.517	0.701	1.82813e-06	3.45353e-05	transcription factor 4	TCF4	chr18q21.1
220335_x_at	8.087	8.787	0.7	0.00072303	0.00242087	carboxylesterase 3	CES3	chr16q22.1
228899_at	5.632	6.332	0.7	6.32618e-07	1.51124e-05	---	---	---
204821_at	8.172	8.872	0.7	1.97453e-09	2.06423e-07	butyrophilin, subfamily 3, member A3	BTN3A3	chr6p21.3
203593_at	6.771	7.468	0.697	0.000900249	0.00277441	CD2-associated protein	CD2AP	chr6p12
243598_at	5.517	6.213	0.696	3.05531e-09	2.8859e-07	---	---	---
1563573_at	6.481	7.176	0.695	3.03039e-05	0.000282274	---	---	---
223980_s_at	9.87	10.565	0.695	1.06578e-06	2.26355e-05	SP110 nuclear body protein	SP110	chr2q37.1
226040_at	7.87	8.565	0.695	5.62092e-06	7.86046e-05	tripartite motif containing 56	TRIM56	chr7q22.1
220576_at	4.572	5.266	0.694	7.17592e-07	1.67613e-05	post-GPI attachment to proteins 1	PGAP1	chr2q33.1
233917_s_at	5.712	6.406	0.694	2.96931e-08	1.59071e-06	Mov10 RISC complex RNA helicase	MOV10	chr1p13.2
219118_at	7.482	8.175	0.693	0.000178982	0.000953615	FK506 binding protein 11	FKBP11	chr12q13.12
225869_s_at	7.014	7.706	0.692	8.49131e-07	1.91685e-05	unc-93 homolog B1 (C. elegans)	UNC93B1	chr11q13
204731_at	7.59	8.281	0.691	0.000198273	0.0010229	transforming growth factor beta receptor III	TGFBR3	chr1p33-p32
208392_x_at	8.81	9.5	0.69	1.34328e-07	4.82144e-06	SP110 nuclear body protein	SP110	chr2q37.1
232517_s_at	5.96	6.649	0.689	8.7987e-06	0.000111023	helicase with zinc finger 2, transcriptional coactivator	HELZ2	chr20q13.33
207795_s_at	7.066	7.752	0.686	0.000727912	0.00243124	killer cell lectin-like receptor subfamily D, member 1	KLRD1	chr12p13
214933_at	6.45	7.135	0.685	3.41924e-09	3.06893e-07	calcium channel, voltage-dependent, P/Q type, alpha 1A subunit	CACNA1A	chr19p13
230695_s_at	4.957	5.639	0.682	1.38978e-06	2.80244e-05	radial spoke head 9 homolog (Chlamydomonas)	RSPH9	chr6p21.1
238039_at	6.937	7.619	0.682	6.09534e-09	4.65489e-07	SCAMP1 antisense RNA 1	SCAMP1-AS1	chr5q14.1
205267_at	7.777	8.458	0.681	2.55412e-06	4.46725e-05	POU class 2 associating factor 1	POU2AF1	chr11q23.1
202581_at	7.373	8.053	0.68	5.5047e-05	0.000432026	heat shock 70kDa protein 1A /// heat shock 70kDa protein 1B	HSPA1A /// HSPA1B	chr6p21.3
218559_s_at	9.859	10.539	0.68	3.52277e-06	5.68708e-05	v-maf avian musculoaponeurotic fibrosarcoma oncogene homolog B	MAFB	chr20q12
207614_s_at	7.882	8.561	0.679	4.54677e-11	1.2884e-08	cullin 1	CUL1	chr7q36.1
206676_at	6.071	6.748	0.677	0.0065077	0.0099949	carcinoembryonic antigen-related cell adhesion molecule 8	CEACAM8	chr19q13.2
209969_s_at	10.132	10.809	0.677	1.59339e-06	3.13665e-05	signal transducer and activator of transcription 1	STAT1	chr2q32.2
213915_at	10.723	11.397	0.674	0.000132538	0.000783721	natural killer cell granule protein 7	NKG7	chr19q13.41
1559777_at	6.077	6.75	0.673	0.00395014	0.00714509	MIR3945 host gene	MIR3945HG	---
1564276_at	3.945	4.617	0.672	4.80243e-07	1.24308e-05	chromosome 5 open reading frame 56	C5orf56	chr5q31.1
228468_at	4.402	5.074	0.672	2.57358e-05	0.000250561	microtubule associated serine/threonine kinase-like	MASTL	chr10p12.1
202018_s_at	8.477	9.149	0.672	0.00166558	0.00417598	lactotransferrin	LTF	chr3p21.31
206503_x_at	6.388	7.059	0.671	5.3477e-09	4.23408e-07	promyelocytic leukemia	PML	chr15q22
210218_s_at	7.428	8.099	0.671	1.04026e-06	2.24029e-05	SP100 nuclear antigen	SP100	chr2q37.1
242600_at	6.404	7.075	0.671	0.000864434	0.00270664	FERM domain containing 3	FRMD3	chr9q21.32
218974_at	4.75	5.42	0.67	2.79639e-07	8.38754e-06	sine oculis binding protein homolog	SOBP	chr6q21
203029_s_at	6.925	7.594	0.669	9.43367e-06	0.000117299	protein tyrosine phosphatase, receptor type, N polypeptide 2	PTPRN2	chr7q36
211776_s_at	5.849	6.518	0.669	0.000316184	0.00139708	erythrocyte membrane protein band 4.1-like 3	EPB41L3	chr18p11.32
201242_s_at	4.605	5.272	0.667	0.000137192	0.000798716	ATPase, Na+/K+ transporting, beta 1 polypeptide	ATP1B1	chr1q24
213043_s_at	6.784	7.45	0.666	2.09476e-08	1.23257e-06	mediator complex subunit 24	MED24	chr17q21.1
218397_at	5.607	6.273	0.666	0.000308788	0.00137465	Fanconi anemia complementation group L	FANCL	chr2p16.1
204805_s_at	8.546	9.211	0.665	2.15526e-06	3.92684e-05	H1 histone family, member X	H1FX	chr3q21.3
236191_at	4.391	5.056	0.665	4.37743e-06	6.68055e-05	---	---	---
201279_s_at	6.62	7.284	0.664	2.60419e-07	7.89904e-06	Dab, mitogen-responsive phosphoprotein, homolog 2 (Drosophila)	DAB2	chr5p13.1
214916_x_at	7.242	7.906	0.664	6.05161e-06	8.30145e-05	immunoglobulin heavy constant alpha 1 /// immunoglobulin heavy constant alpha 2 (A2m marker) /// immunoglobulin heavy constant gamma 1 (G1m marker) /// immunoglobulin heavy constant gamma 3 (G3m marker) /// immunoglobulin heavy joining 4 /// immunoglobulin heavy constant mu /// immunoglobulin heavy variable 3-23 /// immunoglobulin heavy variable 4-31 /// immunoglobulin kappa locus /// zinc finger…	IGHA1 /// IGHA2 /// IGHG1 /// IGHG3 /// IGHJ4 /// IGHM /// IGHV3-23 /// IGHV4-31 /// IGK /// ZCWPW2	chr14q32.33 /// chr2p12 /// chr3p24.1
200678_x_at	10.664	11.327	0.663	1.3824e-07	4.91271e-06	granulin	GRN	chr17q21.32
1556590_s_at	5.576	6.238	0.662	0.000645176	0.0022461	---	---	---
201798_s_at	7.351	8.013	0.662	3.05323e-05	0.000283911	myoferlin	MYOF	chr10q24
216041_x_at	10.593	11.253	0.66	2.52317e-07	7.73284e-06	granulin	GRN	chr17q21.32
212828_at	5.602	6.262	0.66	1.17815e-06	2.44435e-05	synaptojanin 2	SYNJ2	chr6q25.3
1556314_a_at	5.227	5.886	0.659	3.10315e-05	0.00028756	zinc finger protein 366	ZNF366	chr5q13.2|5q13.2
225466_at	7.303	7.962	0.659	1.04061e-07	4.00688e-06	protein associated with topoisomerase II homolog 1 (yeast)	PATL1	chr11q12.1
222786_at	7.861	8.519	0.658	1.6089e-07	5.48244e-06	carbohydrate (chondroitin 4) sulfotransferase 12 /// uncharacterized LOC101927181	CHST12 /// LOC101927181	chr7p22 /// chr7p22.3
244011_at	4.872	5.528	0.656	3.57229e-07	9.99119e-06	protein phosphatase, Mg2+/Mn2+ dependent, 1K	PPM1K	chr4q22.1
244414_at	7.928	8.582	0.654	3.43931e-05	0.000308361	---	---	---
209773_s_at	6.72	7.374	0.654	0.00276707	0.00570904	ribonucleotide reductase M2	RRM2	chr2p25-p24
242405_at	7.922	8.575	0.653	1.13302e-05	0.000135408	---	---	---
226662_at	6.278	6.93	0.652	4.02419e-09	3.46657e-07	syntaxin 17	STX17	chr9q31.1
210985_s_at	4.916	5.567	0.651	0.00119593	0.00336115	SP100 nuclear antigen	SP100	chr2q37.1
232787_at	6.84	7.491	0.651	1.71853e-07	5.80093e-06	helicase with zinc finger 2, transcriptional coactivator	HELZ2	chr20q13.33
237459_at	5.351	6.002	0.651	1.00367e-06	2.19218e-05	---	---	---
227458_at	7.551	8.2	0.649	0.000987796	0.00296198	CD274 molecule	CD274	chr9p24
225897_at	8.048	8.696	0.648	0.00218107	0.00492255	myristoylated alanine-rich protein kinase C substrate	MARCKS	chr6q22.2
1570566_at	6.287	6.934	0.647	0.00197933	0.00464544	---	---	---
239411_at	6.127	6.774	0.647	1.461e-09	1.6373e-07	---	---	---
213201_s_at	6.042	6.687	0.645	2.62271e-05	0.000254424	troponin T type 1 (skeletal, slow)	TNNT1	chr19q13.4
214693_x_at	7.547	8.192	0.645	1.90147e-05	0.000202612	notch homolog 2 N-terminal-like protein /// neuroblastoma breakpoint family member 1 /// neuroblastoma breakpoint family, member 1 /// neuroblastoma breakpoint family, member 10 /// neuroblastoma breakpoint family, member 11 /// neuroblastoma breakpoint family, member 12 /// neuroblastoma breakpoint family, member 14 /// neuroblastoma breakpoint family, member 15 /// neuroblastoma breakpoint fami…	LOC100996763 /// LOC102724250 /// NBPF1 /// NBPF10 /// NBPF11 /// NBPF12 /// NBPF14 /// NBPF15 /// NBPF19 /// NBPF20 /// NBPF25P /// NBPF26 /// NBPF8 /// NBPF9	chr1p36.13 /// chr1q21 /// chr1q21.1 /// chr1q21.2
243196_s_at	6.437	7.081	0.644	9.70117e-07	2.12752e-05	TRAF-type zinc finger domain containing 1	TRAFD1	chr12q
204285_s_at	6.799	7.443	0.644	0.000257673	0.00122303	phorbol-12-myristate-13-acetate-induced protein 1	PMAIP1	chr18q21.32
207156_at	5.654	6.296	0.642	0.000425239	0.00171946	histone cluster 1, H2ag	HIST1H2AG	chr6p22.1
212735_at	7.095	7.737	0.642	3.02148e-10	4.92954e-08	RUN domain and cysteine-rich domain containing, Beclin 1-interacting protein	RUBCN	chr3q29
200731_s_at	6.731	7.372	0.641	0.000245548	0.00118407	protein tyrosine phosphatase type IVA, member 1	PTP4A1	chr6q12
222250_s_at	5.616	6.257	0.641	4.23778e-09	3.53736e-07	integrator complex subunit 7	INTS7	chr1q32.3
206655_s_at	8.424	9.064	0.64	4.25453e-05	0.000359313	glycoprotein Ib (platelet), beta polypeptide /// septin 5 /// SEPT5-GP1BB readthrough	GP1BB /// SEPT5 /// SEPT5-GP1BB	chr22q11.21
217627_at	6.73	7.37	0.64	0.00018769	0.000985868	zinc finger protein 573	ZNF573	chr19q13.12
1554678_s_at	6.854	7.493	0.639	0.00389914	0.00708019	heterogeneous nuclear ribonucleoprotein D like	HNRNPDL	chr4q21.22
232829_at	7.146	7.784	0.638	1.6046e-05	0.000177755	olfactory receptor, family 52, subfamily K, member 3 pseudogene	OR52K3P	chr11p15.4
208076_at	4.949	5.586	0.637	1.59793e-05	0.000177669	histone cluster 1, H4d	HIST1H4D	chr6p22.2
216607_s_at	5.559	6.195	0.636	5.58232e-06	7.82681e-05	cytochrome P450, family 51, subfamily A, polypeptide 1 /// leucine-rich repeats and death domain containing 1	CYP51A1 /// LRRD1	chr7q21.2
231747_at	7.829	8.464	0.635	3.10009e-06	5.11986e-05	cysteinyl leukotriene receptor 1	CYSLTR1	chrXq13.2-q21.1
207655_s_at	6.543	7.178	0.635	8.66033e-06	0.000110099	B-cell linker	BLNK	chr10q23.2-q23.33
1556472_s_at	5.707	6.341	0.634	0.00017564	0.000941927	sex comb on midleg-like 4 (Drosophila)	SCML4	chr6q21
228091_at	6.141	6.774	0.633	3.06833e-07	8.94191e-06	syntaxin 17	STX17	chr9q31.1
210757_x_at	7.296	7.928	0.632	6.76996e-07	1.59167e-05	Dab, mitogen-responsive phosphoprotein, homolog 2 (Drosophila)	DAB2	chr5p13.1
217480_x_at	8.157	8.789	0.632	1.98632e-06	3.6687e-05	immunoglobulin kappa variable 1/OR1-1 (pseudogene) /// immunoglobulin kappa variable 1/OR10-1 (pseudogene) /// immunoglobulin kappa variable 1/OR2-1 (pseudogene) /// immunoglobulin kappa variable 1/OR2-118 (pseudogene)	IGKV1OR1-1 /// IGKV1OR10-1 /// IGKV1OR2-1 /// IGKV1OR2-118	chr10q11.21 /// chr1p13-q12 /// chr2p11.1
1561166_a_at	5.607	6.238	0.631	0.00171618	0.00424333	---	---	---
210606_x_at	8.178	8.807	0.629	0.000142618	0.000819034	killer cell lectin-like receptor subfamily D, member 1	KLRD1	chr12p13
232034_at	9.013	9.641	0.628	4.79047e-06	7.03728e-05	long intergenic non-protein coding RNA 537	LINC00537	chr9q21.11
225557_at	8.239	8.865	0.626	3.75469e-06	5.98079e-05	cysteine-serine-rich nuclear protein 1	CSRNP1	chr3p22
206632_s_at	5.902	6.527	0.625	0.000761227	0.00249857	apolipoprotein B mRNA editing enzyme, catalytic polypeptide-like 3B	APOBEC3B	chr22q13.1-q13.2
222067_x_at	8.171	8.795	0.624	3.84908e-05	0.000333977	histone cluster 1, H2bd	HIST1H2BD	chr6p21.3
200042_at	8.58	9.202	0.622	5.99922e-08	2.71424e-06	RNA 2',3'-cyclic phosphate and 5'-OH ligase	RTCB	chr22q12
200832_s_at	5.603	6.225	0.622	5.31379e-06	7.55857e-05	stearoyl-CoA desaturase (delta-9-desaturase)	SCD	chr10q24.31
202953_at	5.816	6.438	0.622	0.00232168	0.00511654	complement component 1, q subcomponent, B chain	C1QB	chr1p36.12
214052_x_at	6.78	7.402	0.622	0.00357732	0.00670399	proline-rich coiled-coil 2C	PRRC2C	chr1q23.3
225095_at	8.279	8.901	0.622	5.9352e-05	0.000452938	serine palmitoyltransferase, long chain base subunit 2	SPTLC2	chr14q24.3
209392_at	4.514	5.135	0.621	3.87867e-05	0.000335348	ectonucleotide pyrophosphatase/phosphodiesterase 2	ENPP2	chr8q24.1
231578_at	4.762	5.383	0.621	5.05457e-05	0.000405567	guanylate binding protein 1, interferon-inducible	GBP1	chr1p22.2
230405_at	9.579	10.2	0.621	2.01279e-08	1.20408e-06	chromosome 5 open reading frame 56	C5orf56	chr5q31.1
207314_x_at	6.632	7.252	0.62	1.32351e-05	0.000151611	killer cell immunoglobulin-like receptor, three domains, long cytoplasmic tail, 1 /// killer cell immunoglobulin-like receptor, three domains, long cytoplasmic tail, 2	KIR3DL1 /// KIR3DL2	chr19q13.4
223167_s_at	5.682	6.302	0.62	0.00271707	0.00563716	ubiquitin specific peptidase 25	USP25	chr21q11.2
204770_at	6.451	7.07	0.619	4.98041e-07	1.27992e-05	transporter 2, ATP-binding cassette, sub-family B (MDR/TAP)	TAP2	chr6p21.3
209770_at	10.19	10.809	0.619	1.76475e-08	1.10375e-06	butyrophilin, subfamily 3, member A1	BTN3A1	chr6p22.1
204162_at	4.697	5.315	0.618	0.000161559	0.000893503	NDC80 kinetochore complex component	NDC80	chr18p11.32
205495_s_at	10.463	11.081	0.618	5.09141e-05	0.000408219	granulysin	GNLY	chr2p11.2
223767_at	5.742	6.36	0.618	0.000216531	0.00108547	G protein-coupled receptor 84	GPR84	chr12q13.13
225973_at	8.751	9.369	0.618	1.15424e-06	2.39937e-05	transporter 2, ATP-binding cassette, sub-family B (MDR/TAP)	TAP2	chr6p21.3
213982_s_at	8.159	8.777	0.618	9.96669e-05	0.000644954	RAB GTPase activating protein 1-like	RABGAP1L	chr1q24
202307_s_at	10.256	10.873	0.617	2.79428e-09	2.73532e-07	transporter 1, ATP-binding cassette, sub-family B (MDR/TAP)	TAP1	chr6p21.3
202600_s_at	4.316	4.931	0.615	0.000282546	0.0012963	nuclear receptor interacting protein 1	NRIP1	chr21q11.2
34689_at	9.142	9.757	0.615	9.36559e-09	6.54855e-07	three prime repair exonuclease 1	TREX1	chr3p21.31
202599_s_at	7.11	7.724	0.614	0.000679208	0.00232179	nuclear receptor interacting protein 1	NRIP1	chr21q11.2
219885_at	5.554	6.168	0.614	0.000147347	0.000837069	schlafen family member 12	SLFN12	chr17q12
222146_s_at	5.957	6.571	0.614	5.31579e-08	2.45665e-06	transcription factor 4	TCF4	chr18q21.1
1559883_s_at	6.97	7.583	0.613	0.0018762	0.00447854	SAM domain and HD domain 1	SAMHD1	chr20pter-q12
224503_s_at	5.903	6.516	0.613	8.26726e-08	3.42389e-06	zinc finger, CCHC domain containing 2	ZCCHC2	chr18q21.33
219439_at	6.263	6.875	0.612	0.000180568	0.000958275	core 1 synthase, glycoprotein-N-acetylgalactosamine 3-beta-galactosyltransferase 1	C1GALT1	chr7p21.3
229548_at	6.887	7.498	0.611	0.00197764	0.00464246	---	---	---
221865_at	6.556	7.166	0.61	9.88072e-08	3.88302e-06	chromosome 9 open reading frame 91	C9orf91	chr9q32
203217_s_at	8.106	8.715	0.609	5.75951e-07	1.41555e-05	ST3 beta-galactoside alpha-2,3-sialyltransferase 5	ST3GAL5	chr2p11.2
210612_s_at	5.278	5.887	0.609	9.82861e-08	3.88302e-06	synaptojanin 2	SYNJ2	chr6q25.3
216853_x_at	6.669	7.278	0.609	1.73993e-05	0.000189437	immunoglobulin lambda joining 3 /// immunoglobulin lambda-like polypeptide 5 /// immunoglobulin lambda variable 3-19	IGLJ3 /// IGLL5 /// IGLV3-19	chr22q11.2 /// chr22q11.22
227066_at	7.237	7.846	0.609	2.28728e-07	7.22263e-06	MOB kinase activator 3C	MOB3C	chr1p33
1569095_at	6.91	7.518	0.608	0.000642571	0.00224067	MIR3945 host gene	MIR3945HG	---
204211_x_at	6.78	7.388	0.608	9.22283e-05	0.000610854	eukaryotic translation initiation factor 2-alpha kinase 2	EIF2AK2	chr2p22-p21
214469_at	6.011	6.619	0.608	0.000204584	0.00104554	histone cluster 1, H2ae	HIST1H2AE	chr6p22.2
213620_s_at	10.226	10.834	0.608	2.26638e-07	7.20791e-06	intercellular adhesion molecule 2	ICAM2	chr17q23.3
236301_at	6.432	7.039	0.607	0.000325963	0.00143029	IKAROS family zinc finger 3	IKZF3	chr17q21
1559263_s_at	7.396	8.002	0.606	0.0001841	0.000971748	zinc finger CCCH-type containing 12D	ZC3H12D	chr6q25.1
213016_at	6.773	7.379	0.606	2.55968e-05	0.000250003	bobby sox homolog (Drosophila)	BBX	chr3q13.1
215754_at	6.769	7.375	0.606	3.16257e-08	1.67755e-06	scavenger receptor class B, member 2	SCARB2	chr4q21.1
235014_at	5.804	6.41	0.606	0.000820473	0.00261539	ILF3 antisense RNA 1 (head to head)	ILF3-AS1	chr19p13.2
201143_s_at	6.453	7.058	0.605	0.00233047	0.00512546	eukaryotic translation initiation factor 2, subunit 1 alpha, 35kDa	EIF2S1	chr14q23.3
210873_x_at	9.315	9.919	0.604	0.000177714	0.000948251	apolipoprotein B mRNA editing enzyme, catalytic polypeptide-like 3A /// APOBEC3A and APOBEC3B deletion hybrid	APOBEC3A /// APOBEC3A_B	chr22q13 alternate reference locus /// chr22q13.1-q13.2
205306_x_at	6.343	6.947	0.604	6.91188e-05	0.000504244	kynurenine 3-monooxygenase (kynurenine 3-hydroxylase)	KMO	chr1q42-q44
208546_x_at	7.399	8.003	0.604	4.0195e-05	0.000344324	histone cluster 1, H2bh	HIST1H2BH	chr6p22.2
239277_at	7.473	8.077	0.604	4.94216e-06	7.21093e-05	---	---	---
243576_at	4.844	5.447	0.603	3.64094e-09	3.18742e-07	---	---	---
211868_x_at	6.347	6.949	0.602	0.000543419	0.0020193	immunoglobulin heavy locus /// immunoglobulin heavy constant alpha 1 /// immunoglobulin heavy constant alpha 2 (A2m marker) /// immunoglobulin heavy constant delta /// immunoglobulin heavy diversity 3-3 /// immunoglobulin heavy constant gamma 1 (G1m marker) /// immunoglobulin heavy constant gamma 2 (G2m marker) /// immunoglobulin heavy constant gamma 3 (G3m marker) /// immunoglobulin heavy joinin…	IGH /// IGHA1 /// IGHA2 /// IGHD /// IGHD3-3 /// IGHG1 /// IGHG2 /// IGHG3 /// IGHJ5 /// IGHM /// IGHV3-21 /// IGHV3-48 /// IGHV3-71 /// IGHV4-31	chr14q32.33
232521_at	7.602	8.203	0.601	0.000195328	0.00101314	proprotein convertase subtilisin/kexin type 7	PCSK7	chr11q23-q24
211267_at	4.013	4.613	0.6	4.75566e-05	0.00038765	HESX homeobox 1	HESX1	chr3p14.3
238761_at	6.258	6.858	0.6	0.000424536	0.00171946	ELK4, ETS-domain protein (SRF accessory protein 1)	ELK4	chr1q32
213891_s_at	7.111	7.71	0.599	1.68401e-05	0.000184468	transcription factor 4	TCF4	chr18q21.1
209049_s_at	7.5	8.098	0.598	1.66827e-06	3.23672e-05	zinc finger, MYND-type containing 8	ZMYND8	chr20q13.12
211012_s_at	7.387	7.985	0.598	8.88144e-08	3.59083e-06	promyelocytic leukemia	PML	chr15q22
1557236_at	4.211	4.809	0.598	0.000177028	0.000945228	apolipoprotein L, 6	APOL6	chr22q12.3
216191_s_at	7.569	8.167	0.598	0.00645737	0.00994456	T cell receptor delta variable 3	TRDV3	chr14q11
201601_x_at	12.671	13.267	0.596	1.94843e-08	1.18534e-06	interferon induced transmembrane protein 1 /// interferon induced transmembrane protein 2	IFITM1 /// IFITM2	chr11p15.5
232792_at	5.011	5.607	0.596	4.68488e-06	6.92944e-05	tripartite motif containing 69	TRIM69	chr15q21.1
204150_at	7.274	7.869	0.595	0.000118748	0.000726102	stabilin 1	STAB1	chr3p21.1
221969_at	6.494	7.088	0.594	3.12783e-05	0.000289348	paired box 5	PAX5	chr9p13
241837_at	6.792	7.386	0.594	3.78553e-07	1.0499e-05	---	---	---
1562255_at	5.313	5.906	0.593	0.00163424	0.00412126	synaptotagmin-like 3	SYTL3	chr6q25.3
225144_at	6.366	6.959	0.593	0.00189366	0.00450326	bone morphogenetic protein receptor type II	BMPR2	chr2q33-q34
205807_s_at	6.201	6.793	0.592	9.17256e-07	2.04069e-05	tuftelin 1	TUFT1	chr1q21
230645_at	7.034	7.626	0.592	2.59141e-05	0.000251614	FERM domain containing 3	FRMD3	chr9q21.32
211864_s_at	5.277	5.869	0.592	5.4163e-05	0.000426556	myoferlin	MYOF	chr10q24
230866_at	6.445	7.037	0.592	0.00044785	0.00177643	cysteinyl leukotriene receptor 1	CYSLTR1	chrXq13.2-q21.1
204043_at	7.02	7.611	0.591	4.97945e-06	7.22618e-05	transcobalamin II	TCN2	chr22q12.2
235122_at	6.101	6.691	0.59	5.6382e-06	7.87439e-05	human immunodeficiency virus type I enhancer binding protein 3	HIVEP3	chr1p34
1553103_at	6.609	7.198	0.589	1.729e-06	3.31277e-05	nuclear transcription factor, X-box binding 1	NFX1	chr9p13.3
219505_at	10.837	11.426	0.589	2.43626e-08	1.36632e-06	cat eye syndrome chromosome region, candidate 1	CECR1	chr22q11.2
228742_at	5.83	6.419	0.589	8.96006e-09	6.34743e-07	uncharacterized LOC101927008 /// uncharacterized LOC101928092	LOC101927008 /// LOC101928092	---
229074_at	6.301	6.89	0.589	2.46362e-07	7.60116e-06	EH domain containing 4	EHD4	chr15q11.1
209146_at	7.236	7.824	0.588	0.000337816	0.00146558	methylsterol monooxygenase 1	MSMO1	chr4q32-q34
212247_at	7.146	7.734	0.588	4.75662e-07	1.23717e-05	nucleoporin 205kDa	NUP205	chr7q33
212382_at	5.905	6.493	0.588	8.92232e-08	3.59083e-06	transcription factor 4	TCF4	chr18q21.1
228042_at	5.443	6.031	0.588	2.15811e-05	0.000221528	ADP-ribosylarginine hydrolase	ADPRH	chr3q13.31-q13.33
222512_at	9.48	10.068	0.588	5.46361e-09	4.26316e-07	negative regulator of ubiquitin-like proteins 1	NUB1	chr7q36
201668_x_at	7.027	7.614	0.587	0.000245092	0.00118293	myristoylated alanine-rich protein kinase C substrate	MARCKS	chr6q22.2
203820_s_at	4.686	5.272	0.586	0.000219091	0.0010961	insulin-like growth factor 2 mRNA binding protein 3	IGF2BP3	chr7p11
225755_at	8.031	8.617	0.586	6.3774e-05	0.000477215	kelch domain containing 8B	KLHDC8B	chr3p21.31
212070_at	8.811	9.396	0.585	2.86929e-05	0.000271393	adhesion G protein-coupled receptor G1	ADGRG1	chr16q21
205012_s_at	10.271	9.684	-0.587	0.000463333	0.00181357	hydroxyacylglutathione hydrolase	HAGH	chr16p13.3
201943_s_at	8.369	7.779	-0.59	0.000272228	0.00126842	carboxypeptidase D	CPD	chr17q11.2
237185_at	6.56	5.969	-0.591	3.14238e-05	0.000290196	---	---	---
236345_at	8.448	7.854	-0.594	0.000110317	0.00069228	thromboxane A synthase 1 (platelet)	TBXAS1	chr7q34-q35
240156_at	5.203	4.609	-0.594	2.05602e-08	1.22315e-06	---	---	---
217144_at	9.804	9.206	-0.598	0.00136844	0.00368564	---	---	---
229970_at	5.352	4.751	-0.601	0.00165897	0.00416595	kelch repeat and BTB (POZ) domain containing 7	KBTBD7	chr13q14.11
232459_at	5.409	4.807	-0.602	3.18322e-05	0.000293213	---	---	---
242957_at	8.028	7.426	-0.602	0.00121417	0.00339499	von Willebrand factor C and EGF domains	VWCE	chr11q12.2
212473_s_at	11.02	10.417	-0.603	3.32979e-05	0.000302828	microtubule associated monooxygenase, calponin and LIM domain containing 2	MICAL2	chr11p15.3
204140_at	6.847	6.243	-0.604	7.9997e-05	0.000555026	tyrosylprotein sulfotransferase 1	TPST1	chr7q11.21
218791_s_at	7.098	6.494	-0.604	0.00311211	0.00614501	katanin p80 subunit B-like 1	KATNBL1	chr15q14
212360_at	9.18	8.572	-0.608	3.44678e-06	5.58955e-05	adenosine monophosphate deaminase 2	AMPD2	chr1p13.3
225074_at	10.148	9.538	-0.61	0.000889046	0.00275645	RAB2B, member RAS oncogene family	RAB2B	chr14q11.2
212793_at	5.713	5.102	-0.611	0.000651535	0.00226166	dishevelled associated activator of morphogenesis 2	DAAM2	chr6p21.2
229635_at	4.891	4.28	-0.611	0.0010529	0.00308671	long intergenic non-protein coding RNA 1094	LINC01094	---
213506_at	8.075	7.463	-0.612	0.00213108	0.00485164	coagulation factor II (thrombin) receptor-like 1	F2RL1	chr5q13
211207_s_at	4.921	4.308	-0.613	0.00273355	0.00565722	acyl-CoA synthetase long-chain family member 6	ACSL6	chr5q31.1
211600_at	10.756	10.143	-0.613	0.00136928	0.00368608	protein tyrosine phosphatase, receptor type, O	PTPRO	chr12p13.3-p13.2|12p13-p12
222678_s_at	7.246	6.633	-0.613	0.000214083	0.00107671	DCN1, defective in cullin neddylation 1, domain containing 1	DCUN1D1	chr3q26.3
211546_x_at	10.199	9.585	-0.614	0.00445518	0.00773009	synuclein alpha	SNCA	chr4q21
225598_at	9.081	8.466	-0.615	3.13855e-05	0.00029009	solute carrier family 45, member 4	SLC45A4	chr8q24.3
223042_s_at	10.015	9.399	-0.616	8.07048e-06	0.000104919	FUN14 domain containing 2	FUNDC2	chrXq28
1557113_at	5.278	4.661	-0.617	0.0012695	0.00348989	uncharacterized LOC283588 /// ribosomal protein S6 kinase, 90kDa, polypeptide 5	LOC283588 /// RPS6KA5	chr14q31-q32.1 /// chr14q32.11
204187_at	10.122	9.504	-0.618	0.00562499	0.00908259	guanosine monophosphate reductase	GMPR	chr6p23
215242_at	5.81	5.191	-0.619	0.00428984	0.00754904	uncharacterized LOC102724528 /// phosphatidylinositol glycan anchor biosynthesis class C	LOC102724528 /// PIGC	chr1q23-q25
211372_s_at	9.283	8.663	-0.62	0.0010782	0.0031434	interleukin 1 receptor, type II	IL1R2	chr2q12
208694_at	7.956	7.336	-0.62	0.000179212	0.000954372	protein kinase, DNA-activated, catalytic polypeptide	PRKDC	chr8q11
222730_s_at	8.895	8.274	-0.621	0.000552699	0.00203815	zinc finger, DHHC-type containing 2	ZDHHC2	chr8p22
220306_at	7.765	7.142	-0.623	5.77772e-05	0.000446298	family with sequence similarity 46, member C	FAM46C	chr1p12
206665_s_at	7.304	6.681	-0.623	0.00119039	0.00335147	BCL2-like 1	BCL2L1	chr20q11.21
201178_at	12.117	11.494	-0.623	0.000903669	0.00278256	F-box protein 7	FBXO7	chr22q12.3
219594_at	9.418	8.794	-0.624	4.76796e-05	0.000388198	ninjurin 2	NINJ2	chr12p13
223039_at	10.243	9.618	-0.625	5.22115e-06	7.47618e-05	guanylyl cyclase domain containing 1	GUCD1	chr22q11.2
235993_at	6.788	6.159	-0.629	0.000173806	0.000937169	proteasome inhibitor subunit 1	PSMF1	chr20p13
203126_at	9.547	8.916	-0.631	5.64128e-07	1.40207e-05	inositol(myo)-1(or 4)-monophosphatase 2	IMPA2	chr18p11.2
207624_s_at	5.311	4.68	-0.631	3.15238e-06	5.18236e-05	retinitis pigmentosa GTPase regulator	RPGR	chrXp21.1
213549_at	6.962	6.33	-0.632	0.000101357	0.000653521	PDZ domain containing 8	PDZD8	chr10q26.12
210638_s_at	10.703	10.069	-0.634	3.98658e-06	6.27589e-05	F-box protein 9	FBXO9	chr6p12.3-p11.2
212055_at	9.125	8.491	-0.634	0.00498805	0.00835187	tubulin polyglutamylase complex subunit 2	TPGS2	chr18q12.2
210210_at	7.702	7.067	-0.635	2.21196e-05	0.000224876	myelin protein zero-like 1	MPZL1	chr1q24.2
226657_at	9.092	8.457	-0.635	0.000131624	0.00078089	N-acetyltransferase domain containing 1	NATD1	chr17p11.2
209273_s_at	9.049	8.412	-0.637	3.47208e-05	0.000310964	iron-sulfur cluster assembly 1	ISCA1	chr9q21.33
224905_at	9.298	8.661	-0.637	7.0664e-05	0.000510673	WD repeat domain 26	WDR26	chr1q42.13
235626_at	8.121	7.484	-0.637	4.9227e-07	1.27116e-05	calcium/calmodulin-dependent protein kinase ID	CAMK1D	chr10p13
202201_at	11.505	10.867	-0.638	1.14571e-05	0.000136621	biliverdin reductase B	BLVRB	chr19q13.1-q13.2
212479_s_at	8.443	7.803	-0.64	0.000114129	0.000707504	required for meiotic nuclear division 5 homolog A	RMND5A	chr2p11.2
225716_at	7.498	6.858	-0.64	0.000272714	0.00126895	BRI3 binding protein	BRI3BP	chr12q24.31
225337_at	9.763	9.121	-0.642	7.64592e-09	5.66868e-07	abhydrolase domain containing 2	ABHD2	chr15q26.1
229617_x_at	7.962	7.32	-0.642	0.000367396	0.00155323	adaptor-related protein complex 2, alpha 1 subunit	AP2A1	chr19q13.33
204635_at	7.915	7.273	-0.642	4.81087e-06	7.05762e-05	ribosomal protein S6 kinase, 90kDa, polypeptide 5	RPS6KA5	chr14q31-q32.1
224327_s_at	9.758	9.115	-0.643	3.00608e-05	0.000281118	diacylglycerol O-acyltransferase 2	DGAT2	chr11q13.5
219434_at	10.265	9.618	-0.647	9.00178e-05	0.000600559	triggering receptor expressed on myeloid cells 1	TREM1	chr6p21.1
224836_at	7.339	6.692	-0.647	8.72593e-06	0.000110616	tumor protein p53 inducible nuclear protein 2	TP53INP2	chr20q11.22
230778_at	6.371	5.723	-0.648	0.000175529	0.000941927	---	---	---
218872_at	10.057	9.408	-0.649	0.000731783	0.00244107	tescalcin	TESC	chr12q24.22
214157_at	8.022	7.372	-0.65	0.00576564	0.00921794	GNAS complex locus	GNAS	chr20q13.3
227236_at	7.904	7.254	-0.65	5.70248e-05	0.000443348	tetraspanin 2	TSPAN2	chr1p13.2
215438_x_at	11.339	10.686	-0.653	0.000387038	0.00161472	G1 to S phase transition 1	GSPT1	chr16p13.1
228775_at	8.362	7.707	-0.655	2.09073e-05	0.000217725	ER membrane protein complex subunit 3	EMC3	chr3p25.3
236260_at	7.13	6.471	-0.659	0.000182296	0.000964747	uncharacterized LOC105371074	LOC105371074	---
203116_s_at	9.53	8.87	-0.66	0.00557869	0.00903687	ferrochelatase	FECH	chr18q21.3
219672_at	10.552	9.89	-0.662	0.00430487	0.00755819	alpha hemoglobin stabilizing protein	AHSP	chr16p11.2
203966_s_at	11.368	10.706	-0.662	1.08268e-05	0.000130645	protein phosphatase, Mg2+/Mn2+ dependent, 1A	PPM1A	chr14q23.1
214974_x_at	5.509	4.846	-0.663	0.00357387	0.0066997	chemokine (C-X-C motif) ligand 5	CXCL5	chr4q13.3
207536_s_at	6.32	5.656	-0.664	6.20784e-06	8.45074e-05	tumor necrosis factor receptor superfamily, member 9	TNFRSF9	chr1p36
203485_at	7.15	6.485	-0.665	5.88272e-05	0.000451432	reticulon 1	RTN1	chr14q23.1
227855_at	5.808	5.143	-0.665	3.77656e-05	0.000330884	Rho guanine nucleotide exchange factor (GEF) 40	ARHGEF40	chr14q11.2
212472_at	9.287	8.621	-0.666	2.03976e-05	0.000213349	microtubule associated monooxygenase, calponin and LIM domain containing 2	MICAL2	chr11p15.3
203888_at	6.555	5.888	-0.667	6.08603e-05	0.000461929	thrombomodulin	THBD	chr20p11.2
215037_s_at	7.494	6.827	-0.667	0.000945649	0.00287078	BCL2-like 1	BCL2L1	chr20q11.21
205539_at	5.851	5.183	-0.668	3.42454e-05	0.000307549	advillin	AVIL	chr12q14.1
217748_at	11.984	11.31	-0.674	0.00145458	0.00383421	adiponectin receptor 1	ADIPOR1	chr1q32.1
209845_at	10.97	10.293	-0.677	1.63198e-06	3.18351e-05	makorin ring finger protein 1	MKRN1	chr7q34
205403_at	10.31	9.632	-0.678	0.000175322	0.000941927	interleukin 1 receptor, type II	IL1R2	chr2q12
226064_s_at	9.414	8.729	-0.685	5.25307e-05	0.000418342	diacylglycerol O-acyltransferase 2	DGAT2	chr11q13.5
226959_at	8.911	8.223	-0.688	5.71354e-07	1.41432e-05	calcium/calmodulin-dependent protein kinase ID	CAMK1D	chr10p13
210112_at	8.514	7.825	-0.689	0.000415133	0.00169252	Hermansky-Pudlak syndrome 1	HPS1	chr10q23.1-q23.3
202129_s_at	9.249	8.56	-0.689	0.000225401	0.00111693	RIO kinase 3	RIOK3	chr18q11.2
203115_at	8.361	7.671	-0.69	0.00467597	0.00798704	ferrochelatase	FECH	chr18q21.3
231933_at	7.315	6.625	-0.69	8.42416e-06	0.000108246	membrane associated ring finger 8	2019-03-08	chr10q11.21
220246_at	7.366	6.673	-0.693	2.34055e-05	0.000232928	calcium/calmodulin-dependent protein kinase ID	CAMK1D	chr10p13
1553976_a_at	7.109	6.414	-0.695	1.44087e-05	0.000163317	deleted in primary ciliary dyskinesia homolog (mouse)	DPCD	chr10q24.32
202131_s_at	9.451	8.755	-0.696	0.000103554	0.000663632	RIO kinase 3	RIOK3	chr18q11.2
203627_at	6.986	6.29	-0.696	9.48904e-06	0.000117591	insulin-like growth factor 1 receptor	IGF1R	chr15q26.3
227889_at	8.777	8.071	-0.706	0.000712999	0.00239403	lysophosphatidylcholine acyltransferase 2	LPCAT2	chr16q12.2
227425_at	7.385	6.678	-0.707	0.000374154	0.001575	RALBP1 associated Eps domain containing 2	REPS2	chrXp22.2
201161_s_at	12.332	11.625	-0.707	0.00191971	0.00454877	Y box binding protein 3	YBX3	chr12p13.1
223012_at	11.264	10.556	-0.708	0.000278337	0.00128311	UBX domain protein 6	UBXN6	chr19p13
241525_at	5.822	5.111	-0.711	2.8538e-06	4.82409e-05	uncharacterized LOC200772	LOC200772	chr2q37.3
225800_at	9.86	9.148	-0.712	0.00128048	0.00351012	JAZF zinc finger 1	JAZF1	chr7p15.2-p15.1
218847_at	10.362	9.647	-0.715	0.00287885	0.00583128	insulin-like growth factor 2 mRNA binding protein 2	IGF2BP2	chr3q27.2
202468_s_at	6.968	6.244	-0.724	0.000566984	0.00206506	catenin (cadherin-associated protein), alpha-like 1	CTNNAL1	chr9q31.2
221747_at	7.641	6.917	-0.724	0.000723634	0.00242214	tensin 1	TNS1	chr2q35-q36
226811_at	10.545	9.817	-0.728	0.00263317	0.00552811	family with sequence similarity 46, member C	FAM46C	chr1p12
219714_s_at	7.093	6.361	-0.732	1.93743e-05	0.000205338	calcium channel, voltage-dependent, alpha 2/delta subunit 3	CACNA2D3	chr3p21.1
221932_s_at	11.675	10.943	-0.732	8.58816e-05	0.000581613	glutaredoxin 5	GLRX5	chr14q32.13
206207_at	10.905	10.17	-0.735	0.00335586	0.00645048	Charcot-Leyden crystal galectin	CLC	chr19q13.1
223432_at	7.982	7.247	-0.735	0.000230689	0.00113478	oxysterol binding protein 2	OSBP2	chr22q12.2
218644_at	8.653	7.914	-0.739	0.000116013	0.000715473	pleckstrin 2	PLEK2	chr14q23.3
209185_s_at	9.834	9.093	-0.741	0.000317611	0.00140049	insulin receptor substrate 2	IRS2	chr13q34
215684_s_at	9.696	8.951	-0.745	0.000567781	0.00206681	activating signal cointegrator 1 complex subunit 2	ASCC2	chr22q12.1
202083_s_at	9.865	9.118	-0.747	1.16158e-05	0.000138055	SEC14-like lipid binding 1	SEC14L1	chr17q25.2
222528_s_at	10.872	10.125	-0.747	0.00044086	0.00175755	solute carrier family 25 (mitochondrial iron transporter), member 37	SLC25A37	chr8p21.2
229967_at	11.72	10.966	-0.754	2.35857e-05	0.000233857	CKLF-like MARVEL transmembrane domain containing 2	CMTM2	chr16q21
202947_s_at	11.995	11.24	-0.755	0.00112126	0.00321876	glycophorin C (Gerbich blood group)	GYPC	chr2q14-q21
226817_at	8.809	8.054	-0.755	0.000206188	0.0010492	desmocollin 2	DSC2	chr18q12.1
226430_at	10.372	9.616	-0.756	3.37643e-09	3.06893e-07	RELT-like 1	RELL1	chr4p14
1569206_at	7.18	6.422	-0.758	2.85355e-06	4.82409e-05	t-complex 11, testis-specific-like 2	TCP11L2	chr12q23.3
1553861_at	4.901	4.142	-0.759	4.36893e-05	0.000365501	t-complex 11, testis-specific-like 2	TCP11L2	chr12q23.3
203021_at	8.744	7.985	-0.759	2.87072e-05	0.000271393	secretory leukocyte peptidase inhibitor	SLPI	chr20q12
1552583_s_at	7.024	6.265	-0.759	0.00312324	0.00615497	ATP binding cassette subfamily C member 13, pseudogene	ABCC13	chr21q11.2
221425_s_at	7.639	6.878	-0.761	6.85158e-05	0.000500863	iron-sulfur cluster assembly 1	ISCA1	chr9q21.33
205900_at	9.268	8.501	-0.767	0.00625686	0.00976707	keratin 1, type II	KRT1	chr12q13.13
230585_at	8.556	7.782	-0.774	0.000548794	0.0020288	potassium channel, inwardly rectifying subfamily J, member 15	KCNJ15	chr21q22.2
217202_s_at	10.019	9.243	-0.776	4.21789e-06	6.53493e-05	glutamate-ammonia ligase	GLUL	chr1q31
1554786_at	6.925	6.141	-0.784	0.000196116	0.00101504	Cas scaffolding protein family member 4	CASS4	chr20q13.31
203887_s_at	7.687	6.897	-0.79	0.000358407	0.00152301	thrombomodulin	THBD	chr20p11.2
210504_at	8.322	7.529	-0.793	0.00315639	0.00619371	Kruppel-like factor 1 (erythroid)	KLF1	chr19p13.2
233371_at	7.821	7.023	-0.798	0.00391587	0.007101	ATP binding cassette subfamily C member 13, pseudogene	ABCC13	chr21q11.2
230720_at	5.429	4.63	-0.799	0.00102392	0.00303901	ring finger protein 182	RNF182	chr6p23
209875_s_at	5.131	4.331	-0.8	0.00030173	0.00135617	secreted phosphoprotein 1	SPP1	chr4q22.1
204507_s_at	7.69	6.889	-0.801	4.55863e-05	0.000376722	protein phosphatase 3, regulatory subunit B, alpha	PPP3R1	chr2p15
1558397_at	7.986	7.179	-0.807	2.98849e-06	4.97368e-05	platelet/endothelial cell adhesion molecule 1	PECAM1	chr17q23.3
221824_s_at	10.741	9.933	-0.808	7.39358e-05	0.000525501	membrane associated ring finger 8	2019-03-08	chr10q11.21
223412_at	7.286	6.478	-0.808	6.80392e-05	0.000497717	kelch repeat and BTB (POZ) domain containing 7	KBTBD7	chr13q14.11
226179_at	12.03	11.217	-0.813	7.40169e-06	9.75528e-05	solute carrier family 25 (mitochondrial iron transporter), member 37	SLC25A37	chr8p21.2
222453_at	7.344	6.531	-0.813	4.65675e-05	0.000382191	cytochrome b reductase 1	CYBRD1	chr2q31.1
226248_s_at	8.058	7.239	-0.819	4.57714e-06	6.83582e-05	KIAA1324	KIAA1324	chr1p13.3
201333_s_at	6.857	6.037	-0.82	5.15611e-05	0.000412485	Rho guanine nucleotide exchange factor (GEF) 12	ARHGEF12	chr11q23.3
1552713_a_at	6.749	5.926	-0.823	0.00108332	0.00315528	solute carrier family 4 (anion exchanger), member 1 (Diego blood group)	SLC4A1	chr17q21.31
202364_at	11.914	11.091	-0.823	2.03775e-05	0.000213349	MAX interactor 1, dimerization protein	MXI1	chr10q24-q25
200648_s_at	10.405	9.581	-0.824	1.71855e-05	0.000187679	glutamate-ammonia ligase	GLUL	chr1q31
229608_at	8.074	7.246	-0.828	2.55369e-06	4.46725e-05	family with sequence similarity 212, member B /// uncharacterized LOC101928718	FAM212B /// LOC101928718	chr1p13.2
224789_at	11.675	10.843	-0.832	7.40073e-05	0.000525662	DDB1 and CUL4 associated factor 12	DCAF12	chr9p13.3
204466_s_at	12.126	11.292	-0.834	0.00237181	0.0051804	synuclein alpha	SNCA	chr4q21
213608_s_at	9.084	8.237	-0.847	2.32668e-06	4.18255e-05	SRR1 domain containing	SRRD	chr22q12.1
224693_at	9.766	8.919	-0.847	0.000684434	0.00233078	family with sequence similarity 210, member B	FAM210B	chr20q13.2
241631_at	5.922	5.072	-0.85	5.89551e-05	0.000451432	Rho guanine nucleotide exchange factor (GEF) 40	ARHGEF40	chr14q11.2
205856_at	7.072	6.221	-0.851	0.00184994	0.00444542	solute carrier family 14 (urea transporter), member 1 (Kidd blood group)	SLC14A1	chr18q11-q12
220326_s_at	8.483	7.627	-0.856	2.56388e-06	4.46725e-05	Rho guanine nucleotide exchange factor (GEF) 40	ARHGEF40	chr14q11.2
242335_at	10.811	9.954	-0.857	1.05505e-05	0.000128296	solute carrier family 25 (mitochondrial iron transporter), member 37	SLC25A37	chr8p21.2
222745_s_at	7.514	6.644	-0.87	0.000194134	0.0010084	katanin p80 subunit B-like 1	KATNBL1	chr15q14
226872_at	6.604	5.733	-0.871	2.3949e-06	4.29085e-05	regulatory factor X, 2 (influences HLA class II expression)	RFX2	chr19p13.3
229498_at	9.739	8.864	-0.875	0.000134415	0.000791375	muscleblind-like splicing regulator 3	MBNL3	chrXq26.2
229789_at	7.221	6.343	-0.878	1.20026e-07	4.42613e-06	tigger transposable element derived 3	TIGD3	chr11q13.1
214433_s_at	10.529	9.645	-0.884	0.00425994	0.00751854	selenium binding protein 1	SELENBP1	chr1q21.3
1565525_a_at	6.543	5.658	-0.885	4.35554e-06	6.66193e-05	t-complex 11, testis-specific-like 2	TCP11L2	chr12q23.3
224690_at	11.685	10.8	-0.885	0.000206735	0.00105054	family with sequence similarity 210, member B	FAM210B	chr20q13.2
226382_at	8.872	7.987	-0.885	7.40715e-08	3.15255e-06	calcium/calmodulin-dependent protein kinase ID	CAMK1D	chr10p13
225387_at	8.92	8.028	-0.892	7.23882e-05	0.000518608	tetraspanin 5	TSPAN5	chr4q23
58780_s_at	8.839	7.939	-0.9	1.06119e-06	2.26355e-05	Rho guanine nucleotide exchange factor (GEF) 40	ARHGEF40	chr14q11.2
201912_s_at	10.934	10.033	-0.901	0.000256194	0.00121957	G1 to S phase transition 1	GSPT1	chr16p13.1
203628_at	7.858	6.949	-0.909	8.54563e-07	1.92507e-05	insulin-like growth factor 1 receptor	IGF1R	chr15q26.3
205570_at	8.942	8.029	-0.913	6.7344e-05	0.000494985	phosphatidylinositol-5-phosphate 4-kinase, type II, alpha	PIP4K2A	chr10p12.2
226905_at	11.283	10.368	-0.915	4.99639e-09	4.01497e-07	family with sequence similarity 101, member B	FAM101B	chr17p13
217889_s_at	6.498	5.581	-0.917	1.00606e-05	0.000123385	cytochrome b reductase 1	CYBRD1	chr2q31.1
225388_at	8.251	7.334	-0.917	2.01614e-05	0.000211801	tetraspanin 5	TSPAN5	chr4q23
1554481_a_at	8.402	7.478	-0.924	3.14577e-07	9.13027e-06	erythrocyte membrane protein band 4.1	EPB41	chr1p33-p32
201052_s_at	10.416	9.49	-0.926	2.21579e-05	0.000224876	proteasome inhibitor subunit 1	PSMF1	chr20p13
223124_s_at	10.633	9.704	-0.929	1.56547e-06	3.08733e-05	PITH (C-terminal proteasome-interacting domain of thioredoxin-like) domain containing 1	PITHD1	chr1p36.11
201875_s_at	8.251	7.298	-0.953	3.37592e-08	1.78194e-06	myelin protein zero-like 1	MPZL1	chr1q24.2
201874_at	8.418	7.463	-0.955	3.2751e-07	9.37924e-06	myelin protein zero-like 1	MPZL1	chr1q24.2
236081_at	7.241	6.286	-0.955	0.00236964	0.00517726	synuclein alpha	SNCA	chr4q21
205040_at	7.406	6.436	-0.97	5.89823e-05	0.000451432	orosomucoid 1	ORM1	chr9q32
225330_at	7.982	7.01	-0.972	5.78423e-07	1.41555e-05	insulin-like growth factor 1 receptor	IGF1R	chr15q26.3
210724_at	8.957	7.984	-0.973	6.5538e-05	0.000485689	adhesion G protein-coupled receptor E3	ADGRE3	chr19p13.1
228770_at	7.421	6.444	-0.977	0.000352437	0.00150655	G protein-coupled receptor 146	GPR146	chr7p22.3
223266_at	11.923	10.916	-1.007	0.000222774	0.00110799	STE20-related kinase adaptor beta	STRADB	chr2q33.1
206303_s_at	9.297	8.288	-1.009	5.51499e-05	0.000432519	nudix hydrolase 4 /// nudix hydrolase 4 pseudogene 1 /// nudix hydrolase 4 pseudogene 2	NUDT4 /// NUDT4P1 /// NUDT4P2	chr12q21 /// chr1p12-p13 /// chr1q21.1
221748_s_at	9	7.991	-1.009	0.000434234	0.00174145	tensin 1	TNS1	chr2q35-q36
206637_at	7.152	6.139	-1.013	0.000288938	0.0013161	purinergic receptor P2Y, G-protein coupled, 14	P2RY14	chr3q24-q25.1
205227_at	7.115	6.101	-1.014	1.47072e-05	0.00016635	interleukin 1 receptor accessory protein	IL1RAP	chr3q28
204141_at	9.668	8.643	-1.025	0.000135795	0.00079469	tubulin, beta 2A class IIa	TUBB2A	chr6p25
241627_x_at	8.397	7.359	-1.038	2.26923e-07	7.20791e-06	Rho guanine nucleotide exchange factor (GEF) 40	ARHGEF40	chr14q11.2
219814_at	7.537	6.474	-1.063	0.000342545	0.00147788	muscleblind-like splicing regulator 3	MBNL3	chrXq26.2
235683_at	9.418	8.345	-1.073	0.000561106	0.00205159	sestrin 3	SESN3	chr11q21
202387_at	11.02	9.941	-1.079	1.91166e-07	6.35326e-06	BCL2-associated athanogene	BAG1	chr9p12
204467_s_at	9.594	8.508	-1.086	0.000316251	0.00139708	synuclein alpha	SNCA	chr4q21
211475_s_at	11.051	9.926	-1.125	1.18782e-07	4.4052e-06	BCL2-associated athanogene	BAG1	chr9p12
244065_at	5.201	4.075	-1.126	5.77505e-07	1.41555e-05	contactin associated protein-like 3 /// contactin associated protein-like 3B /// contactin associated protein-like 3-like	CNTNAP3 /// CNTNAP3B /// LOC100289279	chr9p11.2 /// chr9p13.1
209395_at	9.566	8.435	-1.131	0.000739741	0.00245544	chitinase 3-like 1 (cartilage glycoprotein-39)	CHI3L1	chr1q32.1
1556283_s_at	8.287	7.129	-1.158	1.2604e-06	2.57042e-05	FGFR1 oncogene partner 2	FGFR1OP2	chr12p11.23
220173_at	6.529	5.346	-1.183	7.44419e-05	0.000528312	basal body orientation factor 1	BBOF1	chr14q24.3
205592_at	11.249	10.058	-1.191	7.37121e-05	0.000525116	solute carrier family 4 (anion exchanger), member 1 (Diego blood group)	SLC4A1	chr17q21.31
209396_s_at	9.087	7.89	-1.197	0.000172562	0.000933732	chitinase 3-like 1 (cartilage glycoprotein-39)	CHI3L1	chr1q32.1
206302_s_at	9.223	8.024	-1.199	1.57178e-05	0.000175751	nudix hydrolase 4 /// nudix hydrolase 4 pseudogene 1 /// nudix hydrolase 4 pseudogene 2	NUDT4 /// NUDT4P1 /// NUDT4P2	chr12q21 /// chr1p12-p13 /// chr1q21.1
205624_at	6.765	5.553	-1.212	5.02645e-05	0.000403913	carboxypeptidase A3 (mast cell)	CPA3	chr3q24
209890_at	10.303	9.063	-1.24	2.45737e-06	4.36646e-05	tetraspanin 5	TSPAN5	chr4q23
210746_s_at	10.448	9.177	-1.271	4.1962e-05	0.000355782	erythrocyte membrane protein band 4.2	EPB42	chr15q15-q21
230354_at	7.366	6.076	-1.29	2.96525e-06	4.95031e-05	---	---	---
227250_at	7.529	6.237	-1.292	1.96389e-06	3.63976e-05	kringle containing transmembrane protein 1	KREMEN1	chr22q12.1
205041_s_at	7.866	6.568	-1.298	0.000212853	0.00107202	orosomucoid 1 /// orosomucoid 2	ORM1 /// ORM2	chr9q32
223796_at	5.791	4.432	-1.359	4.40769e-07	1.16613e-05	contactin associated protein-like 3 /// contactin associated protein-like 3B /// contactin associated protein-like 3 pseudogene 2 /// contactin associated protein-like 3-like /// contactin-associated protein-like 3B	CNTNAP3 /// CNTNAP3B /// CNTNAP3P2 /// LOC100289279 /// LOC105369234	chr9p11.2 /// chr9p13.1 /// chr9q12
218864_at	8.431	7.067	-1.364	4.69898e-06	6.94076e-05	tensin 1	TNS1	chr2q35-q36
211734_s_at	7.71	6.234	-1.476	3.07522e-06	5.08658e-05	Fc fragment of IgE, high affinity I, receptor for; alpha polypeptide	FCER1A	chr1q23
203691_at	9.724	8.195	-1.529	1.77201e-05	0.00019196	peptidase inhibitor 3, skin-derived	PI3	chr20q13.12
41469_at	9.611	7.908	-1.703	1.25136e-05	0.000145987	peptidase inhibitor 3, skin-derived	PI3	chr20q13.12
241881_at	8.53	6.677	-1.853	9.31409e-07	2.05519e-05	tripartite motif containing 58	TRIM58	chr1q44
1553589_a_at	10.137	8.237	-1.9	8.61996e-08	3.51587e-06	PDZK1 interacting protein 1	PDZK1IP1	chr1p33
219630_at	10.497	8.596	-1.901	1.1454e-07	4.29742e-06	PDZK1 interacting protein 1	PDZK1IP1	chr1p33

## Sheet: Tumor_D22_vs_baseline
Gene.Symbol	Baseline avg	Post-dose (Day 22) avg	log2 fold change	p value	FDR (q value)
APOBEC3A	-0.093	2.209	2.302	0.00688263	0.705144
EIF3CL	1.038	3.009	1.971	0.0243371	0.705144
RSAD2	2.419	4.092	1.673	0.033923	0.705144
CXCR2P1	-0.289	1.37	1.659	0.043573	0.705144
LAG3	0.997	2.535	1.538	0.0302479	0.705144
RUFY4	-0.331	1.189	1.52	0.0159995	0.705144
OTOF	-1.32	0.192	1.512	0.0118813	0.705144
MX1	4.716	6.221	1.505	0.0423137	0.705144
CHI3L1	3.288	4.784	1.496	0.0351283	0.705144
IFI27	8.159	9.62	1.461	0.0452362	0.705144
NPW	1.254	2.701	1.447	0.0248613	0.705144
MT1H	0.578	1.984	1.406	0.0319544	0.705144
OAS1	4.702	6.061	1.359	0.0456337	0.705144
OAS2	4.208	5.547	1.339	0.0435392	0.705144
SLC1A6	-2.178	-0.84	1.338	0.045721	0.705144
KLHDC7B	0.962	2.277	1.315	0.0154874	0.705144
XAF1	5.033	6.328	1.295	0.0489677	0.705144
ODF3B	3.898	5.172	1.274	0.0114146	0.705144
MUC15	-1.059	0.204	1.263	0.048834	0.705144
CCR7	-0.114	1.107	1.221	0.0358971	0.705144
SNORA29	-2.143	-0.93	1.213	0.0413896	0.705144
LOC102724484	-2.228	-1.028	1.2	0.00660235	0.705144
IRX4	0.32	1.489	1.169	0.0258458	0.705144
SERPINF2	1.295	2.462	1.167	0.0203402	0.705144
BCL2L14	-1.04	0.124	1.164	0.011301	0.705144
CAMSAP3	1.708	2.872	1.164	0.0218247	0.705144
ETV7	2.144	3.306	1.162	0.0229073	0.705144
BLOC1S5-TXNDC5	-1.382	-0.244	1.138	0.0382684	0.705144
TYMP	6.681	7.8	1.119	0.0194491	0.705144
MST1L	-0.239	0.872	1.111	0.0152169	0.705144
KLHL31	-0.342	0.734	1.076	0.0370674	0.705144
P2RX5	0.167	1.23	1.063	0.0175622	0.705144
PATL2	0.204	1.261	1.057	0.00926248	0.705144
MYH14	2.558	3.614	1.056	0.0441081	0.705144
TRIM74	-1.289	-0.238	1.051	0.0319971	0.705144
TNNT2	0.856	1.904	1.048	0.0229869	0.705144
TXK	-0.709	0.338	1.047	0.0159054	0.705144
GAS6-AS1	-0.082	0.963	1.045	0.0122703	0.705144
POU2AF1	-0.415	0.629	1.044	0.0187637	0.705144
JSRP1	0.813	1.854	1.041	0.0416589	0.705144
APOBEC3A_B	-2.229	-1.192	1.037	0.0438529	0.705144
LGALS3BP	7.311	8.341	1.03	0.0222281	0.705144
MMP10	-0.189	0.841	1.03	0.0426003	0.705144
CYGB	2.453	3.482	1.029	0.025058	0.705144
EXOC3L4	0.535	1.555	1.02	0.0381703	0.705144
TGIF2-C20orf24	-1.161	-0.15	1.011	0.025037	0.705144
CCL27	-1.689	-0.686	1.003	0.046652	0.705144
IRF7	4.653	5.643	0.99	0.02795	0.705144
C19orf66	4.222	5.211	0.989	0.0311909	0.705144
LOC440896	-1.616	-0.629	0.987	0.0270174	0.705144
CD164L2	-0.417	0.568	0.985	0.00841339	0.705144
C20orf141	-2.027	-1.044	0.983	0.0413442	0.705144
CES4A	1.281	2.264	0.983	0.0310026	0.705144
CES3	-0.16	0.815	0.975	0.0432578	0.705144
REC8	3.202	4.176	0.974	0.0154785	0.705144
MUC5B	-1.493	-0.524	0.969	0.0363327	0.705144
LY6E	8.051	9.02	0.969	0.0499352	0.705144
ZNF750	0.513	1.461	0.948	0.0291785	0.705144
ZNF334	0.548	1.495	0.947	0.0256477	0.705144
MIATNB	-0.15	0.794	0.944	0.00783165	0.705144
C4orf19	-0.495	0.445	0.94	0.0208745	0.705144
TNFRSF10C	-0.716	0.215	0.931	0.0460609	0.705144
MATN1-AS1	0.092	1.015	0.923	0.00494668	0.705144
PLAG1	0.51	1.428	0.918	0.0201766	0.705144
LOC100288152	2.712	3.627	0.915	0.00430497	0.705144
SAA2-SAA4	-1.358	-0.448	0.91	0.0441139	0.705144
MYH3	1.039	1.948	0.909	0.0190226	0.705144
NNAT	2.406	3.311	0.905	0.00695022	0.705144
PRKXP1	0.059	0.964	0.905	0.0096936	0.705144
COLEC11	0.942	1.843	0.901	0.0141482	0.705144
DHX58	3.141	4.042	0.901	0.0377356	0.705144
GJB5	0.671	1.569	0.898	0.035703	0.705144
SLC1A3	2.439	3.335	0.896	0.00761822	0.705144
LSP1	4.716	5.603	0.887	0.0231563	0.705144
SMIM5	0.561	1.442	0.881	0.0295406	0.705144
RNF43	1.009	1.886	0.877	0.0174095	0.705144
GP1BA	-1.407	-0.532	0.875	0.0183316	0.705144
ABHD14A-ACY1	-1.792	-0.919	0.873	0.0448266	0.705144
LOC283710	-1.554	-0.682	0.872	0.034736	0.705144
GPT	0.922	1.792	0.87	0.0232298	0.705144
MEFV	-1.418	-0.553	0.865	0.0381137	0.705144
MST1	2.892	3.755	0.863	0.0167897	0.705144
FAT2	0.408	1.27	0.862	0.0277991	0.705144
DOK7	0.53	1.387	0.857	0.00987346	0.705144
PDE6B	-0.129	0.727	0.856	0.0121386	0.705144
HESX1	0.686	1.539	0.853	0.0384998	0.705144
TH	-0.307	0.543	0.85	0.028154	0.705144
PLD4	-0.576	0.269	0.845	0.0473763	0.705144
LGALS4	-0.611	0.232	0.843	0.0489832	0.705144
DDN	-0.598	0.244	0.842	0.0357166	0.705144
FBLL1	-0.744	0.098	0.842	0.044476	0.705144
PLEKHG6	1.154	1.989	0.835	0.026906	0.705144
LBHD1	2.108	2.939	0.831	0.011451	0.705144
FOXD4L6	-1.901	-1.072	0.829	0.040079	0.705144
OR10AD1	-2.039	-1.222	0.817	0.0436956	0.705144
FCGBP	0.772	1.575	0.803	0.0414325	0.705144
CD160	-0.648	0.154	0.802	0.046336	0.705144
AGBL2	-1.014	-0.214	0.8	0.00448602	0.705144
ABCC6P1	-1.496	-0.697	0.799	0.049073	0.705144
NEU4	-1.326	-0.529	0.797	0.0378714	0.705144
PARP12	4.436	5.229	0.793	0.0468831	0.705144
IZUMO4	1.394	2.186	0.792	0.00247019	0.705144
TOP1P1	-0.36	0.431	0.791	0.00669966	0.705144
BCRP3	0.146	0.935	0.789	0.0143488	0.705144
OAF	4.426	5.214	0.788	0.0116841	0.705144
HOTS	0.076	0.863	0.787	0.0402419	0.705144
EPHX3	-0.475	0.304	0.779	0.0118292	0.705144
FBXO24	-0.999	-0.22	0.779	0.00805632	0.705144
MATK	1.109	1.886	0.777	0.0492917	0.705144
HMX1	-2.054	-1.285	0.769	0.0257881	0.705144
LOC100287728	-2.083	-1.315	0.768	0.0385232	0.705144
OR2A4	0.541	1.309	0.768	0.0493781	0.705144
PROZ	-1.797	-1.03	0.767	0.0463373	0.705144
HELZ2	3.253	4.018	0.765	0.0435229	0.705144
PHYHD1	2.51	3.275	0.765	0.026519	0.705144
FAM13A-AS1	0.906	1.664	0.758	0.020333	0.705144
LOC729739	-2.137	-1.383	0.754	0.0489728	0.705144
TCONS_00029157	-0.444	0.31	0.754	0.00173673	0.705144
EPHX2	2.568	3.321	0.753	0.0331541	0.705144
ADGRG5	-0.758	-0.006	0.752	0.0367266	0.705144
NPPA	-0.863	-0.111	0.752	0.0200522	0.705144
NKPD1	-1.221	-0.47	0.751	0.0263681	0.705144
LINC00993	-2.322	-1.578	0.744	0.0316144	0.705144
TRIM69	0.227	0.968	0.741	0.0330495	0.705144
ASMTL-AS1	3.067	3.807	0.74	0.0277578	0.705144
LRRC43	-1.144	-0.411	0.733	0.0424002	0.705144
AMPD3	2.377	3.109	0.732	0.0367886	0.705144
EGFR-AS1	-1.687	-0.957	0.73	0.0141984	0.705144
LOC100131626	-1.815	-1.086	0.729	0.0122322	0.705144
TAPBP	6.054	6.776	0.722	0.00700259	0.705144
FAM186B	-1.041	-0.32	0.721	0.00299093	0.705144
ST8SIA5	-1.487	-0.766	0.721	0.0357428	0.705144
LOC100506860	-0.563	0.157	0.72	0.028346	0.705144
ARSA	3.498	4.216	0.718	0.00083296	0.705144
LINC00910	-0.329	0.389	0.718	0.00238822	0.705144
ALOX12	-1.415	-0.698	0.717	0.0196348	0.705144
ERAS	-1.777	-1.06	0.717	0.0172574	0.705144
FLT3	-2.022	-1.305	0.717	0.0215301	0.705144
KTN1-AS1	-0.279	0.437	0.716	0.0157987	0.705144
SPATA18	0.748	1.463	0.715	0.0418733	0.705144
BAIAP2	4.351	5.065	0.714	0.0244717	0.705144
CDK18	3.806	4.519	0.713	0.0289289	0.705144
RNF213	4.544	5.254	0.71	0.04198	0.705144
RTN4RL1	0.825	1.535	0.71	0.039153	0.705144
SDK2	-0.985	-0.275	0.71	0.02349	0.705144
FLJ31104	-2.074	-1.365	0.709	0.0160744	0.705144
SEMA4D	3.16	3.868	0.708	0.00151538	0.705144
RAPGEFL1	2.941	3.646	0.705	0.0182976	0.705144
SLC25A45	1.96	2.665	0.705	0.00710386	0.705144
CFAP70	0.387	1.084	0.697	0.0271814	0.705144
LINC01503	2.81	3.507	0.697	0.0376891	0.705144
C20orf195	-0.691	0.005	0.696	0.0425734	0.705144
ATP11A-AS1	-2.068	-1.373	0.695	0.0306848	0.705144
MIRLET7BHG	1.796	2.49	0.694	0.00468775	0.705144
RNF212	0.059	0.753	0.694	0.0140152	0.705144
RIC3	-0.404	0.289	0.693	0.0410911	0.705144
TSPAN7	2.856	3.549	0.693	0.0198289	0.705144
LOC100506388	-1.077	-0.387	0.69	0.0467193	0.705144
ANKK1	-1.179	-0.49	0.689	0.00438977	0.705144
KIRREL3	-1.437	-0.751	0.686	0.0449889	0.705144
HOXB8	-0.923	-0.238	0.685	0.0394825	0.705144
TLL2	-1.795	-1.112	0.683	0.00878976	0.705144
TM4SF19-TCTEX1D2	-2.155	-1.472	0.683	0.0291498	0.705144
BLACAT1	-0.706	-0.025	0.681	0.0375361	0.705144
TFAP2A-AS1	-0.247	0.432	0.679	0.025831	0.705144
DSC3	1.259	1.937	0.678	0.0396769	0.705144
TNFRSF13B	-2.198	-1.521	0.677	0.0461132	0.705144
ENTPD3-AS1	-1.696	-1.021	0.675	0.0381314	0.705144
RDH13	2.977	3.652	0.675	0.00241203	0.705144
LOC101927023	-1.808	-1.136	0.672	0.0301159	0.705144
GOLGA6A	-2.249	-1.579	0.67	0.0226071	0.705144
TRAF1	2.958	3.627	0.669	0.00350214	0.705144
TMEM8C	-1.665	-0.997	0.668	0.0386568	0.705144
TTC12	2.147	2.815	0.668	0.00861533	0.705144
C10orf91	-0.965	-0.301	0.664	0.0310504	0.705144
GP6	-1.348	-0.689	0.659	0.00619483	0.705144
RNASEK-C17orf49	0.402	1.06	0.658	0.0166422	0.705144
STAP2	4.224	4.882	0.658	0.0104925	0.705144
LOC101928381	-1.919	-1.264	0.655	0.0467815	0.705144
LOC101926889	-2.149	-1.496	0.653	0.0252707	0.705144
ADAMTS13	1.244	1.896	0.652	0.0370159	0.705144
TTYH2	2.133	2.783	0.65	0.0118002	0.705144
C15orf27	-1.455	-0.808	0.647	0.0344919	0.705144
CXCR1	-2.109	-1.462	0.647	0.0127639	0.705144
ALMS1P	-1.72	-1.08	0.64	0.0405886	0.705144
NOS2	-1.314	-0.674	0.64	0.0279653	0.705144
LTB4R	3.399	4.028	0.629	0.039519	0.705144
LTBP2	3.778	4.406	0.628	0.0455394	0.705144
PMFBP1	-0.671	-0.047	0.624	0.0485752	0.705144
CXCR2	-1.666	-1.046	0.62	0.0345694	0.705144
RAB11B-AS1	1.908	2.527	0.619	0.000329692	0.705144
PTK2B	3.151	3.769	0.618	0.03709	0.705144
LINC00638	-0.656	-0.039	0.617	0.0178685	0.705144
SEC14L2	2.826	3.443	0.617	0.049748	0.705144
TERT	-1.204	-0.587	0.617	0.0413716	0.705144
LOC100133286	-2.091	-1.475	0.616	0.0131236	0.705144
PROSER2	1.763	2.375	0.612	0.03759	0.705144
LMNTD2	1.727	2.336	0.609	0.0367017	0.705144
MROH8	-0.694	-0.088	0.606	0.00563062	0.705144
NUTM2B	0.17	0.774	0.604	0.0179753	0.705144
KCNJ10	-1.503	-0.901	0.602	0.0208163	0.705144
LINC01138	2.696	3.295	0.599	0.0414564	0.705144
PROSER2-AS1	-1.465	-0.867	0.598	0.0246844	0.705144
BAIAP2L2	0.723	1.319	0.596	0.0443604	0.705144
IDUA	3.447	4.043	0.596	0.0153808	0.705144
KLHL29	1.728	2.32	0.592	0.0040504	0.705144
MKRN7P	-1.995	-1.403	0.592	0.041596	0.705144
PML	4.995	5.585	0.59	0.0398975	0.705144
CHURC1-FNTB	2.784	3.373	0.589	0.00433211	0.705144
VIPR1	1.399	1.987	0.588	0.047061	0.705144
RAB6B	1.547	0.961	-0.586	0.0268998	0.705144
LINC00648	-0.812	-1.4	-0.588	0.0176709	0.705144
ROS1	-1.455	-2.048	-0.593	0.0282228	0.705144
PLA2G10	-0.671	-1.274	-0.603	0.0147478	0.705144
TBL1X	3.148	2.537	-0.611	0.0377576	0.705144
FAM45B	3.87	3.258	-0.612	0.0380575	0.705144
H2AFZ	8.571	7.957	-0.614	0.0270798	0.705144
ZNF221	0.056	-0.559	-0.615	0.0427913	0.705144
SVIP	3.636	3.013	-0.623	0.0197889	0.705144
HBE1	-1.358	-1.986	-0.628	0.0119782	0.705144
MB21D2	2.427	1.798	-0.629	0.0485249	0.705144
TMEM14A	5.3	4.662	-0.638	0.022437	0.705144
ETV2	0.054	-0.587	-0.641	0.0472711	0.705144
FAM63B	2.265	1.619	-0.646	0.0346244	0.705144
C16orf87	3.222	2.574	-0.648	0.0187616	0.705144
FAM102B	2.94	2.286	-0.654	0.010003	0.705144
DYNLT3	4.76	4.105	-0.655	0.00332617	0.705144
PRKACB	3.726	3.066	-0.66	0.0105063	0.705144
TBC1D9	3.167	2.504	-0.663	0.0329119	0.705144
SPECC1	3.604	2.929	-0.675	0.00926534	0.705144
SESTD1	2.514	1.829	-0.685	0.0210359	0.705144
CDH3	4.074	3.376	-0.698	0.0329217	0.705144
NRIP3	0.681	-0.017	-0.698	0.036174	0.705144
DSTN	8.182	7.476	-0.706	0.0199312	0.705144
ZNF669	2.318	1.612	-0.706	0.00608993	0.705144
GUSBP5	-0.165	-0.873	-0.708	0.0210528	0.705144
TYRO3	2.543	1.828	-0.715	0.0491933	0.705144
SLC40A1	5.325	4.608	-0.717	0.038166	0.705144
DCK	4.022	3.283	-0.739	0.0401265	0.705144
AMIGO2	3.265	2.514	-0.751	0.0289056	0.705144
BMP8B	1.403	0.647	-0.756	0.0387772	0.705144
ZNF354C	1.262	0.499	-0.763	0.0239769	0.705144
TGFB2	1.444	0.68	-0.764	0.0202537	0.705144
ANGPT1	0.562	-0.204	-0.766	0.0374652	0.705144
PDE10A	0.579	-0.187	-0.766	0.0477565	0.705144
TXNRD1	5.457	4.687	-0.77	0.0417616	0.705144
SNX7	4.358	3.585	-0.773	0.0480566	0.705144
ZNF883	1.254	0.481	-0.773	0.0123743	0.705144
CAPSL	-1.401	-2.178	-0.777	0.0338618	0.705144
IGFBPL1	0.91	0.131	-0.779	0.0456697	0.705144
ECT2	4.688	3.891	-0.797	0.0308931	0.705144
CDKN2A	4.34	3.54	-0.8	0.0378658	0.705144
SHISA4	3.177	2.374	-0.803	0.0450942	0.705144
KCNK3	-0.503	-1.311	-0.808	0.0314639	0.705144
SLC25A24	4.572	3.747	-0.825	0.00536822	0.705144
BRSK1	1.643	0.812	-0.831	0.0440506	0.705144
MRGPRF-AS1	-1.29	-2.121	-0.831	0.0269512	0.705144
PCDHGB4	-0.077	-0.925	-0.848	0.0477028	0.705144
TAF13	4.594	3.734	-0.86	0.0266843	0.705144
ADAM9	5.595	4.733	-0.862	0.00997007	0.705144
KLHL4	-0.947	-1.811	-0.864	0.0489023	0.705144
LINC00857	0.646	-0.219	-0.865	0.039492	0.705144
LAMA3	3.916	3.045	-0.871	0.044585	0.705144
RYR2	-0.108	-0.982	-0.874	0.0124468	0.705144
IQCD	0.772	-0.107	-0.879	0.00594056	0.705144
BEND6	0.441	-0.468	-0.909	0.0122288	0.705144
FAIM2	-0.136	-1.045	-0.909	0.0219489	0.705144
LINC01116	2.674	1.743	-0.931	0.0380839	0.705144
SYT11	2.491	1.505	-0.986	0.0389845	0.705144
SAMD13	0.702	-0.305	-1.007	0.00492071	0.705144
LGI2	0.489	-0.535	-1.024	0.036158	0.705144
FHL2	5.871	4.845	-1.026	0.0187778	0.705144
GLRB	1.084	0.047	-1.037	0.0429173	0.705144
C14orf132	1.546	0.499	-1.047	0.0487524	0.705144
SYT1	0.44	-0.621	-1.061	0.0112197	0.705144
PDGFC	4.295	3.224	-1.071	0.0333963	0.705144
HOXA11	0.338	-0.745	-1.083	0.00924298	0.705144
WNT9A	0.902	-0.189	-1.091	0.0167662	0.705144
SERTAD4	1.369	0.242	-1.127	0.00250548	0.705144
ROR1	0.279	-0.85	-1.129	0.0338962	0.705144
GALNT4	2.097	0.956	-1.141	0.0148776	0.705144
AKAP12	2.556	1.326	-1.23	0.0312002	0.705144
GABRA3	-0.127	-1.399	-1.272	0.014022	0.705144
MMP12	3.662	2.313	-1.349	0.0253832	0.705144
